# Supplementary material
Source: publisher site journal article supplement (https://www.spandidos-publications.com/828/downloadSupplementary)
Supplement: Supplementary file 1 [file downloadSupplementary]

## Sheet: Sheet1
Table SI.Upregulated and downregulated circRNAs identified in adipocytes compared with HPA-v. HPA-v, human preadipocytes from visceral fat tissue; AD, adipocytes; FC, fold change.
circRNAID	HPA-v1	HPA-v2	HPA-v3	AD1	AD2	AD3	FC (abs)	P-value	Regulation
hsa_circ_0136134	2.78884	3.49395	4.82531	5145.51	5838.22	5894.73	1925.32	0.000755417	up
hsa_circ_0136132	4.62805	12.8981	7.96409	6146.37	7394.46	8201.46	1141.09	0.00132595	up
hsa_circ_0136131	8.63744	14.5237	9.59074	5352.58	6393.48	5841.52	680.307	0.000681589	up
hsa_circ_0067409	9.11701	5.98414	3.79535	3077.73	2260.5	3083.39	581.193	0.0011023	up
hsa_circ_0094183	21.3889	14.36	11.3635	5617.44	7336.44	7301.06	546.663	0.000667534	up
hsa_circ_0060972	15.1869	11.0952	6.38077	4011.46	4968.71	4157.91	526.642	0.000966689	up
hsa_circ_0017650	23.1257	24.4125	11.4991	5969.7	7407.75	6923.52	447.094	0.00091727	up
hsa_circ_0128428	2.454	2.28182	3.71272	756.351	737.174	883.614	355.443	0.000967761	up
hsa-circRNA9227-1	8.38521	8.00648	3.81441	1774.26	1929.86	1602.47	343.704	0.00109353	up
hsa_circ_0060971	24.1105	12.5132	8.25468	3931.73	3445.93	3706.44	336.815	0.00150626	up
hsa_circ_0012949	2.54133	2.50901	3.83785	699.351	740.938	801.574	318.022	0.000907497	up
hsa_circ_0105888	9.36877	2.92273	9.58767	1617.59	1771.68	1516.7	315.397	0.00298906	up
hsa_circ_0127418	6.47339	2.52521	4.09912	891.586	1088.97	961.654	297.779	0.00147155	up
hsa-circRNA9227-11	2.59329	2.29925	3.75988	610.039	677.831	702.173	290.606	0.000939705	up
hsa_circ_0121911	2.49021	2.20428	4.14934	789.073	477.004	637.389	271.262	0.00171779	up
hsa_circ_0094611	13.1438	8.57492	3.87294	1678.07	1753.01	1439.37	263.913	0.00200829	up
hsa_circ_0140425	2.43124	2.17153	7.8886	618.561	584.931	602.807	214.894	0.00422562	up
hsa_circ_0067412	2.41484	2.33429	3.53314	484.035	350.715	492.974	199.688	0.00122842	up
hsa_circ_0110111	3.013	2.8073	3.88053	442.462	494.748	502.955	185.241	0.000767722	up
hsa_circ_0001883	15.7949	16.5701	8.08184	1870.67	1525.57	2000.86	172.305	0.00119578	up
hsa_circ_0094615	2.87528	2.53309	3.7833	312.029	481.68	392.585	159.501	0.00105633	up
hsa_circ_0094617	5.09961	31.5326	3.98685	997.864	1025.29	1178.14	152.733	0.00965519	up
hsa-circRNA9227-8	5.53997	10.0489	10.6474	938.581	1097.34	1046.79	151.055	0.00152686	up
hsa-circRNA9290-7	36.0715	59.0722	33.2828	5255.78	4587.52	5294.27	150.529	0.00100931	up
hsa-circRNA9834-7	8.87377	4.1627	5.64266	643.294	779.897	714.562	148.266	0.00127381	up
hsa_circ_0099477	17.599	19.538	18.6225	2064.87	2375.25	2179.35	146.794	0.000537474	up
hsa_circ_0020104	2.69947	2.27319	4.33082	387.762	258.325	418.646	144.067	0.00198716	up
hsa_circ_0134844	7.37906	5.19316	3.99247	486.382	685.175	653.303	139.19	0.00087681	up
hsa_circ_0094612	18.4035	17.5933	13.4721	1872.13	1805.77	1675.88	135.016	0.000583118	up
hsa_circ_0067413	2.46074	3.49535	3.67593	343.033	268.937	396.87	129.948	0.00122861	up
hsa-circRNA8558-1	2.72888	2.42318	4.46248	226.63	414.403	355.521	128.95	0.00188526	up
hsa-circRNA9834-12	8.75067	13.3807	5.11789	827.482	906.928	884.66	128.046	0.00157916	up
hsa_circ_0136133	63.3944	59.8325	43.111	4965.76	5867.55	6188.12	127.843	0.000568764	up
hsa_circ_0036061	15.342	12.2518	9.82791	1250.09	1257.64	1224.62	125.464	0.000613967	up
hsa_circ_0055265	12.5727	10.716	4.31861	634.351	1000.26	945.198	125.003	0.00231296	up
hsa_circ_0099195	10.7984	4.50747	4.54567	679.11	540.174	577.932	121.998	0.00205285	up
hsa_circ_0094618	8.21444	7.58602	4.30037	409.062	739.056	784.03	118.787	0.00148156	up
hsa_circ_0121628	21.3714	26.9674	17.4345	2030.23	1989.56	2199.54	118.773	0.000625747	up
hsa-circRNA9227-7	2.86813	2.73128	3.78162	274.839	341.439	267.83	117.149	0.000977014	up
hsa_circ_0025426	13.8328	19.4496	27.931	1759.01	1977.56	1820.38	116.883	0.00169318	up
hsa_circ_0067415	7.49577	6.60917	4.05401	539.381	431.571	687.895	114.747	0.0012009	up
hsa_circ_0119595	1000.4	965.708	480.299	51160.9	92284.5	75031.4	113.099	0.00158396	up
hsa_circ_0138683	24.3061	21.8675	27.2386	2144.88	2260.01	2270.18	112.935	0.000632396	up
hsa_circ_0023632	24.8868	21.6514	11.2977	1474.58	1703.24	1767.66	111.387	0.0012366	up
hsa_circ_0140424	7.70051	2.87197	4.25073	391.278	401.343	433.488	111.124	0.0020531	up
hsa_circ_0025437	2.63047	2.41766	3.61559	225.63	279.441	259.889	110.532	0.00102439	up
hsa_circ_0112091	30.5791	24.3355	8.28335	1373.77	1721.83	1827.52	109.943	0.00332347	up
hsa-circRNA10799	2.89711	3.98638	4.04918	321.883	322.87	301.17	108.245	0.00092109	up
hsa_circ_0024581	84.0586	70.2061	81.7507	6743.91	6443.78	6171.94	101.752	0.000632396	up
hsa_circ_0055255	11.7615	7.34643	4.56314	557.337	663.703	580.101	101.033	0.00161513	up
hsa_circ_0049487	2.39876	2.28511	3.68548	216.671	203.687	239.536	99.7201	0.001326	up
hsa_circ_0125464	9.96483	10.9814	3.64868	614.233	525.665	607.541	97.6454	0.00273862	up
hsa_circ_0013506	137.482	118.591	102.157	8641.67	10057.9	9033.41	96.3083	0.000537474	up
hsa_circ_0086757	67.3489	45.5755	34.67	3922.35	3543.05	3331.57	93.7677	0.00112466	up
hsa_circ_0095426	9.00569	9.98345	5.22464	494.411	536.532	768.723	93.6987	0.00124444	up
hsa_circ_0094613	16.6531	16.5388	15.3696	1082.37	1201.02	1407.89	93.5719	0.000537474	up
hsa_circ_0090848	5.02291	8.9294	3.55409	390.279	409.647	425.183	93.1435	0.00171977	up
hsa_circ_0024575	65.1677	51.2732	52.7706	4839.19	4219.08	3679.38	93.1147	0.000831985	up
hsa-circRNA14372-2	2.52188	2.426	3.87341	197.144	213.89	238.283	92.9652	0.00130131	up
hsa_circ_0025431	5.95165	4.48316	7.59492	366.949	487.346	473.534	92.516	0.00129276	up
hsa_circ_0128828	5.72824	5.81498	5.44803	396.763	480.285	396.945	92.4382	0.000563727	up
hsa_circ_0035431	2.45796	3.08596	3.76922	235.218	219.737	227.513	92.0285	0.00113787	up
hsa_circ_0088174	2.40225	4.84932	3.54948	293.815	220.237	255.867	91.2092	0.00183079	up
hsa_circ_0035019	6.77543	5.75966	8.12138	427.785	657.73	446.471	90.901	0.00121216	up
hsa_circ_0025424	24.8508	27.6037	17.2685	1440.79	1705.5	1864.21	90.1563	0.00066128	up
hsa_circ_0021340	18.0174	30.0064	6.45206	960.847	1089.72	1272.27	89.7803	0.00489203	up
hsa_circ_0067417	21.4121	21.8808	17.3813	1607.31	1143.6	1614.24	88.3852	0.000867526	up
hsa_circ_0091578	26.3527	26.8344	25.2794	1662.49	1819.59	2078.97	87.3574	0.000537474	up
hsa_circ_0126910	2.38132	2.2761	4.32912	225.65	164.219	213.951	86.1898	0.00232636	up
hsa_circ_0007960	12.7257	7.96152	8.41716	582.814	754.482	648.814	85.9052	0.00087833	up
hsa_circ_0013507	2.36747	2.24131	3.60654	135.577	246.032	187.557	85.247	0.00178028	up
hsa_circ_0025432	13.7081	9.10867	15.2634	837.755	898.163	827.935	85.2439	0.00127772	up
hsa-circRNA9290-8	88.2719	74.7189	57.4239	5241.12	4728.49	4828.32	84.2816	0.000667534	up
hsa_circ_0122861	2.4836	2.22677	4.7364	194.195	222.695	186.631	83.5816	0.00244961	up
hsa_circ_0067410	8.82416	7.3578	3.80293	517.495	313.51	454.043	82.6873	0.00224693	up
hsa-circRNA1389-2	30.0735	33.9025	25.9212	1895.11	2031.12	1927.11	81.022	0.000537474	up
hsa_circ_0095419	11.3449	16.2469	8.34861	820.28	601.391	846.939	80.1301	0.00142355	up
hsa_circ_0127417	2.37012	2.34072	3.61355	120.606	170.986	254.006	79.1117	0.00206811	up
hsa_circ_0024582	41.0776	23.2371	36.7901	2133.08	2151.94	1993.65	79.0419	0.00134873	up
hsa-circRNA15033	10.6405	8.26721	4.85415	474.127	502.986	458.77	78.5967	0.00131904	up
hsa-circRNA7601-18	2.36381	2.25515	3.65716	169.13	178.044	163.899	78.2827	0.00143033	up
hsa_circ_0095417	3.83491	14.1039	6.47266	443.618	388.68	513.683	78.2661	0.00468552	up
hsa_circ_0016525	132.884	133.102	113.437	7576.92	7899.9	8205.22	77.4101	0.000391592	up
hsa-circRNA10800-2	16.36	8.90441	6.93539	580.212	646.087	633.752	76.3801	0.00158906	up
hsa_circ_0125716	4.06553	8.63481	8.7194	393.141	398.64	455.716	76.1828	0.00254369	up
hsa_circ_0020108	9.31959	10.4242	3.99725	552.964	282.825	546.527	74.7152	0.00380487	up
hsa_circ_0032686	123.391	118.829	91.7285	7645.03	5070.52	7600.36	74.5968	0.00109173	up
hsa_circ_0132956	4.05344	2.65556	4.05942	184.03	265.771	195.139	74.5246	0.00132889	up
hsa_circ_0027586	8.37403	6.72528	4.1543	409.457	256.739	479.683	74.1945	0.00205693	up
hsa_circ_0049236	2.45598	2.18701	7.42865	239.992	137.086	258.631	73.9314	0.00751156	up
hsa-circRNA9834-45	17.812	16.1465	11.2425	848.913	916.032	848.696	72.8604	0.000661145	up
hsa_circ_0059353	3.71769	2.24897	3.62382	191.172	153.095	209.668	72.6716	0.00154377	up
hsa_circ_0023528	11.7304	11.7448	3.55576	339.735	681.975	428.191	72.6695	0.00491751	up
hsa-circRNA16243	45.8557	35.7433	30.4401	2035.05	2243.88	2189.04	72.4101	0.000609408	up
hsa_circ_0132959	24.9612	34.6129	14.6021	1291	1309.51	1491.35	72.349	0.00159991	up
hsa_circ_0071011	2.84948	2.37907	9.24677	238.017	242.751	214.084	72.0441	0.00728534	up
hsa_circ_0094060	9.41443	7.71535	5.44729	420.451	390.813	472.401	71.9045	0.000843065	up
hsa_circ_0130606	13.7902	7.22107	17.391	663.249	700.953	702.503	70.9642	0.00270989	up
hsa_circ_0099504	19.9601	4.06041	3.72624	421.753	358.019	374.892	70.8201	0.00909132	up
hsa_circ_0131371	22.4235	26.0266	30.2194	1616.66	1430.63	1401.82	70.363	0.00105107	up
hsa_circ_0094607	28.7273	17.4222	23.9224	1296.05	1212.52	1380.45	70.0236	0.00109353	up
hsa_circ_0025447	17.6324	23.3663	9.39566	817.311	996.438	851.511	69.7591	0.0018445	up
hsa_circ_0006124	26.8583	11.9673	3.65676	495.699	685.721	575.471	68.0676	0.00992853	up
hsa-circRNA14580-2	6.35532	2.49869	3.76368	219.386	227.855	192.145	67.2789	0.00247097	up
hsa_circ_0022772	95.1981	101.186	79.2815	5073.26	4760.73	4978.56	66.8214	0.000568764	up
hsa_circ_0095424	25.2633	28.4364	10.1526	1192.45	936.515	1026.96	66.7917	0.00293232	up
hsa_circ_0087945	3.33541	3.01688	4.21805	132.925	210.444	236.269	66.575	0.00141395	up
hsa_circ_0081880	4.86979	14.7562	4.78854	350.673	358.818	423.77	66.4672	0.00423822	up
hsa_circ_0024746	9.56593	9.4637	3.50931	355.378	382.518	348.031	65.592	0.00276037	up
hsa_circ_0095423	10.6043	11.6497	5.42645	460.226	426.2	507.877	65.5458	0.00153371	up
hsa-circRNA16245-7	37.5846	29.7621	24.5888	1663.46	1517.11	1577.19	64.9682	0.000691745	up
hsa_circ_0081881	4.28426	3.1156	3.72404	195.688	206.501	172.599	64.3031	0.000849985	up
hsa_circ_0127593	7.68973	5.03359	7.5969	342.127	352.384	340.79	64.213	0.00115304	up
hsa_circ_0095421	7.56983	4.43126	4.1868	266.771	237.215	306.191	63.9431	0.00126666	up
hsa_circ_0131374	29.93	34.1285	36.7747	1523.03	1989.79	1699.16	63.8058	0.000791726	up
hsa_circ_0081879	10.7755	10.9498	9.93292	506.989	557.455	562.476	63.5817	0.000391592	up
hsa_circ_0067408	4.57945	2.21498	3.77299	198.347	130.867	191.405	62.6586	0.00254915	up
hsa_circ_0052001	2.4759	4.04033	3.76871	164.5	171.723	172.899	62.6157	0.00132902	up
hsa_circ_0115161	134.303	105.04	137.279	6011.2	6847.41	5925.6	62.0287	0.000846941	up
hsa_circ_0112089	67.2216	48.916	34.545	2252.75	2326.17	2728.95	62.0205	0.00107106	up
hsa_circ_0022770	157.973	112.906	106.751	6313.31	6137.43	6053.17	61.5724	0.000721908	up
hsa_circ_0079445	2.59197	2.28887	4.04324	119.177	138.871	165.586	60.0459	0.00182222	up
hsa_circ_0094614	3.5916	3.43054	3.8194	153.599	189.545	176.176	59.1109	0.000613263	up
hsa-circRNA12865	2.58635	7.73812	3.76842	168.057	228.272	204.53	58.2008	0.00374548	up
hsa-circRNA9316-15	2.96899	5.91203	4.11538	206.064	169.726	211.689	57.9117	0.00190892	up
hsa-circRNA1244-12	10.6422	21.2311	11.9799	681.463	532.464	755.148	57.6727	0.0020447	up
hsa-circRNA5737-11	7.71105	13.7134	8.68102	513.261	319.829	552.181	57.1967	0.00230892	up
hsa_circ_0131368	27.903	18.4486	36.3088	1187.95	1195.36	1274.66	56.8271	0.00198506	up
hsa_circ_0021339	15.02	15.907	13.4356	707.748	633.968	691.751	56.7972	0.000568764	up
hsa_circ_0081878	25.6802	15.7621	20.0625	820.508	915.847	1017.73	56.3008	0.00100931	up
hsa_circ_0095420	17.6986	21.5864	10.1259	684.674	709.165	725.433	55.6707	0.00140775	up
hsa_circ_0095413	13.9226	9.8153	7.73308	386.654	454.311	531.787	55.1247	0.00100743	up
hsa_circ_0095416	35.3328	31.8318	10.4259	990.014	989.782	1052.74	55.0366	0.00426816	up
hsa_circ_0024576	175.439	170.534	153.578	7224.75	7520.34	7381.25	54.892	0.000516353	up
hsa_circ_0132958	35.58	34.4727	28.9803	1547.89	1358.67	1421.15	54.2131	0.000613263	up
hsa_circ_0095432	70.2066	75.4985	43.9868	2674.31	2603.19	2780.52	53.9845	0.00092085	up
hsa-circRNA5964-1	3.11515	3.79145	4.25951	150.435	166.422	164.621	53.7446	0.000939705	up
hsa_circ_0021342	53.5844	62.3013	24.9757	2105.15	1642.12	1972.99	53.7181	0.00248807	up
hsa_circ_0117735	2.76028	2.70628	3.9824	96.8975	167.082	145.125	53.0931	0.00174767	up
hsa_circ_0021343	3.6518	4.40954	4.01252	192.775	148.051	175.529	52.7674	0.000939705	up
hsa_circ_0087942	2.77179	4.00056	4.27202	169.7	144.21	148.925	52.6315	0.00153597	up
hsa_circ_0021341	16.7418	14.9957	9.74014	577.244	478.381	669.425	52.324	0.00115061	up
hsa_circ_0067418	19.9898	15.9846	13.9997	843.197	487.05	821.36	52.2802	0.00171916	up
hsa-circRNA5964-2	2.74908	2.48692	4.11566	121.03	129.436	135.394	52.2742	0.00158463	up
hsa-circRNA1244-16	29.9112	34.9173	8.62333	869.23	858.273	897.034	52.0244	0.00594636	up
hsa_circ_0095425	47.8436	26.7789	19.2625	1410.69	1035.08	1228.61	51.6453	0.0024786	up
hsa_circ_0135145	2.49309	2.43691	3.50025	95.8399	137.593	114.582	51.2541	0.00137273	up
hsa_circ_0073582	9.57589	3.46589	3.844	281.075	167.462	192.14	51.2147	0.00471454	up
hsa_circ_0027585	2.88599	2.69637	4.00941	137.7	109.63	143.826	50.8997	0.00157271	up
hsa_circ_0019283	2.36544	2.25458	3.6518	107.931	118.806	103.939	50.6167	0.00169579	up
hsa_circ_0066035	4.75088	6.24001	3.63725	205.812	200.127	176.408	50.3565	0.00109353	up
hsa_circ_0040412	39.7763	43.073	22.0942	1092.01	1949.36	1178.79	50.0822	0.00211394	up
hsa_circ_0023529	15.0263	11.789	13.5609	395.515	721.471	556.795	50.0441	0.00122941	up
hsa_circ_0055259	54.6876	54.2507	41.0812	1733.97	2025.38	2280.64	49.9371	0.000568764	up
hsa-circRNA10485-1	2.92141	2.71448	4.03615	119.008	140.761	124.424	49.786	0.00131904	up
hsa_circ_0122862	4.31861	2.26878	3.59078	128.862	139.049	122.377	49.0632	0.00173613	up
hsa_circ_0119017	2.96653	2.64877	3.71004	91.4911	139.75	139.613	48.7748	0.00133409	up
hsa_circ_0104698	7.07995	9.31395	3.55446	234.004	238.855	242.621	47.8612	0.00238095	up
hsa_circ_0095431	13.0412	14.7374	5.42531	258.522	438.911	531.394	47.8531	0.003954	up
hsa_circ_0022133	2.3617	2.25283	3.64954	173.497	74.6869	78.6347	46.3291	0.00541278	up
hsa_circ_0131931	4.09605	2.39674	4.24717	146.198	101.772	144.116	46.0186	0.00248661	up
hsa_circ_0024583	391.79	288.252	337.76	13321.9	12329.9	11887	45.9468	0.000882317	up
hsa_circ_0025421	5.22234	8.95946	7.73391	265.106	254.244	271.624	45.7683	0.00157304	up
hsa-circRNA958-2	27.7714	14.4863	8.53867	593.216	497.116	586.687	45.6995	0.00376141	up
hsa_circ_0127591	14.114	16.8914	4.93176	378.477	391.155	396.189	45.5538	0.00460497	up
hsa_circ_0003625	21.5385	24.9647	25.795	823.1	923.422	901.792	45.411	0.000700211	up
hsa_circ_0121631	32.9887	28.965	23.7834	925.51	1058.26	1137.09	45.2848	0.000537474	up
hsa_circ_0024677	2.46046	2.2866	3.93238	51.0993	203.531	101.454	44.8764	0.00739359	up
hsa-circRNA14247	6.26137	17.486	12.2952	425.075	398.492	367.291	44.4086	0.00435921	up
hsa-circRNA9090-2	5.42816	2.22795	4.19193	126.183	133.192	138.164	44.2759	0.00294393	up
hsa_circ_0131933	3.30934	2.62586	3.89404	131.921	80.7027	143.541	44.068	0.00244334	up
hsa_circ_0035127	2.72051	2.53989	3.55653	85.5605	105.593	118.178	43.5029	0.00122591	up
hsa_circ_0081945	4.83253	12.6633	8.05085	203.156	332.059	313.086	43.3096	0.003954	up
hsa_circ_0138040	17.6424	19.1416	16.9724	656.088	640.333	568.623	42.9048	0.000647116	up
hsa_circ_0095721	2.40676	2.37048	3.65446	56.9419	191.622	77.1735	42.4572	0.00633666	up
hsa_circ_0099507	2.69167	2.684	4.52431	106.569	128.067	95.6644	42.3013	0.00237219	up
hsa_circ_0052004	5.65776	2.66528	3.8903	134.423	130.5	129.936	41.913	0.00205447	up
hsa_circ_0073388	2.63306	2.56596	4.02406	79.7139	93.154	140.701	41.7594	0.00233443	up
hsa-circRNA1389-4	155.451	126.905	112.648	4169.69	4907.82	4130.11	41.6153	0.000631797	up
hsa_circ_0129419	2.58102	2.55161	3.76463	89.2835	115.958	90.9062	41.5891	0.00161937	up
hsa-circRNA3622-1	2.51434	2.44984	3.76168	39.8344	114.605	185.05	41.0333	0.00893175	up
hsa_circ_0135143	2.61235	2.45313	4.40532	67.4407	131.403	113.605	40.7317	0.00332724	up
hsa_circ_0132634	2.84353	5.31304	4.50552	120.701	135.166	147.809	40.6423	0.00195463	up
hsa_circ_0020105	12.1511	7.36156	13.0265	369.197	260.116	428.882	40.6117	0.00278282	up
hsa_circ_0122858	8.81267	4.66268	4.43232	178.633	208.963	167.886	40.2493	0.00186511	up
hsa_circ_0095418	23.3314	32.6105	14.8103	789.06	710.53	689.235	40.2037	0.00191833	up
hsa-circRNA447-1	80.352	110.847	99.8748	2739.88	3918.04	2835.71	40.1756	0.00127175	up
hsa-circRNA9834-19	8.9417	9.90943	19.0736	377.939	389.797	391.901	40.1525	0.00340876	up
hsa_circ_0132205	2.7037	2.3973	3.86649	158.198	53.42	101.295	40.1513	0.00663493	up
hsa-circRNA14431-41	2305.87	2791.44	1351.88	61821.7	76151	62402.2	39.995	0.00160744	up
hsa-circRNA6231	2.71079	5.23537	3.91165	132.485	106.186	133.06	39.9786	0.00222302	up
hsa-circRNA7949-8	3762.47	4949.13	1852.68	112371	106069	97207.8	39.9253	0.00293341	up
hsa-circRNA6358-48	2.5564	3.7456	3.49513	61.2263	75.1677	243.035	39.8605	0.00796299	up
hsa_circ_0075698	65.3253	53.7297	42.1255	1461.16	1960.8	1700.3	39.6709	0.000774626	up
hsa-circRNA7601-19	6.35532	2.38235	3.97799	118.332	111.857	147.854	39.488	0.0035598	up
hsa_circ_0115398	2.56934	4.33628	4.1174	98.9238	127.782	115.465	39.2121	0.00182938	up
hsa_circ_0049239	6.97254	5.19484	8.90189	259.317	158.851	247.511	39.1313	0.00293107	up
hsa-circRNA9316-11	3.8432	11.3296	3.88771	175.831	186.67	162.09	39.0519	0.00532014	up
hsa_circ_0072340	40.5568	35.9542	27.1365	992.985	1086.15	1148.72	39.0027	0.000613263	up
hsa_circ_0133100	2.92034	2.71574	4.03268	76.3355	109.885	118.202	38.874	0.00168426	up
hsa_circ_0035024	4.34471	3.83979	3.86095	90.1384	163.589	133.54	38.6936	0.00115071	up
hsa-circRNA7158-1	2.47396	2.33438	5.06995	85.6594	124.402	81.3841	38.2877	0.00449563	up
hsa-circRNA10578-2	3.32084	2.35988	3.56982	85.7061	105.216	91.7975	38.275	0.0013334	up
hsa-circRNA14363-30	14.8861	11.1584	4.55912	286.931	237.9	327.109	38.2297	0.00460503	up
hsa_circ_0127596	3.74552	4.83753	3.7903	124.31	125.121	128.864	38.0995	0.000670239	up
hsa_circ_0099197	25.3053	30.2904	18.4077	906.022	658.465	684.563	37.9948	0.00153082	up
hsa-circRNA1893-15	25.3099	29.5996	17.6243	913.163	543.228	726.475	37.2582	0.00208292	up
hsa_circ_0094622	38.71	38.7691	28.0673	999.256	1256.11	893.969	36.9578	0.000960235	up
hsa_circ_0055267	13.4483	13.8533	9.70246	364.325	370.43	352.736	36.817	0.000651177	up
hsa_circ_0099515	2.50461	2.41369	3.64688	93.2718	96.4351	64.0226	36.7163	0.00252055	up
hsa_circ_0128505	17.3075	12.9739	8.46025	285.783	368.857	461.513	36.4752	0.00172657	up
hsa-circRNA7601-23	3.09322	2.8693	4.46123	64.1696	141.704	111.367	36.4593	0.00319479	up
hsa_circ_0020111	3.12547	2.81859	4.47513	122.135	70.8939	116.039	36.4168	0.00319836	up
hsa_circ_0098499	2.6009	4.86428	4.17515	93.1927	111.461	128.362	36.3003	0.00218314	up
hsa-circRNA7158-2	5.93302	2.64642	4.48512	117.42	105.272	140.092	35.9849	0.0028958	up
hsa_circ_0037515	4.69649	7.21866	4.84657	141.291	191.949	148.918	35.9801	0.00130302	up
hsa_circ_0002758	45.0073	35.8644	28.6522	1014.48	1037.93	1054.51	35.6988	0.000721908	up
hsa_circ_0115160	4.63841	8.08243	4.27141	167.891	142.892	156.485	35.4168	0.00191055	up
hsa_circ_0057223	26.0272	14.369	20.4903	564.705	482.368	653.563	35.3098	0.00187043	up
hsa_circ_0099194	6.69432	5.82238	4.14354	181.142	111.766	185.103	35.2957	0.00199562	up
hsa_circ_0020112	2.63964	2.6434	4.48602	103.342	55.4114	126.347	35.25	0.00526852	up
hsa_circ_0132960	23.4319	21.0285	12.5142	387.443	649.728	556.188	35.0414	0.0017093	up
hsa_circ_0068483	2.92208	3.2426	4.98242	109.823	98.9252	95.8403	34.7037	0.00235044	up
hsa_circ_0081950	10.2517	9.33561	7.40326	218.607	279.216	253.212	34.5762	0.000609408	up
hsa-circRNA9089-3	10.0777	9.99425	7.28095	292.582	227.097	236.109	34.3525	0.00109351	up
hsa_circ_0133007	46.5928	31.3826	24.8334	959.731	1023.72	782.814	34.2386	0.00160628	up
hsa_circ_0068482	17.6822	20.2567	23.873	472.222	657.895	582.335	34.2259	0.00122414	up
hsa_circ_0069619	2.48879	2.42492	3.49321	69.3826	81.7314	78.6449	34.2243	0.00140775	up
hsa_circ_0132957	29.7387	33.8669	22.3632	730.283	681.032	940.933	34.0196	0.000967177	up
hsa_circ_0126996	10.7079	2.49237	4.11114	147.068	130.042	118.908	33.9921	0.00879205	up
hsa_circ_0103006	66.3295	57.2614	61.1884	1591.74	1620.57	1855.86	33.9221	0.000609408	up
hsa_circ_0066197	2.89899	3.00109	3.91648	105.735	77.3258	85.5151	33.8784	0.00181145	up
hsa_circ_0110394	45.5201	53.7908	54.223	1166.2	1433.72	1624.81	33.8467	0.000882317	up
hsa_circ_0133330	3.31187	2.4085	3.87718	80.0311	110.465	70.5139	33.6776	0.00228096	up
hsa-circRNA15276-6	4.47535	2.37868	5.21947	68.9128	135.063	116.979	33.3621	0.0046551	up
hsa_circ_0084803	14.9518	10.7503	4.3611	223.03	233.22	258.671	33.1328	0.00490389	up
hsa_circ_0084807	37.7638	21.1433	18.3519	510.493	740.076	739.096	33.0532	0.00202566	up
hsa-circRNA8643-31	31.7291	27.5362	24.9965	559.223	738.441	1003.53	33.0064	0.00112908	up
hsa-circRNA9323-2	6126.73	3934.8	2264.78	114260	100577	89703.8	32.9516	0.00332836	up
hsa_circ_0008417	3.9622	8.09551	4.34908	130.756	114.525	173.389	32.7947	0.00285963	up
hsa_circ_0077306	2.45992	3.98633	3.97542	94.8354	82.0124	92.722	32.728	0.00207625	up
hsa_circ_0127604	2.53514	2.46964	3.77268	122.195	50.0695	70.6047	32.6031	0.00578328	up
hsa_circ_0095415	51.0783	59.5855	30.5059	1067.64	1228.47	1290.6	32.5693	0.00139757	up
hsa_circ_0094610	71.5593	59.1779	70.4308	1704.69	1860.18	1707.53	32.5232	0.000769947	up
hsa_circ_0128827	9.55388	4.415	4.1224	123.557	171.427	148.521	32.4857	0.0029064	up
hsa_circ_0073380	7.71176	7.6654	3.84332	136.478	161.915	185.813	32.4746	0.00184296	up
hsa_circ_0059354	2.98996	2.83698	3.64973	81.8969	69.5621	97.2434	32.3673	0.00134873	up
hsa_circ_0055956	5.19963	8.47428	3.63493	114.398	162.264	152.863	32.2596	0.00245991	up
hsa-circRNA7158-3	2.37955	2.57291	3.90059	65.2116	85.9746	74.8204	32.1679	0.00208818	up
hsa_circ_0027724	12.6925	7.6468	3.59553	162.346	209.957	177.132	32.0057	0.00512412	up
hsa_circ_0073395	10.5172	10.8827	4.48564	250.825	160.351	215.926	31.7659	0.00410357	up
hsa_circ_0025411	3.40267	2.31796	3.69368	71.0734	91.6059	75.2725	31.7074	0.00171295	up
hsa_circ_0094603	76.9676	62.0342	59.179	1683.59	1613.18	1720.33	31.5265	0.000614336	up
hsa_circ_0022771	87.1494	63.4875	48.4865	1706.94	1682.06	1533.01	31.4445	0.00125077	up
hsa_circ_0138663	2.63554	2.29424	4.34977	82.7527	41.8727	123.329	31.3426	0.00790157	up
hsa-circRNA8172	3.00476	3.6304	4.2265	57.7259	90.7338	142.227	31.2843	0.00334602	up
hsa_circ_0133005	16.3476	7.2865	4.27041	142.852	248.119	229.038	31.1557	0.00693787	up
hsa_circ_0116316	20.4111	17.0609	8.17178	248.031	385.743	471.655	31.0896	0.00370099	up
hsa_circ_0099200	12.5036	10.1712	7.12182	259.565	221.091	247.268	30.9644	0.00123593	up
hsa-circRNA9834-16	3.11934	2.88017	4.76273	86.9032	106.637	71.3647	30.8246	0.00277145	up
hsa-circRNA15276-5	2.72373	2.49529	4.31933	58.2313	86.0088	90.5759	30.8227	0.00272072	up
hsa_circ_0025633	2.58963	2.37289	3.90241	62.7086	75.2597	78.389	30.8059	0.00201554	up
hsa_circ_0099505	15.0846	12.9192	6.84215	255.444	309.158	259.994	30.7865	0.00206846	up
hsa_circ_0129077	65.7781	54.2753	38.2669	1188.73	1181.92	1495.36	30.7731	0.00108441	up
hsa_circ_0074565	2.52047	2.21539	4.21096	70.7392	70.7022	72.0539	30.7383	0.00288693	up
hsa_circ_0131365	114.586	98.0335	77.2431	2425.73	2353.74	2320.49	30.7	0.000717353	up
hsa-circRNA10485-2	6.90566	4.02421	3.76471	115.112	137.82	98.1848	30.443	0.00196879	up
hsa_circ_0035048	8.83055	8.25606	7.84142	123.381	340.488	197.774	30.1987	0.00342834	up
hsa-circRNA15037-25	3.08518	2.69011	4.48962	80.6769	58.4985	113.967	30.1304	0.00366919	up
hsa_circ_0025418	12.9535	11.6792	9.55545	220.986	283.077	332.209	30.0892	0.000739839	up
hsa_circ_0020107	2.49894	2.45989	3.72203	83.3568	43.3977	89.6313	29.946	0.00465442	up
hsa_circ_0117977	4.17318	2.25166	3.61668	81.9126	73.0054	80.0888	29.8905	0.00220147	up
hsa_circ_0133102	2.42383	2.36312	3.54833	53.0315	74.8371	71.9742	29.8634	0.00188659	up
hsa_circ_0081175	3.84123	6.81945	3.60644	103.18	135.417	94.9983	29.8604	0.00237151	up
hsa_circ_0025876	16.5206	13.8086	14.2667	313.992	362.947	398.447	29.7906	0.000568764	up
hsa_circ_0115904	2.7578	2.52553	4.2151	39.3232	68.9379	149.676	29.697	0.00855375	up
hsa_circ_0023525	132.826	87.6621	87.605	2575.22	2511.01	2167.59	29.6396	0.00127175	up
hsa_circ_0095429	14.1278	9.91868	3.96697	195.435	174.728	220.214	29.4855	0.00585932	up
hsa_circ_0139020	8.24121	3.65686	4.45841	101.369	97.1011	181.509	29.3168	0.00425877	up
hsa_circ_0119105	14.3339	4.37112	7.2185	125.421	231.232	203.342	29.126	0.0069391	up
hsa-circRNA10371-1	82.8567	72.2107	71.1619	1718.23	1667.56	1919.49	29.0352	0.000568764	up
hsa_circ_0094623	85.4096	75.7465	56.1711	1460.91	2006.13	1597.55	29.0103	0.000915875	up
hsa-circRNA10371-2	23.4791	19.399	10.5029	387.484	374.832	414.608	28.7863	0.00209155	up
hsa_circ_0025086	8.26348	8.38618	4.03577	84.482	232.642	178.02	28.727	0.00560185	up
hsa_circ_0110380	104.822	83.7716	57.4465	1692.6	1985.24	1869.56	28.6835	0.00114498	up
hsa_circ_0125410	6.87452	5.13599	5.44799	158.346	114.367	128.133	28.3807	0.00138862	up
hsa_circ_0007114	4.31125	4.80794	3.6756	48.3437	191.888	98.3585	28.312	0.0071795	up
hsa_circ_0013438	64.3165	69.9765	58.8148	1333.47	1499.83	1575.73	28.2563	0.000537474	up
hsa_circ_0131373	48.1859	43.7244	42.6728	797.974	1084.57	1228.91	28.1962	0.000774626	up
hsa_circ_0079248	17.7487	15.4832	8.09917	334.24	249.823	313.298	28.1359	0.00266885	up
hsa_circ_0021519	2.46543	2.90045	3.54254	59.8306	77.9417	63.626	28.103	0.00154207	up
hsa-circRNA1967-50	82.3663	81.2149	60.4563	1439.22	1913.4	1717.94	28.0914	0.000632396	up
hsa_circ_0023524	236.499	204.144	177.327	4282.31	4459.02	5234.37	28.0725	0.000568764	up
hsa_circ_0100084	2.79355	2.55778	3.78223	33.4741	77.9501	120.265	28.0221	0.00736366	up
hsa_circ_0035432	24.8358	24.7893	10.0946	494.16	329.003	441.827	27.9788	0.0045177	up
hsa-circRNA14363-8	37.8717	24.649	19.815	684.536	464.055	671.997	27.9646	0.00236747	up
hsa_circ_0023527	17.8556	11.5251	3.88991	201.638	230.785	195.772	27.8349	0.00921979	up
hsa_circ_0083932	2635.14	2601.61	1970.64	58908.9	65836.9	39488.5	27.7986	0.00184989	up
hsa_circ_0133001	37.653	28.8262	22.7525	597.612	786.083	590.447	27.7131	0.00120826	up
hsa_circ_0094975	18.705	14.1287	10.5256	303.801	232.576	440.394	27.6756	0.00249125	up
hsa_circ_0098497	86.2014	98.3946	77.3709	1928.54	2072.46	1826.57	27.6246	0.000632396	up
hsa_circ_0028125	277.288	235.536	224.643	5223.89	5719.19	5406.03	27.5281	0.000544702	up
hsa_circ_0013689	5017.07	6527.02	3561.2	105298	133786	89740.5	27.3876	0.00191833	up
hsa_circ_0025416	26.0252	21.435	7.7826	318.303	368.438	401.271	27.3864	0.00573691	up
hsa_circ_0133003	5.33677	2.44137	3.97756	50.9166	105.621	103.734	27.3234	0.00491786	up
hsa_circ_0136130	12.6107	15.6605	7.60133	202.725	264.766	300.131	27.295	0.00195435	up
hsa_circ_0066781	4.28315	4.76071	4.00026	48.9058	111.24	158.419	27.1541	0.00507773	up
hsa_circ_0013432	128.389	141.576	104.891	2585.79	2835.66	2736.16	27.1172	0.000568764	up
hsa_circ_0116314	2.55971	2.38403	3.96894	49.7862	50.8314	99.9319	27.0473	0.00442187	up
hsa_circ_0130049	29.2723	22.9833	24.4733	703.162	422.116	578.047	27.029	0.00201157	up
hsa-circRNA3854-4	17.6109	23.7245	22.8449	533.163	415.196	445.018	26.9427	0.00164177	up
hsa_circ_0013447	180.501	160.172	136.272	3182.62	3537.12	3600.4	26.9136	0.000537474	up
hsa-circRNA9622-8	643.758	586.275	612.984	13469.1	11944.6	14670.4	26.8387	0.000721908	up
hsa_circ_0118997	135.92	100.142	83.9484	1949.74	2011.97	2969.59	26.8325	0.00138694	up
hsa_circ_0024577	692.759	706.608	637.397	14537.1	13735.7	15916.4	26.8247	0.000568764	up
hsa_circ_0099187	42.4188	31.867	37.1289	799.464	811.364	778.739	26.7177	0.000864335	up
hsa_circ_0116312	75.5174	59.0546	66.8786	1379.48	1504.98	1412.59	26.511	0.000717353	up
hsa_circ_0129079	27.8086	32.422	12.3346	418.746	514.254	499.898	26.3728	0.00352635	up
hsa_circ_0095643	6.86181	3.18988	3.51479	79.6421	105.874	88.178	26.3589	0.00278093	up
hsa_circ_0127599	7.81984	9.26918	3.85013	144.165	129.571	144.119	26.3426	0.00294079	up
hsa_circ_0109680	281.431	297.397	287.12	5313.74	6953.01	6228.17	26.2777	0.000621149	up
hsa_circ_0013433	181.518	170.825	117.27	3117.07	3360.49	3317.76	26.2611	0.000791726	up
hsa-circRNA10948-2	2.58687	3.05757	3.92548	63.231	76.3627	61.3282	26.2428	0.00185212	up
hsa_circ_0051710	4.57576	2.38592	3.56054	66.9199	67.1262	82.1159	26.1987	0.00219116	up
hsa-circRNA7601-22	2.36052	2.22532	3.78415	58.3848	56.6342	56.8781	26.1729	0.00260598	up
hsa_circ_0075504	10.49	3.55405	10.422	159.434	153.636	149.105	26.116	0.00822057	up
hsa_circ_0086193	6.08795	3.41936	3.94821	82.3297	119.253	78.3673	26.0805	0.00227124	up
hsa_circ_0078565	5013.22	5893.42	4939.19	105487	105019	122704	26.0372	0.000625747	up
hsa_circ_0075846	3.91583	5.50435	4.03561	101.915	89.1709	87.6143	25.8861	0.00127012	up
hsa_circ_0016871	13.682	11.0025	10.1705	242.669	253.198	227.652	25.8695	0.000687826	up
hsa_circ_0101445	22.6536	20.8566	12.7882	404.543	345.849	394.476	25.8679	0.00143594	up
hsa_circ_0025441	2.67822	2.51776	4.46829	45.9531	87.7127	68.1759	25.8545	0.00407278	up
hsa_circ_0025417	25.5959	31.7075	23.5475	467.462	590.183	630.978	25.8439	0.000749543	up
hsa_circ_0098496	107.54	121.796	103.72	2327.06	2274.78	2334.34	25.8315	0.000613263	up
hsa_circ_0094061	49.3642	41.9329	36.0635	913.56	961.594	761.97	25.7086	0.00093322	up
hsa_circ_0122471	2.34938	2.23831	3.70258	76.6818	39.8382	57.0205	25.6891	0.00500842	up
hsa_circ_0045780	107.841	56.6518	83.7121	1629.84	1679.42	1670.74	25.6849	0.00208336	up
hsa_circ_0116322	17.8947	29.0736	15.8876	329.535	369.157	602.413	25.612	0.00282793	up
hsa_circ_0045776	56.6835	45.1368	43.422	884.757	1171.58	948.409	25.5956	0.00078557	up
hsa_circ_0013442	203.302	138.792	173.654	3807.86	3594.85	3109.33	25.4378	0.00142954	up
hsa_circ_0113728	10.4462	3.38151	4.97736	72.9361	124.915	167.546	25.4337	0.00810617	up
hsa_circ_0127578	14.8374	8.19897	6.27561	137.081	228.065	209.488	25.3324	0.00332111	up
hsa_circ_0135401	5.8487	11.8851	4.3197	111.23	123.716	184.454	25.2081	0.00502547	up
hsa_circ_0108243	61.1843	69.6486	53.6193	1518.2	1049.7	1208.07	25.1809	0.00145472	up
hsa_circ_0131366	21.6569	25.1361	19.3743	320.657	517.312	535.494	25.1773	0.00123982	up
hsa-circRNA11231-1	53.8068	42.2582	27.8745	830.682	852.036	745.974	25.0854	0.00160097	up
hsa-circRNA1893-17	5.49473	6.62819	3.92583	103.111	93.8423	122.3	25.0315	0.00127516	up
hsa_circ_0013449	30.13	30.5541	23.3488	550.576	536.439	600.44	25.0049	0.00060495	up
hsa_circ_0087941	5.59997	2.33211	3.95836	59.5527	59.6519	119.253	24.9488	0.0061342	up
hsa_circ_0127015	9.24239	6.11846	3.76793	118.906	110.835	131.842	24.9078	0.00274541	up
hsa_circ_0096533	11.6153	15.2267	6.99427	218.434	217.129	211.226	24.8506	0.0021613	up
hsa-circRNA4696-8	2.72539	2.48791	3.63002	48.8074	51.8607	78.6179	24.8366	0.00226476	up
hsa_circ_0099509	21.3156	7.89612	5.85162	201.709	239.311	164.041	24.7905	0.00818129	up
hsa_circ_0025420	6.44758	5.91557	3.67872	79.0038	111.236	127.854	24.7575	0.00162553	up
hsa_circ_0116855	12.4987	16.3209	5.79004	170.166	250.018	222.279	24.7562	0.00437846	up
hsa_circ_0027726	3.25596	3.38699	4.38554	65.4074	75.7005	77.4183	24.6728	0.00131406	up
hsa_circ_0110388	181.591	152.645	128.118	2755.42	3096.86	3259.67	24.5753	0.000609408	up
hsa-circRNA14363-22	15.6713	23.5737	29.7825	526.342	388.231	421.179	24.5647	0.00386962	up
hsa_circ_0073399	13.7297	12.2143	5.28905	218.538	150.839	210.299	24.5579	0.00474258	up
hsa-circRNA15932	2.41012	2.19431	3.82906	52.5876	51.5556	57.3503	24.4131	0.0027197	up
hsa_circ_0127585	18.3198	18.8137	14.7567	340.811	311.536	366.926	24.3935	0.000625747	up
hsa_circ_0081949	56.2751	33.5181	33.7013	731.034	865.744	767.803	24.3769	0.00147155	up
hsa_circ_0027725	13.9353	10.1345	8.89161	221.432	235.03	184.393	24.3746	0.00129808	up
hsa_circ_0087944	11.3059	13.6297	4.75958	147.65	184.299	204.004	24.2966	0.0046399	up
hsa_circ_0133154	2.70189	8.98688	3.83739	64.1453	101.77	107.719	24.2729	0.00837844	up
hsa_circ_0128829	2.35948	2.23859	3.60502	58.2647	43.3087	56.8572	24.2599	0.00295455	up
hsa_circ_0056758	19.4494	18.8974	11.9412	349.676	300.764	313.761	24.2426	0.00131904	up
hsa_circ_0013441	112.693	81.163	79.3378	1767.31	1711.8	1802.35	24.2377	0.000872667	up
hsa_circ_0035196	20.4286	10.2667	12.4298	218.782	321.233	276.536	24.1741	0.00244961	up
hsa-circRNA9090-1	2.87017	2.65525	4.06135	66.3739	48.0474	71.4946	24.078	0.00278879	up
hsa_circ_0005540	21.17	30.1182	15.731	468.5	346.755	454.396	24.0706	0.00223931	up
hsa_circ_0099192	27.3316	19.9655	13.2456	424.368	343.79	361.592	24.0038	0.00218706	up
hsa_circ_0081953	243.409	211.926	180.534	3951.54	4759.29	3594.5	23.9602	0.000888911	up
hsa_circ_0103380	4849.94	5343.14	5274.99	86016	112424	101871	23.9026	0.000717353	up
hsa_circ_0013437	45.9284	46.8203	44.1538	687.207	966.107	1018.04	23.8048	0.000777403	up
hsa_circ_0036060	55.533	61.7163	41.3885	874.394	989.348	1165.18	23.7907	0.000826715	up
hsa_circ_0028116	319.117	368.973	329.333	6694.85	6649.52	6123.78	23.706	0.000774626	up
hsa-circRNA10861-7	2.45438	2.27115	3.94738	54.0727	50.1866	56.9719	23.7016	0.00287528	up
hsa_circ_0096548	17.2471	11.8451	16.2452	258.755	293.042	304.789	23.6309	0.00126104	up
hsa_circ_0056899	3.09692	2.91351	3.76599	56.2655	53.6438	77.9292	23.5838	0.00158456	up
hsa-circRNA3239-2	2.52333	2.37194	3.56184	75.1409	44.9268	42.8586	23.4292	0.00454285	up
hsa_circ_0081951	38.1106	28.3335	20.4963	513.613	563.943	515.598	23.3841	0.00134873	up
hsa_circ_0112090	120.004	123.633	90.5688	2060.94	2031.82	2135.36	23.2759	0.000621149	up
hsa-circRNA9290-9	1416.98	1367.28	1120.63	24974.1	22103.6	26043.2	23.2375	0.00064335	up
hsa_circ_0013439	401.859	352.869	310.019	6417.64	6488.91	6920.67	23.1601	0.000537474	up
hsa-circRNA7763-4	137.917	128.278	102.244	2196.69	2606.72	2065.68	23.1406	0.00079075	up
hsa-circRNA4436-3	41.1314	40.6208	35.0746	563.935	653.378	1034.33	23.0983	0.00151557	up
hsa-circRNA9227-12	100.22	84.2256	68.09	1377.71	1786.11	1516.24	23.0843	0.000791726	up
hsa_circ_0073377	21.7975	21.2677	15.336	338.516	326.776	414.181	23.0282	0.000826715	up
hsa-circRNA5260-25	27.5897	33.5503	18.0286	472.12	349.519	646.819	22.9704	0.00300097	up
hsa_circ_0027721	23.4034	14.5598	14.6444	330.813	329.947	291.575	22.9487	0.00152686	up
hsa_circ_0016523	8.1589	7.62259	10.4614	150.25	154.663	177.933	22.9216	0.001397	up
hsa_circ_0062648	23.8399	25.9705	14.5945	440.936	305.116	424.713	22.8835	0.00226761	up
hsa_circ_0098196	11.9312	5.54807	7.83793	148.392	166.355	131.612	22.809	0.00315252	up
hsa_circ_0073578	8.73318	11.3	9.79718	162.401	199.614	185.228	22.7464	0.000877105	up
hsa_circ_0137673	11.545	19.2592	7.2366	213.319	190.904	244.663	22.7239	0.00397825	up
hsa_circ_0116321	35.9715	34.5002	13.3392	431.093	409.741	576.467	22.6734	0.00507817	up
hsa-circRNA15276-13	220.534	200.327	148.106	3270.48	3351.6	3665.97	22.6615	0.000687826	up
hsa_circ_0027587	11.7491	15.8309	8.80399	214.224	192.695	241.781	22.6043	0.0015583	up
hsa_circ_0013443	395.887	380.78	340.926	6552.74	6962.73	6762.55	22.4907	0.000537474	up
hsa_circ_0019256	26.1762	26.6589	27.2296	467.749	549.297	442.213	22.4606	0.000832867	up
hsa_circ_0002245	101.903	79.6043	94.4261	1415.17	1736.21	1847.44	22.3936	0.000877105	up
hsa_circ_0032518	4.94525	5.41763	4.07006	62.228	93.6082	110.556	22.3681	0.00133309	up
hsa_circ_0067761	2.8802	2.7633	3.65447	75.2422	40.9954	55.3072	22.317	0.0036285	up
hsa-circRNA1967-21	758.84	705.479	678.498	12069.5	13363.4	13028.2	22.2145	0.000537474	up
hsa-circRNA1967-5	203.005	178.863	156.138	2906.36	3652.02	3043.3	22.102	0.000631797	up
hsa_circ_0116330	41.0894	32.7081	43.465	546.647	665.19	908.567	22.0477	0.00171037	up
hsa_circ_0119095	2.42412	2.26941	3.6098	62.0006	30.8998	58.3698	22.0156	0.00579463	up
hsa-circRNA9440-11	14.6959	6.22388	3.94568	121.168	137.945	120.095	21.9254	0.00758961	up
hsa-circRNA1967-39	371.885	404.132	316.061	6050.1	6349.53	6848.92	21.8948	0.000537474	up
hsa_circ_0028126	316.659	283.735	206.368	3860.37	5085.34	5183.04	21.8271	0.000889707	up
hsa_circ_0073384	13.3789	11.0999	7.42188	145.291	179.542	230.393	21.7809	0.0016828	up
hsa-circRNA10776-3	5.75827	7.45224	4.10695	84.0293	113.761	99.9091	21.7359	0.00150637	up
hsa_circ_0108992	4.66105	3.43496	3.59909	77.3979	53.1223	75.8194	21.7235	0.00175705	up
hsa-circRNA1517	9.03929	6.28952	4.17482	97.834	100.355	130.467	21.7061	0.00228212	up
hsa_circ_0108456	2.4495	2.21174	3.93168	26.9602	55.5862	76.5279	21.6891	0.00754849	up
hsa_circ_0073385	9.29442	6.15048	4.14059	83.5611	114.224	133.361	21.6804	0.00277145	up
hsa_circ_0073052	55.1329	115.408	57.6371	1625.62	908.599	1331.61	21.6608	0.00570717	up
hsa_circ_0131460	14.9673	13.0754	3.88323	164.083	160.929	152.844	21.59	0.00965705	up
hsa_circ_0027723	16.0448	17.5504	8.97112	228.569	257.516	226.217	21.5358	0.00191396	up
hsa_circ_0127419	2.63558	2.5828	4.46496	38.9355	70.1215	58.3806	21.4995	0.00424297	up
hsa_circ_0125462	2.78149	3.86813	4.23075	42.8182	61.5231	90.4983	21.4901	0.0036095	up
hsa_circ_0099519	5.8445	6.7099	4.54784	90.0166	126.924	81.6767	21.4832	0.0015877	up
hsa-circRNA15276-14	32.9865	17.9325	16.4095	321.314	420.752	375.428	21.4785	0.0023463	up
hsa_circ_0013444	447.075	432.855	359.851	6628.47	7895.8	6944.2	21.465	0.000568764	up
hsa-circRNA15276-12	118.061	34.5019	34.9387	892.27	882.513	941.652	21.4529	0.00939907	up
hsa_circ_0013450	314.251	259.707	301.945	5543.38	4488.61	5159.11	21.4516	0.00117546	up
hsa_circ_0126972	2.50057	2.36315	3.87832	52.2336	50.4692	44.9874	21.4042	0.00289157	up
hsa_circ_0127577	5.26414	7.67072	5.09024	94.1895	106.244	105.703	21.3648	0.00113851	up
hsa_circ_0073639	8.86743	7.13398	5.51439	117.854	118.784	127.568	21.3275	0.000905499	up
hsa_circ_0028114	201.341	197.733	150.174	2684.15	3356.12	3396.49	21.3251	0.000613263	up
hsa-circRNA14597	4.92023	6.56128	3.60959	80.3183	80.5335	91.776	21.2927	0.00143118	up
hsa-circRNA11242-26	7.30464	9.52788	3.59606	94.7385	131.434	101.891	21.2577	0.00425059	up
hsa_circ_0116319	25.2875	25.9635	16.6077	377.443	291.529	500.447	21.231	0.00211939	up
hsa_circ_0073579	5.98527	10.518	13.8687	151.494	189.952	152.928	21.2174	0.00543345	up
hsa-circRNA14363-3	23.0074	21.5552	15.8366	287.619	331.979	413.265	21.1946	0.000912633	up
hsa_circ_0035016	27.0188	18.3352	19.7285	318.146	452.697	339.175	21.1578	0.00138663	up
hsa-circRNA1967-8	256.036	243.544	173.683	3286.31	4188.23	3901.56	21.1016	0.000778865	up
hsa_circ_0102432	2.79874	2.58273	3.96237	73.1304	40.6148	47.6735	21.0809	0.00475041	up
hsa_circ_0097202	404.634	354.49	351.998	5378.76	6539.46	7010.82	20.9957	0.000568764	up
hsa_circ_0060010	214.76	186.32	187.416	3508.04	3084.11	3364.4	20.9522	0.000763834	up
hsa_circ_0105245	7.00876	14.1992	8.73857	155.738	189.005	142.477	20.9069	0.00327811	up
hsa_circ_0000474	2.46245	2.45364	3.70329	47.8773	47.1529	47.4695	20.8591	0.00222932	up
hsa-circRNA14084-4	11.7527	13.4186	4.01945	137.826	138.948	158.062	20.8385	0.00734777	up
hsa_circ_0099517	2.46728	2.76263	3.79013	35.55	61.52	56.3571	20.8323	0.00295879	up
hsa_circ_0048857	22.5812	17.3029	6.88279	184.466	328.159	210.167	20.7736	0.00789281	up
hsa_circ_0099196	9.59827	7.12959	17.4775	191.334	149.905	195.615	20.7153	0.00664537	up
hsa_circ_0077710	2.46487	2.4108	3.71993	43.5292	34.6109	68.2963	20.6618	0.00445702	up
hsa_circ_0045777	146.782	148.071	139.81	2034.68	2468.24	2809.22	20.6442	0.000614336	up
hsa_circ_0123086	70.5193	70.9179	63.1852	1077.69	1144.06	1188.52	20.6359	0.000462551	up
hsa_circ_0132997	85.4912	86.2948	64.5715	1145.76	1419.5	1346.96	20.5785	0.000609818	up
hsa_circ_0132995	3.87141	2.50069	3.48764	45.2657	65.5681	52.2785	20.5736	0.00185212	up
hsa_circ_0006639	21.428	31.4449	12.1035	375.745	264.858	376.57	20.5733	0.00480722	up
hsa_circ_0096536	12.2319	11.1589	4.22032	128.242	149.541	137.923	20.5679	0.00554085	up
hsa_circ_0074396	3.07125	6.26057	4.28225	66.6592	75.7397	74.7644	20.557	0.0029443	up
hsa-circRNA3628-3	3.08655	2.9069	3.75555	45.3901	54.2875	62.415	20.527	0.00132122	up
hsa-circRNA12876-4	15.8574	10.227	11.0145	188.559	181.278	236.984	20.4828	0.00138565	up
hsa-circRNA1967-20	83.6825	77.5675	65.1705	1060.15	1372.05	1312.57	20.4502	0.000568764	up
hsa-circRNA5260-10	60.8955	48.0906	43.2674	760.17	858.239	870.009	20.3992	0.000631797	up
hsa-circRNA1893-2	54.0954	46.5032	33.9286	704.082	746.009	726.915	20.3899	0.000890697	up
hsa_circ_0126765	2.40408	2.64388	3.71758	56.0265	40.7208	46.1675	20.3657	0.00308206	up
hsa-circRNA1893-9	26.1755	27.7045	18.8143	394.933	403.515	380.501	20.3456	0.000861343	up
hsa_circ_0116877	3.3441	2.72655	4.02171	52.6802	47.6402	64.8113	20.3325	0.00196879	up
hsa_circ_0047139	13.1023	17.7344	7.98122	205.444	166.502	239.177	20.2955	0.00317533	up
hsa_circ_0059355	15.5299	7.8705	5.08289	136.775	109.123	183.615	20.2947	0.00661941	up
hsa_circ_0048890	271.146	210.131	237.736	3653.51	4640.62	3514.62	20.2765	0.00113502	up
hsa_circ_0099506	29.6555	9.97732	19.969	291.495	284.169	313.649	20.2734	0.00676962	up
hsa_circ_0127915	2.46374	2.30695	4.09894	55.4546	30.743	59.1256	20.1644	0.00657124	up
hsa_circ_0129078	505.294	537.354	453.511	7886.22	7957.68	8431.41	20.1182	0.000537474	up
hsa_circ_0075633	19.2749	9.72258	7.11756	200.225	146.793	194.432	20.0985	0.00517824	up
hsa_circ_0133000	67.3645	79.5026	67.2045	1056.76	1324.73	1091.51	20.0374	0.000797446	up
hsa_circ_0056643	2.36913	2.32901	3.62216	55.2359	28.8154	52.9365	19.9906	0.00577885	up
hsa_circ_0116317	139.329	139.137	124.627	2427.68	2060.84	1992.32	19.8473	0.000967761	up
hsa_circ_0100079	25.5505	11.2415	26.0419	361.807	292.326	290.927	19.828	0.006627	up
hsa_circ_0052882	2.33566	2.24781	3.59212	42.8731	26.5956	67.6837	19.7934	0.00725704	up
hsa_circ_0125411	2.51454	2.49446	3.78292	38.4882	49.9703	50.4475	19.7882	0.0023463	up
hsa_circ_0073398	7.62238	9.24542	6.52555	116.302	108.646	148.562	19.7769	0.00109169	up
hsa_circ_0126776	2.94919	2.76301	4.12367	54.4356	45.8076	54.9043	19.7646	0.00230854	up
hsa-circRNA1967-51	281.72	273.992	263.188	4419.04	4241.34	4361.28	19.6823	0.000609408	up
hsa_circ_0020106	2.35573	2.19832	3.80777	47.1628	29.5333	56.8694	19.6714	0.00579311	up
hsa_circ_0045778	193.573	126.302	122.591	2198.59	2278.48	2382.22	19.6134	0.00120966	up
hsa_circ_0126905	5.08042	2.96393	4.10282	72.721	52.8559	63.8423	19.5977	0.00269795	up
hsa_circ_0081952	38.6304	42.0639	32.7508	481.184	702.438	620.996	19.5517	0.000813277	up
hsa_circ_0096535	28.4985	21.4166	14.7394	321.479	353.322	311.59	19.5353	0.0016927	up
hsa_circ_0071586	9.72144	4.75417	3.61175	55.8436	94.0576	124.883	19.5277	0.00696803	up
hsa_circ_0133349	3.34695	6.16124	3.78828	67.5293	76.044	59.4633	19.4932	0.0027197	up
hsa_circ_0028122	228.226	212.598	200.38	2801.56	3869.08	3460.39	19.4082	0.000625747	up
hsa_circ_0095422	42.0041	27.363	22.388	438.152	413.832	543.653	19.3628	0.00187694	up
hsa_circ_0062657	108.366	85.7227	90.6573	1437.43	1488.05	1501.04	19.3317	0.000663584	up
hsa_circ_0138230	4.777	5.2622	3.95755	54.8449	54.4397	126.838	19.322	0.00450245	up
hsa-circRNA1967-13	263.582	271.381	214.337	3226.06	4458.59	4048.59	19.3076	0.000646311	up
hsa_circ_0041839	5.53237	3.62313	5.02066	69.3975	75.6595	72.1348	19.2486	0.00153347	up
hsa_circ_0035018	2.4861	2.4788	3.72562	38.2876	72.1888	31.1037	19.2159	0.00641747	up
hsa_circ_0102809	2.41516	2.17238	3.98519	39.7629	50.5801	38.355	19.1213	0.00400925	up
hsa_circ_0119256	9.20978	9.02037	7.6497	79.8956	125.029	234.46	19.1145	0.00505614	up
hsa_circ_0127598	9.1274	13.4363	16.8568	191.447	201.399	197.206	19.1018	0.00326623	up
hsa_circ_0023523	189.81	161.327	88.5922	2018.26	1979.6	2490.81	19.0851	0.00252765	up
hsa_circ_0009638	36.0787	34.9445	28.5318	567.631	361.332	629.869	18.9506	0.00230829	up
hsa-circRNA1967-26	73.2188	66.8481	51.2154	821.579	1089.87	1004.58	18.9452	0.00074474	up
hsa_circ_0062656	19.927	27.8955	18.7771	307.813	307.549	394.055	18.9199	0.00129248	up
hsa_circ_0094605	124.545	78.5785	48.6389	1003.66	1370.21	1236.09	18.9149	0.00365467	up
hsa_circ_0048862	29.6013	30.0639	21.9465	343.59	525.735	385.457	18.9041	0.00122414	up
hsa-circRNA15276-9	464.556	415.458	359.77	5853.93	7052.61	5955.32	18.8613	0.000625747	up
hsa_circ_0060012	55.9032	49.4381	27.0897	655.465	570.098	706.593	18.836	0.0025012	up
hsa_circ_0073393	8.00086	14.9965	13.124	202.125	135.327	202.543	18.8211	0.0047313	up
hsa_circ_0060877	28.7634	42.8026	25.3269	470.847	506.717	459.538	18.8174	0.00156713	up
hsa_circ_0073396	17.4023	25.342	24.6558	397.209	296.116	323.887	18.7948	0.0026255	up
hsa_circ_0037517	29.8011	28.535	20.2081	347.491	425.928	405.548	18.7757	0.000777403	up
hsa_circ_0027722	37.8701	15.1541	29.1107	376.261	400.325	386.277	18.7575	0.00531361	up
hsa_circ_0079444	2.54959	2.38517	3.892	41.1339	35.3471	56.3534	18.7199	0.00372075	up
hsa_circ_0013446	272.892	208.824	146.633	3161.17	2920.57	3098.56	18.6505	0.00159915	up
hsa_circ_0131719	3.31148	2.33028	3.64228	47.1395	49.4213	41.0995	18.62	0.00231112	up
hsa-circRNA2280-3	11.8904	10.825	4.77312	130.908	166.071	95.8965	18.5957	0.00607496	up
hsa-circRNA14363-37	10.1054	10.478	7.30774	132.218	125.67	157.559	18.5774	0.000906912	up
hsa-circRNA6481-3	6.64147	4.59879	3.62131	69.929	59.5512	89.7878	18.5722	0.00217725	up
hsa_circ_0108360	2.82211	2.60576	4.296	67.8963	34.9538	44.885	18.5563	0.00636779	up
hsa_circ_0116325	96.4346	97.6383	86.1195	1434.74	1343.49	1411.93	18.5278	0.000609408	up
hsa_circ_0028103	213.955	190.734	171.131	2730.04	3126.8	2742.5	18.5202	0.000609408	up
hsa_circ_0130607	7.77204	3.21395	3.84464	73.5053	61.2057	71.3895	18.5057	0.00473337	up
hsa_circ_0073379	22.3533	24.313	15.6937	324.917	275.18	317.635	18.4787	0.00123708	up
hsa_circ_0110382	118.22	105.756	55.3657	1322.34	1316.78	1317.4	18.4493	0.00258375	up
hsa_circ_0048865	23.8807	28.2731	16.2391	267.196	371.024	363.494	18.3986	0.00150626	up
hsa_circ_0087940	18.4171	33.7261	18.3265	334.539	326.776	342.007	18.3946	0.00261031	up
hsa_circ_0079245	28.2269	35.5153	32.2233	501.267	417.466	501.642	18.3293	0.00127278	up
hsa_circ_0132635	7.59888	5.52178	4.67118	111.429	53.2759	106.7	18.2956	0.00534313	up
hsa_circ_0100930	3.00779	3.83055	3.72802	65.7636	46.4366	45.1619	18.2563	0.00262224	up
hsa_circ_0129197	7.96557	6.88049	4.57985	60.9077	98.3494	134.364	18.2479	0.00341135	up
hsa-circRNA15276-16	467.41	473.381	408.098	5706.72	7076.32	7135.98	18.219	0.000537474	up
hsa_circ_0070670	569.336	558.604	563.327	9894.92	6443.06	8924.16	18.1892	0.00189885	up
hsa_circ_0028106	31.756	35.8879	43.7173	432.087	600.795	608.99	18.1842	0.00176238	up
hsa_circ_0127201	4.6763	2.80535	4.56539	72.4959	46.2829	56.4905	18.1683	0.00422805	up
hsa_circ_0126493	25.8361	28.9559	29.0065	293.102	501.766	466.685	18.1647	0.00167314	up
hsa-circRNA6174-2	7.15331	6.01028	3.79087	39.7637	95.854	134.936	18.1508	0.00894311	up
hsa_circ_0040844	288.61	279.35	304.619	4762.98	3866.96	4198.77	18.1378	0.00122089	up
hsa_circ_0021523	17.9718	12.3643	6.0427	142.846	181.254	161.746	18.08	0.0053082	up
hsa_circ_0048859	74.449	80.7308	56.245	874.187	1106.17	1075.89	18	0.000749154	up
hsa_circ_0106121	511.453	470.299	534.968	8394.58	6573.03	7033.2	17.8788	0.00143191	up
hsa-circRNA10578-3	207.36	148.047	182.213	2502.49	2645.12	2547.31	17.8758	0.00112908	up
hsa_circ_0038319	30.7276	29.6306	23.9641	373.468	448.338	385.688	17.7673	0.000614336	up
hsa-circRNA1967-17	85.9017	82.3759	47.2279	843.133	818.072	1425.29	17.7309	0.00324759	up
hsa_circ_0137164	13.1317	13.5382	11.5487	190.233	190.706	164.518	17.6611	0.000808357	up
hsa_circ_0134911	10.4697	10.7243	11.6932	136.269	138.438	201.379	17.6338	0.00138862	up
hsa_circ_0110383	282.136	256.197	264.091	3116.14	4211.88	4177.02	17.5897	0.000711305	up
hsa-circRNA1967-52	78.5553	82.7364	89.8614	1304.34	1074.4	1191.66	17.564	0.0013071	up
hsa-circRNA1749-3	2.58002	2.51159	3.49052	54.4873	34.2698	34.4057	17.5251	0.00425757	up
hsa_circ_0140170	4.45347	5.15387	4.02249	51.6432	69.1364	73.1396	17.5005	0.000821791	up
hsa-circRNA6883-3	110.155	90.894	84.482	1214.8	1289.24	1521.6	17.4775	0.000632396	up
hsa_circ_0011316	433.297	381.052	397.198	5502.64	5783.93	5775.43	17.4476	0.000609408	up
hsa_circ_0048856	48.0264	26.699	25.6746	399.192	505.331	457.223	17.4449	0.00227523	up
hsa-circRNA4989	412.746	241.629	304	3982.96	4652.92	4577.89	17.4381	0.00170843	up
hsa-circRNA15174-15	7.21113	7.18978	4.03351	76.1796	79.8976	95.8263	17.4189	0.00177706	up
hsa_circ_0127848	5.10905	3.62246	3.57642	47.3432	50.7516	76.7236	17.4107	0.0017809	up
hsa_circ_0091279	2.60581	2.54912	3.79342	42.5355	40.6574	40.3083	17.3716	0.00241723	up
hsa-circRNA1967-31	81.0107	93.5348	71.8159	1133.09	1166.79	1126.55	17.3098	0.000645951	up
hsa_circ_0119109	120.223	71.0083	91.9456	1333.56	1195.5	1335.56	17.2584	0.00197291	up
hsa_circ_0033089	100.833	96.091	70.854	1276.07	1089.02	1332.4	17.2253	0.00101819	up
hsa_circ_0062661	24.021	21.6529	10.7686	221.518	258.182	262.985	17.2003	0.00299353	up
hsa_circ_0116333	52.7139	48.6961	45.4434	713.125	657.168	667.961	17.1963	0.000663584	up
hsa_circ_0133006	554.451	579.103	448.956	6799.34	7579.8	7495.96	17.1887	0.000537474	up
hsa_circ_0028112	440.028	446.462	369.783	5343.7	6364.31	5707.9	17.172	0.000542798	up
hsa_circ_0120810	57.8468	55.6691	26.5587	586.72	644.113	602.343	17.1493	0.0031263	up
hsa-circRNA9440-2	22.1839	14.4751	7.98852	164.205	202.383	205.226	17.1431	0.00459384	up
hsa_circ_0075697	57.691	50.1905	49.838	619.561	704.759	878.001	17.1387	0.000777403	up
hsa_circ_0051712	3.1473	2.94481	3.83537	42.554	44.9253	49.1463	17.1096	0.00132122	up
hsa_circ_0110387	241.607	227.74	173.261	2831.62	2504.65	3544.17	17.0956	0.00114498	up
hsa_circ_0073382	2.88053	2.74011	3.56384	33.7728	41.4643	52.6625	17.0633	0.00182165	up
hsa_circ_0110393	37.6708	51.4908	40.6179	559.413	532.322	693.545	17.0626	0.00129248	up
hsa_circ_0110384	132.333	127.435	93.7167	1545.23	1578.94	1693.13	17.0461	0.000663883	up
hsa-circRNA1967-40	1051.98	867.408	1063.25	13378.2	13705.2	13794.8	17.0312	0.000996484	up
hsa_circ_0119106	40.8837	31.9194	29.367	446.7	470.141	473.666	17.0066	0.00069262	up
hsa-circRNA10235	2.97481	6.78397	4.12178	62.2385	60.1921	56.8919	16.9333	0.00468773	up
hsa_circ_0040563	3.00418	5.36798	3.63062	47.5065	54.2071	58.1946	16.9275	0.00227947	up
hsa-circRNA14579-1	32.2137	40.0887	40.9442	474.182	600.537	471.557	16.8832	0.0015189	up
hsa_circ_0042077	2.37908	3.71739	3.6666	51.3626	38.3193	41.829	16.8815	0.00341586	up
hsa-circRNA8643-3	90.6593	82.7701	61.0972	1122.23	943.869	1096.16	16.8677	0.00112908	up
hsa_circ_0096541	2.59441	8.50887	3.82529	55.1562	64.8596	59.7513	16.8648	0.00945289	up
hsa_circ_0028104	124.377	118.568	110.016	1376.07	1685.86	1770.12	16.8643	0.000537474	up
hsa_circ_0075636	25.327	16.1668	18.1393	207.918	279.922	322.229	16.8509	0.00173504	up
hsa-circRNA3628-9	14.6106	20.7134	26.484	278.657	254.378	285.315	16.8471	0.00356264	up
hsa-circRNA412-18	4.52435	2.86144	4.52664	31.761	53.3813	87.0938	16.8391	0.00695132	up
hsa_circ_0139124	3.04681	2.29237	3.87227	55.0974	30.2914	40.7742	16.8312	0.00570119	up
hsa_circ_0102475	2.85003	2.6564	4.01822	46.3743	39.946	41.1736	16.8112	0.00267434	up
hsa_circ_0049240	76.7886	61.7722	64.0836	909.944	723.418	1145.08	16.7495	0.0016558	up
hsa_circ_0048897	834.415	642.106	761.185	9156.73	12181.1	9062.78	16.747	0.00136561	up
hsa-circRNA15930-3	49.5522	37.1309	27.5456	509.602	550.296	446.987	16.735	0.00175705	up
hsa_circ_0013436	174.215	153.635	108.139	1983.38	1834.41	1955.01	16.6993	0.00116017	up
hsa_circ_0099440	16.133	15.7349	6.28987	107.479	182.393	199.625	16.6844	0.00686198	up
hsa_circ_0062659	83.176	86.5725	56.1195	902.93	1011.61	1074.23	16.6325	0.000939705	up
hsa_circ_0027582	56.0105	50.9654	44.4146	555.662	763.558	724.174	16.6217	0.00064319	up
hsa_circ_0012008	4.18445	3.6358	4.16989	55.5527	49.1291	55.9969	16.5888	0.00102439	up
hsa_circ_0113440	6.76176	6.24873	4.44611	72.7091	73.8364	84.0395	16.5719	0.00088685	up
hsa_circ_0048885	394.356	410.257	361.569	5029.54	5626.62	4923.66	16.5263	0.000613263	up
hsa-circRNA3239-8	2.36152	2.25014	3.61918	32.1415	34.9205	40.4307	16.4747	0.00291456	up
hsa-circRNA9827-2	2.71174	3.91834	4.04389	37.3704	63.105	42.99	16.4742	0.00329528	up
hsa_circ_0048883	275.391	279.657	221.505	2908.28	4218.66	3279.28	16.4719	0.000939705	up
hsa_circ_0055957	6.26159	5.31842	4.05166	44.3121	81.1777	88.392	16.4674	0.00275027	up
hsa_circ_0025438	28.0565	34.9349	9.97927	295.242	277.865	277.391	16.3973	0.00938754	up
hsa_circ_0028127	397.013	367.578	306.434	4863.76	4679.04	4567.19	16.3919	0.000663883	up
hsa_circ_0001419	2.61666	2.56406	3.67695	57.402	35.1236	28.4191	16.388	0.00663196	up
hsa_circ_0060008	227.718	176.291	155.556	2578.51	2145.91	2604.82	16.3537	0.0012066	up
hsa_circ_0099511	10.2797	5.16273	3.99917	77.4616	90.4701	69.5253	16.3244	0.0050242	up
hsa_circ_0057082	7.7176	8.26986	16.1855	115.979	126.256	159.206	16.2316	0.00633666	up
hsa-circRNA9440-16	5.14965	3.64272	3.91656	48.8505	58.6576	57.594	16.2065	0.000957557	up
hsa_circ_0013445	268.294	266.387	175.13	2750.85	3101.32	3284.07	16.1876	0.000967761	up
hsa-circRNA9440-7	16.6069	26.4395	15.0011	225.406	234.291	275.383	16.1138	0.00201019	up
hsa_circ_0125408	22.3519	15.8436	28.3112	277.14	261.434	301.37	16.0403	0.00326609	up
hsa-circRNA8643-33	138.437	119.044	76.7254	1430.18	1319.2	1458.88	16.0377	0.00163199	up
hsa-circRNA14107-1	1127.95	904.144	973.602	13583.5	11903.3	13332.5	16.0237	0.000978577	up
hsa_circ_0023839	27.9535	27.9803	20.7526	354.465	327.435	302.658	16.0066	0.00104193	up
hsa_circ_0123083	22.8664	27.805	21.1959	273.835	346.116	307.508	16.0029	0.000797446	up
hsa_circ_0116310	42.8731	39.8696	29.6086	459.647	411.776	577.467	15.9952	0.00122178	up
hsa_circ_0089818	79.7662	89.5976	58.2161	906.37	961.037	1026.09	15.967	0.000915284	up
hsa_circ_0096582	2.90778	2.45059	3.49904	26.1378	35.7778	56.9749	15.939	0.00423394	up
hsa_circ_0068484	11.2185	9.7234	4.17109	95.1619	88.5578	115.223	15.9322	0.00560731	up
hsa_circ_0134912	15.4234	23.2208	13.1587	201.895	238.93	207.909	15.9172	0.00186772	up
hsa_circ_0119112	101.985	88.6661	81.7446	1050.67	1170.27	1278.76	15.9147	0.000537474	up
hsa_circ_0091432	2.68579	3.59371	3.8932	21.2023	55.9458	67.3034	15.9082	0.0098315	up
hsa_circ_0117477	7.33625	2.79978	4.19107	34.3042	65.8904	80.4128	15.8754	0.00952765	up
hsa-circRNA4991-2	414.042	370.132	304.906	4193.68	4818.93	4838.24	15.8279	0.000568764	up
hsa-circRNA10861-15	2.86928	2.62043	4.21004	50.3581	31.2491	41.9123	15.8054	0.00491512	up
hsa_circ_0127584	2.34807	2.24883	3.65699	32.1365	37.6943	33.055	15.78	0.00319542	up
hsa-circRNA7736-2	8.73235	14.0871	4.74399	91.3117	100.239	132.132	15.777	0.00647737	up
hsa_circ_0057081	2.69382	5.31506	3.66174	57.2734	37.7512	49.6944	15.7185	0.00502547	up
hsa_circ_0113037	91.3875	81.8595	63.4246	944.367	1075.33	956.685	15.7137	0.000774626	up
hsa-circRNA2874-3	24.782	13.8958	11.2428	194.768	196.023	207.183	15.7023	0.00309555	up
hsa_circ_0077957	9.57494	5.83418	3.61628	65.0123	68.7584	92.1927	15.6945	0.00482782	up
hsa_circ_0023823	23.4208	28.7083	24.1001	303.42	332.98	327.021	15.6917	0.000721908	up
hsa_circ_0132992	39.4376	37.5477	36.3685	437.13	517.423	483.864	15.6743	0.000537474	up
hsa_circ_0121759	66.4747	61.557	57.7339	804.393	660.335	901.416	15.6603	0.00105713	up
hsa_circ_0137165	29.9124	27.578	24.2929	343.426	350.439	336.658	15.6476	0.000568764	up
hsa_circ_0087943	26.6935	26.7825	17.8356	261.148	286.212	338.765	15.5541	0.00104573	up
hsa_circ_0028121	343.218	302.834	268.662	3280.76	4038.34	4182.09	15.55	0.000568764	up
hsa-circRNA14546-14	2.36405	2.25397	3.67465	32.7886	36.9748	31.9802	15.5393	0.00328137	up
hsa_circ_0028119	171.949	144.04	128.736	1939.43	2006.53	1616.84	15.5216	0.00112466	up
hsa_circ_0130597	2.64441	4.93898	4.76388	60.6923	42.96	47.0688	15.5192	0.00577023	up
hsa_circ_0012215	2.78424	6.95807	4.31702	38.5867	53.4524	79.9606	15.518	0.00843678	up
hsa_circ_0048876	580.04	557.999	446.281	5207.8	8129.67	6714.82	15.508	0.00109173	up
hsa-circRNA14107-2	1105.13	1076.65	1003.43	13398.4	11225	15578.5	15.4928	0.00105393	up
hsa_circ_0081375	6.42627	3.27549	4.20329	51.2806	63.4804	53.0451	15.4646	0.00293232	up
hsa_circ_0060014	416.486	395.224	343.162	4565.93	5148.68	4686.13	15.4608	0.000537474	up
hsa_circ_0132993	35.8047	39.3079	24.2423	401.73	494.051	333.787	15.4381	0.00209671	up
hsa-circRNA4991-3	349.614	288.484	247.972	3523.55	3778.83	3642.34	15.4313	0.000670239	up
hsa_circ_0132636	5.43726	2.86985	5.21017	71.5864	39.3507	55.9512	15.4301	0.00727432	up
hsa_circ_0060011	46.3673	35.794	30.8921	496.004	406.492	492.818	15.4283	0.00132595	up
hsa-circRNA14107-3	933.235	955.159	793.468	11693.2	9286.42	12561.1	15.403	0.00113734	up
hsa-circRNA958-6	72.5451	49.4815	29.9673	608.051	605.043	563.042	15.3954	0.00369486	up
hsa_circ_0035434	10.044	4.7269	9.50077	105.907	87.1534	93.8679	15.3826	0.00593417	up
hsa_circ_0048867	159.037	153.916	109.617	1688.79	1704.24	1790	15.3804	0.000808357	up
hsa-circRNA6358-110	2.59325	2.33972	4.13574	44.9104	39.4151	27.2072	15.3784	0.00645809	up
hsa_circ_0116324	22.9856	17.734	12.8554	248.539	162.733	246.959	15.3432	0.00316457	up
hsa-circRNA13560-3	3.41562	5.77046	3.64889	62.1739	52.994	41.4954	15.3296	0.00380934	up
hsa_circ_0046935	12.792	8.42635	3.88151	74.8774	97.5405	108.829	15.3262	0.00772091	up
hsa_circ_0048892	483.377	355.554	383.993	4450.28	5805.21	4844.59	15.3174	0.00109173	up
hsa_circ_0099510	27.2144	22.2152	17.2088	230.706	323.403	263.694	15.3027	0.00127175	up
hsa_circ_0028102	1253.02	1084.1	977.739	11804.5	14156.5	15023.9	15.3008	0.000568764	up
hsa_circ_0060009	97.1452	71.6482	71.1402	987.908	934.869	1010.66	15.2866	0.000967761	up
hsa_circ_0013440	103.839	120.123	71.1334	1177.79	1195.63	1185.45	15.2767	0.00134166	up
hsa_circ_0112394	9.66286	22.7429	10.6896	127.891	215.498	159.705	15.2556	0.00666228	up
hsa-circRNA15162-118	134.907	110.522	118.263	1392.08	1585.46	1494.84	15.2485	0.000663883	up
hsa-circRNA14084-5	22.2279	16.2468	10.3506	186.547	188.716	197.791	15.2262	0.00251725	up
hsa-circRNA9440-13	84.1855	63.5516	70.3005	877.546	981.678	813.205	15.2256	0.00113502	up
hsa_circ_0029874	5.18443	7.41759	3.77166	57.5419	62.3927	75.1802	15.221	0.00230316	up
hsa-circRNA6883-5	97.7357	83.8995	47.0121	839.643	841.532	1009.72	15.1932	0.00260558	up
hsa_circ_0040845	450.339	399.543	347.591	5646.91	4605.9	4445.15	15.1873	0.00132595	up
hsa_circ_0040840	218.079	187.279	194.694	2417.8	2437.41	2493.46	15.1856	0.000631797	up
hsa_circ_0126777	3.82677	2.91374	3.67968	57.0637	30.7637	43.1893	15.1855	0.00432452	up
hsa-circRNA4696-1	7.27819	4.29277	3.97888	60.2125	58.9936	64.5948	15.1795	0.00212642	up
hsa-circRNA11940-8	463.694	382.831	299.181	4111.48	5499.67	4283.95	15.1195	0.00125797	up
hsa_circ_0068478	31.5004	27.5352	28.1993	382.644	345.342	337.233	15.114	0.000939705	up
hsa_circ_0048874	565.282	510.158	527.955	6086.03	7197.15	6330.97	15.1124	0.000645951	up
hsa_circ_0010519	12.0134	4.95174	9.18068	87.643	97.9155	115.24	15.0832	0.00587106	up
hsa-circRNA3005-2	2.41411	2.2655	3.83878	27.3067	27.0924	51.1287	15.0576	0.00634983	up
hsa_circ_0062663	69.1295	54.9136	39.6341	679.984	619.602	640.404	15.0344	0.00156426	up
hsa-circRNA15930-8	5.70824	6.45642	3.82118	60.5229	78.0529	53.3744	15.0263	0.00217616	up
hsa_circ_0095645	86.6939	80.5772	103.392	958.128	1301.87	1036.28	15.0242	0.00165673	up
hsa_circ_0062647	134.988	109.358	72.3999	1336.55	944.841	1513.27	15.0196	0.00325398	up
hsa_circ_0140725	43.536	45.4913	40.9957	561.189	518.619	496.963	15.0011	0.000843065	up
hsa_circ_0131364	191.713	136.203	107.596	1170.26	2068.99	2043.53	14.9438	0.00296524	up
hsa-circRNA757-4	2.79716	2.61514	3.55601	30.3199	42.5037	34.9114	14.8542	0.00199562	up
hsa_circ_0028100	218.951	216.194	190.111	2508.3	2595.75	2390.02	14.8531	0.000613263	up
hsa_circ_0124995	2.78786	2.38441	4.82693	52.0543	28.9358	36.5783	14.8183	0.00906169	up
hsa_circ_0137018	11.8102	6.66758	7.12242	83.0171	124.23	92.77	14.786	0.00281493	up
hsa_circ_0127067	21.0944	11.396	19.018	180.56	204.78	210.46	14.7752	0.00328784	up
hsa_circ_0139153	3.29909	5.2141	3.59382	64.6767	30.7437	52.872	14.7707	0.00658873	up
hsa_circ_0013435	102.898	88.0904	60.2449	976.711	902.055	1051.61	14.7593	0.0014278	up
hsa_circ_0011319	60.4288	44.6997	48.1463	607.975	635.789	567.733	14.7325	0.00108089	up
hsa-circRNA3239-10	2.94576	2.76575	4.13011	42.4656	37.2947	35.779	14.7225	0.00294562	up
hsa-circRNA10861-6	2.47913	2.37515	3.80685	33.4315	29.3698	38.3871	14.7151	0.00355559	up
hsa_circ_0138899	2.96311	4.6186	4.06778	37.7041	45.4188	54.5256	14.7029	0.00236295	up
hsa_circ_0099520	11.2983	15.4802	9.44756	145.171	154.875	122.196	14.6601	0.00192117	up
hsa-circRNA9290-4	1498.62	1337.67	1125.53	15796.1	15331.3	15489.8	14.6598	0.000651177	up
hsa-circRNA12807-10	13.9715	14.8399	5.19285	84.734	144.103	145.98	14.6392	0.0088802	up
hsa_circ_0119108	73.0866	75.2333	64.7938	819.488	805.039	886.553	14.5981	0.000568764	up
hsa_circ_0058160	153.818	153.865	93.8404	1523.3	1485.02	1607.5	14.5852	0.00142649	up
hsa_circ_0097201	1973.99	1670.57	1727.07	20249	20546.7	22408	14.584	0.000621149	up
hsa_circ_0027583	22.3114	14.3857	18.6168	193.506	206.906	243.573	14.5695	0.00167283	up
hsa_circ_0116309	62.1872	52.522	43.8046	622.116	523.801	715.918	14.5651	0.00124444	up
hsa-circRNA5800-3	50.9738	59.5557	57.3101	354.058	679.524	1178.3	14.5617	0.00846615	up
hsa_circ_0102258	6.52039	3.16349	3.87097	48.6484	50.8846	52.5113	14.5574	0.00325591	up
hsa_circ_0138590	7.66128	2.79559	3.67947	65.3809	46.8623	41.7418	14.5422	0.00947134	up
hsa_circ_0126779	2.51944	6.49176	3.75714	46.0783	44.9209	47.9601	14.52	0.00663467	up
hsa_circ_0140167	79.2076	67.1826	58.8504	890.901	774.044	722.77	14.448	0.00125363	up
hsa_circ_0048879	757.697	612.628	639.829	6352.41	9229.34	8037.23	14.4329	0.00102439	up
hsa_circ_0096540	6.6417	10.5884	3.68259	77.3768	76.1783	69.1366	14.3934	0.00637439	up
hsa_circ_0083444	29.7527	20.3203	16.4921	214.996	275.566	264.713	14.3913	0.00169482	up
hsa_circ_0089817	233.402	184.292	242.371	2527.02	2520.31	2553.05	14.3508	0.00137018	up
hsa-circRNA1236-2	23.7346	25.9841	27.9464	203.877	285.228	461.016	14.338	0.00392568	up
hsa_circ_0102263	9.19793	8.48752	5.09171	76.8073	87.0393	92.4449	14.3358	0.00169318	up
hsa_circ_0073580	5.21157	5.37921	8.35305	51.3602	77.6532	91.1063	14.3263	0.00459117	up
hsa_circ_0048900	495.629	448.444	303.936	3818.32	6124.37	4463.34	14.3059	0.00201827	up
hsa_circ_0062658	139.872	129.549	105.737	1266.33	1459.24	1593.34	14.2801	0.000568764	up
hsa-circRNA7601-6	10.6034	14.9521	6.82055	118.187	133.805	104.928	14.2733	0.00355559	up
hsa_circ_0048858	125.658	130.295	93.1222	1081.31	1699.54	1272.01	14.2693	0.00144837	up
hsa_circ_0137030	2.72424	2.47376	4.15618	34.7882	33.5567	36.4598	14.2269	0.0035061	up
hsa_circ_0109408	2.8472	2.40056	4.5127	23.9844	42.0036	46.1893	14.1927	0.00667043	up
hsa_circ_0028124	786.557	676.131	629.042	7570.3	7885.07	8430.32	14.1789	0.000568764	up
hsa-circRNA15190-4	49.4907	30.5072	38.7402	454.135	429.712	446.492	14.1329	0.00190044	up
hsa_circ_0081947	63.8202	59.8762	53.1933	650.997	658.616	692.891	14.0433	0.000537474	up
hsa_circ_0132639	3.093	2.75366	3.72743	39.4352	32.0986	36.6058	14.037	0.00214498	up
hsa_circ_0063717	2.8991	2.52068	4.13219	30.0839	32.1371	45.4586	14.0238	0.00379642	up
hsa-circRNA1967-30	817.366	763.53	818.261	8946.11	8671.08	9579.93	14.0232	0.000766242	up
hsa-circRNA11940-64	279.861	301.394	226.133	2992.99	3516.03	2636.87	14.0218	0.00118943	up
hsa_circ_0028128	150.353	142.589	138.825	1649.27	1658.68	1579.09	14.0109	0.000632396	up
hsa_circ_0028107	222.407	181.493	142.42	1952.55	2165.07	1963.15	13.9857	0.00102404	up
hsa_circ_0114583	195.828	165.52	211.677	1558.57	2287.77	2770.32	13.973	0.0023539	up
hsa_circ_0025419	37.7584	41.7871	31.5342	364.991	384.095	508.729	13.9527	0.000983399	up
hsa-circRNA6164	24.5098	21.7797	8.0037	178.571	184.099	185.46	13.9319	0.00827924	up
hsa_circ_0125606	3.49973	4.89593	4.7647	50.9048	44.9406	50.7154	13.9127	0.00206558	up
hsa_circ_0031315	3.00684	3.0212	4.32469	34.139	40.2604	40.5251	13.9018	0.0023496	up
hsa_circ_0000903	86.1754	90.3674	67.1438	909.311	990.191	819.253	13.8788	0.000966188	up
hsa-circRNA13721-7	82.1964	97.6429	66.7158	603.47	1084.97	1141.7	13.8304	0.00271935	up
hsa_circ_0121704	6.76009	2.26228	3.85175	41.1839	43.8071	45.5027	13.8224	0.00839344	up
hsa-circRNA7397-2	81.7989	78.3041	70.1917	798.742	726.479	1077.33	13.8119	0.00120649	up
hsa_circ_0133952	2.75642	2.73859	4.07423	20.4026	43.9855	47.5059	13.7978	0.00715797	up
hsa_circ_0048889	605.207	618.765	429.896	5374.81	7311.48	5655.88	13.7793	0.00124444	up
hsa_circ_0079022	21.5572	23.6404	14.3761	186.248	256.209	211.854	13.7767	0.00156807	up
hsa_circ_0024580	384.603	415.596	406.253	4268.58	4471.4	4684.26	13.7667	0.000663584	up
hsa-circRNA7857	5.51029	3.92863	5.84889	50.3291	53.9187	63.9869	13.7485	0.00212611	up
hsa_circ_0119104	16.9059	18.8584	10.2823	170.578	142.288	185.104	13.7455	0.00244116	up
hsa_circ_0028110	706.747	619.123	512.996	7270.94	7142.43	5917.12	13.7404	0.0012489	up
hsa_circ_0131628	50.745	45.0651	32.7354	456.349	524.308	425.889	13.7144	0.00126482	up
hsa_circ_0110959	222.159	210.813	148.871	2194.42	2056.1	2101.6	13.7103	0.00108722	up
hsa_circ_0099628	3.40906	2.54333	3.91164	36.8516	45.5147	27.4786	13.7068	0.00432793	up
hsa_circ_0094609	112.596	148.078	97.805	1264.72	1291.01	1348.29	13.6766	0.00113787	up
hsa-circRNA9526-3	144.091	105.782	115.417	1265.62	1302.43	1438.78	13.6703	0.000949451	up
hsa_circ_0132640	2.44771	2.18073	4.00739	27.8163	27.9238	37.085	13.6653	0.00498107	up
hsa_circ_0060862	32.5968	30.2311	18.2398	277.169	282.228	306.418	13.6208	0.00171779	up
hsa_circ_0095644	35.3749	25.3243	20.8582	275.801	323.188	278.971	13.6113	0.00150414	up
hsa_circ_0048861	641.587	585.377	454.846	6233.75	6764.02	5353.83	13.5797	0.0012009	up
hsa-circRNA7277-1	2.40077	4.79874	3.76851	32.9145	28.2431	61.1429	13.5373	0.00866391	up
hsa_circ_0057222	52.1355	42.2368	22.6641	380.247	384.01	447.409	13.5368	0.00361953	up
hsa-circRNA9526-1	13.4587	8.09137	7.98145	100.715	110.943	101.566	13.5253	0.00199562	up
hsa_circ_0060864	57.3017	37.018	21.6162	393.423	389.091	390.275	13.5158	0.0049764	up
hsa-circRNA1893-8	54.3068	29.347	40.9047	469.293	405.58	446.187	13.515	0.00318283	up
hsa_circ_0028120	1228.94	1097.44	1010.08	11398.9	12517.7	12432.2	13.5132	0.000537474	up
hsa-circRNA11940-19	533.424	524.905	399.545	4920.92	5975.09	4947.32	13.5067	0.000833054	up
hsa_circ_0049169	15.0255	14.6456	6.65132	107.685	107.527	164.212	13.5025	0.00540236	up
hsa_circ_0127588	20.742	17.1742	13.5622	188.206	162.547	204.914	13.4972	0.00128641	up
hsa-circRNA10776-2	37.3729	39.2007	41.8065	485.386	438.355	372.869	13.4894	0.00173613	up
hsa-circRNA11231-9	937.145	922.752	897.203	10952.4	9268.78	9862.26	13.4723	0.00102307	up
hsa_circ_0115382	91.2845	82.8501	72.2134	885.096	811.273	978.048	13.4567	0.000709572	up
hsa_circ_0102106	2.38385	2.24404	3.61062	26.2129	24.4304	38.6256	13.4383	0.00460828	up
hsa_circ_0080824	2.54222	6.26749	3.73615	51.709	30.4911	48.2559	13.4293	0.00978048	up
hsa_circ_0060863	36.648	35.3664	12.5232	213.467	350.669	276.114	13.4129	0.00960142	up
hsa_circ_0117476	4.44549	8.26824	3.83323	57.1153	37.0446	84.6597	13.4056	0.0092048	up
hsa_circ_0060870	22.5494	21.5147	17.6598	195.684	217.991	251.217	13.3331	0.000609408	up
hsa_circ_0088701	12.541	14.7505	11.6232	133.017	170.701	118.118	13.3209	0.00153506	up
hsa-circRNA15190-6	12.7754	12.8115	14.3354	124.886	139.423	166.008	13.2658	0.00109353	up
hsa-circRNA9645-24	2.9141	2.79929	4.19488	35.6309	32.2453	36.6704	13.2632	0.00291576	up
hsa-circRNA15162-38	352.348	285.618	285.237	3173.61	3197.85	3477.28	13.2565	0.000663584	up
hsa-circRNA10861-2	8.32715	11.136	6.72666	80.957	93.385	100.983	13.2369	0.00141559	up
hsa_circ_0067117	6.19877	6.10559	3.56737	48.6926	52.3817	64.5635	13.2216	0.00194174	up
hsa_circ_0137031	2.34278	2.24005	3.67314	24.0336	27.9998	34.5693	13.1749	0.00398408	up
hsa-circRNA1967-45	383.613	381.611	318.593	3470.95	4027.88	4012.75	13.1605	0.000462551	up
hsa-circRNA6626	6.56271	7.33904	4.32152	58.2048	53.4856	80.2084	13.1488	0.00231778	up
hsa_circ_0132996	25.7996	23.2391	17.1239	258.395	254.364	185.581	13.1063	0.00220257	up
hsa_circ_0048906	1350.59	1055.09	1052.85	10044.6	13683.1	12917	13.0888	0.00092109	up
hsa-circRNA15190-2	4.71528	2.92376	3.59765	33.5338	32.3248	53.9597	13.074	0.00338907	up
hsa_circ_0080949	27.4923	32.5289	43.5612	385.812	325.629	362.839	13.04	0.00341521	up
hsa_circ_0048896	1375.74	1059.52	997.161	11138	12888.7	11828.7	13.0331	0.000833054	up
hsa_circ_0133332	53.0415	34.44	24.1107	338.784	404.745	374.561	13.0251	0.00308414	up
hsa_circ_0080823	19.2649	15.0502	13.989	141.246	155.429	212.736	12.9703	0.00135202	up
hsa_circ_0099518	36.3361	13.1748	22.6166	193.481	301.12	213.976	12.9702	0.00897658	up
hsa_circ_0140168	71.5451	62.1936	40.0482	595.666	541.6	632.241	12.9445	0.00184989	up
hsa-circRNA1967-1	413.381	374.346	320.128	3667.88	4064.71	3782.04	12.9204	0.000568764	up
hsa_circ_0116572	33.0543	25.6641	27.6576	266.912	327.43	305.09	12.9137	0.000848406	up
hsa-circRNA3279-9	248.128	208.537	200.346	2450.52	2024.79	2367.32	12.9009	0.00109353	up
hsa_circ_0116335	23.3111	14.5122	15.5274	177.289	180.111	186.308	12.8989	0.00167471	up
hsa_circ_0133922	2.53388	2.98143	3.74795	42.7819	24.579	30.4743	12.8959	0.00572861	up
hsa_circ_0115452	434.609	303.108	223.444	3200.34	3317.54	3136.88	12.8948	0.00219033	up
hsa_circ_0042376	21.2418	15.467	7.7031	139.435	140.622	146.036	12.8946	0.00579638	up
hsa_circ_0060865	2.3643	2.22264	3.75275	17.0316	34.4098	38.0163	12.8883	0.00811458	up
hsa_circ_0099191	119.342	79.1882	75.1357	1001.09	877.4	912.63	12.8851	0.0018445	up
hsa_circ_0077211	11.7236	14.6743	14.6874	150.23	127.756	148.605	12.8846	0.00172861	up
hsa_circ_0028123	1433.42	1365.98	1173.85	13307	14112.6	13752.9	12.8652	0.000537474	up
hsa_circ_0125717	13.0627	9.13273	6.30054	61.3744	104.842	131.248	12.8648	0.00550952	up
hsa_circ_0048863	226.336	179.157	152.585	1996.17	2045.07	1698.76	12.8543	0.00135419	up
hsa_circ_0140206	25.5826	23.6075	12.667	152.988	227.801	245.969	12.8531	0.00367491	up
hsa_circ_0040843	360.589	344.679	349.058	3936.36	3320.46	3684.17	12.8126	0.00105633	up
hsa_circ_0099521	10.6462	6.8362	10.1312	76.182	114.492	93.7668	12.8096	0.00289483	up
hsa_circ_0131932	4.69479	2.6037	4.36	31.9711	32.7557	56.3129	12.7993	0.00593927	up
hsa_circ_0119110	113.986	96.8522	81.6595	973.46	991.59	1032.21	12.7943	0.000667534	up
hsa_circ_0135363	3.09797	2.7675	4.34322	32.63	33.6389	37.2939	12.7715	0.00289333	up
hsa_circ_0048899	678.522	549.694	540.908	5515.48	6681.02	5986.96	12.749	0.000709868	up
hsa-circRNA9645-14	6.51675	11.5249	8.13779	69.8236	87.5974	109.02	12.7392	0.00340876	up
hsa_circ_0115030	3.52317	5.15931	4.85146	49.5958	59.3368	32.4513	12.7078	0.00546814	up
hsa_circ_0042372	147.039	137.687	156.213	1392.37	1502.54	1635.74	12.7043	0.000882317	up
hsa_circ_0019071	9.29789	14.721	12.9637	109.281	137.582	126.971	12.68	0.00247798	up
hsa_circ_0137163	2.44544	2.18639	3.98558	22.6661	29.9365	33.7072	12.67	0.00521298	up
hsa_circ_0060858	18.9555	8.21464	11.3792	141.008	135.151	99.7851	12.6697	0.0067886	up
hsa_circ_0102409	11.5699	10.5277	10.3991	108.944	115.424	107.844	12.6594	0.000614336	up
hsa_circ_0024579	154.669	116.381	149.906	1398.88	1367.73	1504.88	12.6452	0.00140688	up
hsa_circ_0100869	2.48784	2.4731	3.69654	19.1537	31.4178	40.2897	12.6412	0.0057483	up
hsa_circ_0137166	2.88366	2.72166	3.85981	35.2206	25.7589	35.4013	12.6183	0.00347889	up
hsa_circ_0139151	2.3915	2.37222	3.63464	32.8048	19.1628	34.7632	12.6167	0.00705099	up
hsa_circ_0121526	2.60207	2.34686	3.5532	31.4308	26.6238	27.3396	12.595	0.00327201	up
hsa_circ_0137676	10.6526	9.65568	3.81061	71.1895	71.8845	80.6018	12.587	0.00737076	up
hsa_circ_0080498	128.528	114.116	96.1877	1060.67	1204.86	1160.73	12.5833	0.000568764	up
hsa_circ_0134910	27.4207	14.2781	12.9826	171.309	182.499	170.937	12.5831	0.00382727	up
hsa_circ_0116332	200.343	174.781	165.723	1925.04	1775.58	1780.63	12.5729	0.000826715	up
hsa_circ_0036580	26.3715	17.8785	14.2017	174.988	201.078	199.054	12.5617	0.00188699	up
hsa_circ_0104380	6.82888	8.85827	3.93851	35.5741	74.0327	94.5989	12.5604	0.00984173	up
hsa_circ_0034173	7.04765	2.6641	3.5983	40.804	41.8388	41.3286	12.5549	0.00697776	up
hsa_circ_0126199	2.74208	2.59675	3.93696	33.7209	25.9582	33.3208	12.5393	0.00380089	up
hsa_circ_0137518	796.082	544.775	630.104	6107.07	6781.81	6859.49	12.5361	0.00124444	up
hsa_circ_0115886	2.77392	4.96991	3.54983	37.5864	38.258	35.2505	12.5206	0.00317065	up
hsa_circ_0095433	21.1359	31.5753	13.152	174.945	218.316	237.196	12.5058	0.00450765	up
hsa_circ_0100479	32.6539	34.5049	33.8068	356.237	295.69	368.269	12.4502	0.00119578	up
hsa_circ_0002782	110.078	121.154	77.6857	732.249	1283.27	1122.55	12.449	0.00238095	up
hsa-circRNA11014-14	4.69208	3.50645	4.37567	47.1386	44.271	35.094	12.4457	0.00240787	up
hsa_circ_0133326	18.8664	13.3974	22.1559	170.931	198.626	166.913	12.4237	0.00326841	up
hsa_circ_0042375	11.2441	8.17973	10.076	97.2081	104.802	91.7137	12.4085	0.00146623	up
hsa_circ_0028111	1622.07	1506.46	1571.96	14531	16107.3	16539.3	12.4067	0.000613263	up
hsa_circ_0139541	38.0794	30.5823	30.2403	457.179	227.475	340.238	12.3942	0.00527837	up
hsa_circ_0134683	9.8562	19.1514	13.5453	146.466	112.449	155.52	12.3821	0.0049913	up
hsa_circ_0023827	37.707	34.4561	45.171	408.912	405.095	353.398	12.3643	0.00201827	up
hsa_circ_0073577	4.11083	4.20066	4.04394	37.3194	43.2067	43.0576	12.3508	0.000568764	up
hsa_circ_0057331	8.49779	6.16941	3.76757	46.6976	68.6763	61.1658	12.3462	0.00387401	up
hsa_circ_0084778	22.9171	22.3848	9.99477	163.011	212.305	146.557	12.3301	0.00593297	up
hsa_circ_0073402	36.1284	16.6858	23.6311	233.196	208.803	286.94	12.2949	0.00506513	up
hsa_circ_0115460	110.139	107.629	107.537	1007.95	1163.02	1058.39	12.2635	0.000625747	up
hsa-circRNA6625-2	3.0824	3.49775	3.4901	43.9603	28.0011	29.4476	12.2215	0.0036307	up
hsa_circ_0060897	351.386	259.759	235.123	2677.84	2910.55	2650.66	12.2186	0.00113851	up
hsa_circ_0127420	2.9583	2.75108	4.08585	22.3577	37.1037	38.4746	12.2067	0.00416952	up
hsa_circ_0130056	15.541	15.8724	9.96201	130.252	116.889	154.797	12.2035	0.00174269	up
hsa_circ_0134681	33.1543	32.747	20.6933	272.796	254.146	310.228	12.1961	0.00157271	up
hsa_circ_0123088	57.0478	46.7504	48.2885	355.851	575.715	595.17	12.1512	0.00181145	up
hsa-circRNA6293-5	29.4527	26.6452	29.0708	268.259	304.299	263.541	12.1349	0.000916762	up
hsa_circ_0042374	64.1518	63.1425	41.1409	534.169	509.988	569.478	12.0829	0.00131937	up
hsa-circRNA106-4	14.5946	11.1067	12.0252	107.483	146.853	114.777	12.0764	0.00132595	up
hsa_circ_0107872	21.6242	21.5169	17.0591	205.15	180.955	198.574	12.0734	0.00087833	up
hsa_circ_0130789	15.3235	13.3011	8.36753	127.062	96.419	128.468	12.0479	0.00292659	up
hsa_circ_0079556	5.84176	5.78851	3.67093	40.4258	40.8623	69.324	12.0465	0.00327669	up
hsa_circ_0115459	145.156	148.399	114.045	1321.23	1210.61	1413.78	12.0376	0.000808357	up
hsa-circRNA8714-4	9.94843	8.27841	8.73658	93.2232	91.853	77.0541	12.0224	0.00132176	up
hsa_circ_0118335	18.4052	23.3963	11.9848	183.188	165.168	155.004	11.9863	0.00303944	up
hsa_circ_0122790	2.64795	2.62717	3.89463	22.1676	25.9278	42.5379	11.9582	0.00549513	up
hsa-circRNA6082-1	319.671	253.423	321.801	2633.46	2872.29	3108.31	11.9559	0.0012743	up
hsa_circ_0099513	17.5345	10.2622	13.5358	110.704	164.148	120.748	11.9514	0.00320871	up
hsa_circ_0126496	2.72595	2.64248	3.60631	26.5059	27.8456	31.6041	11.9385	0.0020797	up
hsa_circ_0048871	856.5	1036.66	742.182	6592.09	10695.2	8353.53	11.9198	0.00172612	up
hsa_circ_0139152	7.00188	3.12199	4.90557	41.3452	43.8368	52.8445	11.9173	0.00535811	up
hsa_circ_0136228	2.42223	2.28351	3.83952	17.3594	30.9274	35.2698	11.9105	0.00719659	up
hsa_circ_0042380	108.656	128.029	100.312	1022.43	1120.54	1082.03	11.8958	0.000670239	up
hsa_circ_0048891	448.998	381.706	307.16	2777.91	4659.36	3595.17	11.8762	0.00184542	up
hsa_circ_0115349	9.58481	12.3316	8.38599	109.528	74.95	106.674	11.8741	0.00272315	up
hsa_circ_0075797	2.59731	3.73475	4.03279	20.6967	35.7846	46.5269	11.8624	0.00663358	up
hsa_circ_0060873	38.5419	45.9027	28.5275	354.518	366.688	341.713	11.8592	0.00137601	up
hsa-circRNA14065	12.2848	10.5584	5.00583	51.243	99.7711	111.573	11.8519	0.00929036	up
hsa-circRNA9290-1	789.306	851.077	591.194	7298.77	6634.75	7142.33	11.8175	0.00109208	up
hsa_circ_0115451	439.822	297.475	222.385	2820.04	3180.88	2804.17	11.7885	0.00255056	up
hsa-circRNA4990-4	686.756	636.302	546.044	6125.88	5451.77	6168.77	11.7834	0.000792486	up
hsa_circ_0057084	15.6733	19.0525	9.41632	169.435	117.552	121.862	11.7825	0.00504339	up
hsa_circ_0066881	2.45424	2.19056	4.07846	26.6844	32.7382	21.6555	11.7807	0.00705679	up
hsa_circ_0126156	4.21348	4.95825	3.70325	35.6699	36.3899	51.2878	11.7702	0.00137893	up
hsa-circRNA1967-7	405.625	377.571	274.785	3046.5	3614.7	3283.64	11.7645	0.00091727	up
hsa_circ_0004662	492.317	488.075	474.779	4614.66	4207.65	5044.35	11.7613	0.000809725	up
hsa_circ_0080829	10.8456	15.6668	8.01679	95.7911	98.5838	123.801	11.76	0.00283786	up
hsa_circ_0107871	19.5491	19.5374	12.7688	136.859	147.693	207.052	11.7595	0.00190391	up
hsa_circ_0137021	3.00903	5.25633	3.72501	28.1097	44.9507	39.664	11.7251	0.00375093	up
hsa_circ_0134908	61.0259	32.0969	40.5098	443.74	391.61	386.819	11.709	0.00367555	up
hsa-circRNA14733-2	12.6097	22.4932	9.99661	110.529	165.97	130.565	11.6979	0.0053204	up
hsa_circ_0048888	1005.73	891.495	805.333	8101.31	9865.05	7570.66	11.6665	0.00103821	up
hsa_circ_0123089	25.9961	12.2963	11.0892	150.481	130.203	151.533	11.6648	0.00593609	up
hsa-circRNA3279-8	33.0184	31.9997	27.1464	280.358	300.042	285.449	11.6628	0.000542798	up
hsa_circ_0080821	9.51786	12.7147	9.6189	82.4145	109.165	108.18	11.6579	0.00127449	up
hsa-circRNA14735	21.3381	14.3981	18.5712	204.128	140.534	165.743	11.645	0.00342027	up
hsa_circ_0048907	2858.3	2235.88	2250.25	21991.8	24929.2	21801.2	11.6347	0.00091727	up
hsa_circ_0113446	18.8945	19.0256	13.9569	168.038	123.524	200.008	11.6176	0.00240678	up
hsa_circ_0077214	153.884	147.246	142.919	1400.61	1079.42	1767.69	11.6073	0.00209396	up
hsa-circRNA7742	18.0995	19.8892	11.6029	158.956	157.4	137.445	11.5981	0.00211609	up
hsa_circ_0135147	48.2782	30.2655	23.3323	231.547	384.206	314.496	11.5857	0.0041137	up
hsa_circ_0006045	129.22	135.503	139.152	1119.94	1291.84	1379.38	11.5782	0.000798016	up
hsa_circ_0091580	5.69382	2.66353	4.22318	33.7889	41.3635	37.5275	11.5775	0.00492113	up
hsa_circ_0110548	4.21184	2.50308	3.6444	27.2676	22.874	50.3675	11.5715	0.0076507	up
hsa_circ_0115720	44.9957	36.4859	38.1295	380.227	291.968	460.052	11.5632	0.00213781	up
hsa_circ_0140726	79.3354	68.9599	64.6504	701.914	700.129	583.976	11.5418	0.00117144	up
hsa_circ_0056158	74.0221	56.6957	36.8541	509.968	443.518	552.862	11.5281	0.00294535	up
hsa_circ_0031939	21.3021	13.4446	12.8169	162.56	114.226	159.285	11.5151	0.00348289	up
hsa_circ_0023819	12.5257	12.3889	9.31091	97.4221	120.252	99.1538	11.5065	0.000919032	up
hsa_circ_0075842	2.70422	2.54346	3.53731	26.1033	23.4192	31.9235	11.4978	0.0027761	up
hsa_circ_0108570	2.40431	2.25072	3.64016	20.9995	28.7865	26.0007	11.4776	0.0040027	up
hsa-circRNA840-9	118.039	128.742	131.062	1108.14	1225.27	1161.51	11.4484	0.000907497	up
hsa-circRNA7000-9	6.52279	2.82538	3.64467	30.727	50.6417	34.1759	11.4479	0.00719631	up
hsa_circ_0115450	178.065	145.399	100.359	1180.8	1385.56	1247.28	11.4172	0.00169518	up
hsa_circ_0122635	10.5025	5.94582	3.69576	54.599	75.7461	43.713	11.4073	0.00978882	up
hsa_circ_0122469	8.24003	9.16238	4.21551	66.2801	59.7948	62.8803	11.4058	0.00426913	up
hsa-circRNA466-2	3.14368	2.26156	3.66678	24.932	23.6974	34.4843	11.3986	0.00397409	up
hsa_circ_0140169	463.47	343.741	357.279	3649.63	3694.29	3293.19	11.3915	0.00127772	up
hsa_circ_0051324	224.726	199.832	194.952	2108.33	1884.74	1711.96	11.3766	0.00129214	up
hsa_circ_0133104	8.21557	7.11565	14.7976	63.2062	101.024	105.181	11.3735	0.00883336	up
hsa_circ_0089572	41.3499	24.4707	47.5408	290.755	372.228	344.999	11.3725	0.00533308	up
hsa-circRNA9089-4	2.81235	3.97627	4.0007	31.9244	24.4558	44.4645	11.3714	0.00501106	up
hsa_circ_0132994	168.931	117.67	135.534	1415.13	1214.7	1215.73	11.37	0.00191055	up
hsa-circRNA11940-27	494.351	482.158	479.329	3959.99	5033.51	4440.44	11.3652	0.000687826	up
hsa_circ_0118355	36.0424	46.7355	24.8585	285.469	382.321	296.015	11.3498	0.00273273	up
hsa_circ_0117634	2.68601	4.13599	4.3506	33.816	32.8793	33.535	11.3493	0.00366537	up
hsa_circ_0048877	350.287	331.731	330.224	2733.71	3722.37	2886.46	11.3199	0.00105633	up
hsa_circ_0072381	5.37058	2.2769	4.23806	31.8744	35.2901	35.0767	11.2996	0.00696511	up
hsa_circ_0094967	16.3138	25.0172	8.87554	111.844	136.074	181.183	11.299	0.00815733	up
hsa_circ_0133336	25.1514	25.4238	22.1687	196.968	253.934	214.814	11.2827	0.000663584	up
hsa_circ_0048886	373.147	389.584	232.757	2569.19	3671.37	2710.46	11.271	0.00238218	up
hsa_circ_0025319	47.8237	49.8418	49.6305	449.287	430.051	461.646	11.2631	0.000831828	up
hsa_circ_0093132	39.9807	40.1561	21.5589	265.345	314.132	312.565	11.2567	0.00258402	up
hsa_circ_0138617	2.59806	2.35325	4.3187	25.911	19.8342	38.6438	11.2539	0.00919567	up
hsa-circRNA10236-1	2.34936	2.28543	3.61933	34.0744	17.9778	23.8108	11.246	0.00888432	up
hsa-circRNA10861-1	5.0024	6.02522	3.65335	43.3583	45.0663	42.2604	11.2427	0.00153153	up
hsa_circ_0086390	24.6416	12.5267	9.17476	118.703	133.18	133.883	11.2299	0.00642184	up
hsa_circ_0121768	45.5294	44.1387	41.5761	336.25	384.996	481.037	11.2197	0.000864335	up
hsa_circ_0086385	3.74364	3.3317	4.05517	34.8144	35.6055	30.1331	11.1854	0.00168426	up
hsa_circ_0048894	308.445	286.899	255.745	2435.65	2933.82	2336.03	11.1808	0.000877105	up
hsa_circ_0060869	35.8234	34.8907	34.6723	304.052	331.209	317.405	11.1807	0.000613263	up
hsa_circ_0066704	4.96745	12.4785	8.32748	72.8365	78.2052	66.5612	11.1652	0.00863823	up
hsa_circ_0099237	30.2141	25.8666	20.114	213.675	258.022	209.426	11.1652	0.00122089	up
hsa_circ_0115444	106.55	90.0919	87.2989	985.287	868.992	718.605	11.1637	0.00191055	up
hsa-circRNA3283-2	2.93668	2.57183	3.80942	26.9551	35.6425	21.9654	11.16	0.00466439	up
hsa_circ_0060874	30.9409	43.5496	20.7283	306.053	267.877	247.847	11.1296	0.00422385	up
hsa_circ_0121765	40.0537	31.775	30.4013	229.262	320.329	383.275	11.1295	0.00167681	up
hsa-circRNA14596-6	23.7331	18.2431	23.2318	164.761	206.243	214.839	11.1208	0.00146431	up
hsa_circ_0077769	52.3022	47.1507	31.7436	374.761	296.131	505.613	11.0747	0.0033485	up
hsa-circRNA10236-2	2.82077	2.7177	3.97866	39.003	18.3857	30.3051	11.0526	0.00947993	up
hsa_circ_0139565	3.14934	3.18021	4.20339	27.2425	30.3347	36.1813	11.0408	0.00226178	up
hsa_circ_0112066	11.3397	8.65992	4.35634	80.5285	53.8703	69.785	11.0274	0.00817636	up
hsa_circ_0032519	245.859	222.607	162.79	1832.55	1688.31	2036.98	11.0259	0.00120649	up
hsa_circ_0096534	40.3853	31.3615	24.1421	268.835	290.207	275.85	11.0076	0.00138694	up
hsa_circ_0021522	10.5068	8.37892	3.61779	57.5867	76.1671	50.9201	10.9941	0.00979322	up
hsa_circ_0041058	13.6697	15.0862	12.7181	102.264	126.316	142.35	10.9933	0.000791726	up
hsa-circRNA7452-13	5.6748	3.40757	3.86084	25.7824	38.9336	51.8754	10.9743	0.00464121	up
hsa_circ_0031937	2.5872	4.48298	3.63387	26.7468	28.8373	38.0923	10.9724	0.00384843	up
hsa_circ_0042373	456.476	349.109	423.886	4027	3511.47	3328.33	10.9704	0.0019494	up
hsa-circRNA14974-1	609.245	557.616	488.556	5193.69	4780.88	4612.68	10.9354	0.00092109	up
hsa-circRNA13721-15	344.87	468.443	321.318	2643.87	3819.26	3545.74	10.9335	0.00169219	up
hsa_circ_0019217	161.943	122.149	97.3235	1101.99	1198.61	1003.64	10.9275	0.00174708	up
hsa_circ_0130057	37.2064	46.5129	40.6265	374.571	327.847	393.97	10.925	0.00136561	up
hsa-circRNA7923-4	447.336	369.317	392.868	3671.59	3448.01	3515.74	10.9124	0.000977384	up
hsa_circ_0131722	2.39353	2.32151	3.54288	17.5542	23.7907	32.3177	10.9116	0.00528493	up
hsa_circ_0070621	406.598	315.761	371.105	3277.21	2998.43	3321.79	10.909	0.00131406	up
hsa_circ_0077213	740.071	649.639	539.576	6295.61	5026.31	5587.32	10.8901	0.0014285	up
hsa_circ_0085176	5.48541	2.23	3.7071	26.3424	35.1454	33.1558	10.8654	0.00728199	up
hsa_circ_0040846	397.901	376.669	358.638	3485.2	3099.76	3363.27	10.8603	0.000846927	up
hsa_circ_0023818	29.5325	29.6406	15.4782	179.823	238.344	212.598	10.8418	0.00320265	up
hsa_circ_0070520	115.642	107.728	64.4894	663.049	891.699	901.955	10.7946	0.00231171	up
hsa_circ_0080499	236.904	167.905	175.468	1549.09	1741.95	1714.87	10.7904	0.00112466	up
hsa_circ_0114229	19.1877	32.5554	24.5578	205.725	233.206	211.969	10.79	0.00290566	up
hsa_circ_0073381	3.01806	2.93799	4.65227	33.648	29.8334	27.1655	10.7798	0.00492113	up
hsa-circRNA11231-13	145.701	84.6762	148.324	1037.22	1127.47	1034.1	10.7788	0.00449519	up
hsa_circ_0089562	51.7913	53.4225	37.2435	493.661	399.944	344.542	10.7749	0.0026421	up
hsa_circ_0106119	118.537	78.5394	105.74	1085.48	833.295	718.308	10.7742	0.00450967	up
hsa-circRNA4585-7	12.5767	6.00375	4.82672	67.8136	65.486	54.1654	10.7742	0.00795813	up
hsa-circRNA3279-15	24.0867	27.4965	13.4299	161.506	205.43	176.303	10.7612	0.00344139	up
hsa_circ_0024390	206.117	176.842	200.782	1537.37	1746.53	1789.91	10.7561	0.000862956	up
hsa_circ_0121633	308.643	184.018	197.526	1800.52	2029.82	2004.79	10.7365	0.00211764	up
hsa-circRNA3279-17	301.529	276.461	256.545	2331.23	2364.74	2529.72	10.731	0.000537474	up
hsa_circ_0025320	184.43	161.932	141.925	1277.52	1408.21	1532.3	10.7214	0.000568764	up
hsa_circ_0048868	1761.23	1572.96	1389.14	11876	14745.9	14273	10.7166	0.000568764	up
hsa_circ_0048855	100.875	82.2038	86.0366	511.519	1076.94	839.35	10.7089	0.00373805	up
hsa-circRNA15174-19	15.4727	14.4034	5.87668	105.49	92.5424	86.8896	10.7067	0.00851782	up
hsa_circ_0060896	474.252	408.028	272.202	3548	2920.05	3281.54	10.6943	0.00233495	up
hsa_circ_0060898	404.011	298.281	236.058	2492.13	2637.63	2783.15	10.6814	0.00153443	up
hsa-circRNA9834-41	7.43011	9.99072	5.6188	58.8569	65.3393	69.4629	10.6667	0.00193855	up
hsa_circ_0115032	26.0283	14.8978	9.76415	129.405	132.372	141.499	10.6652	0.00618508	up
hsa_circ_0086384	29.7554	34.7935	22.2394	201.159	324.109	225.65	10.6584	0.00251824	up
hsa_circ_0023838	40.6223	40.5957	31.0237	342.122	288.055	331.497	10.6561	0.00114967	up
hsa_circ_0094360	30.8729	60.1229	25.2633	299.936	274.085	363.415	10.6481	0.00667246	up
hsa-circRNA15190-11	14.57	17.6197	7.58611	119.05	86.2737	120.314	10.6337	0.00648627	up
hsa_circ_0070522	154.031	136.877	89.2992	892.805	1197.71	1113.41	10.6217	0.0018304	up
hsa-circRNA7452-1	81.6678	77.1493	73.3046	672.366	648.781	669.389	10.6208	0.000631797	up
hsa_circ_0060900	252.576	209.473	200.826	1827.57	1856.57	1979.25	10.6198	0.000634638	up
hsa_circ_0126908	6.76657	3.29453	4.47204	35.1082	35.2813	50.6627	10.6054	0.00526852	up
hsa_circ_0025322	1181.26	997.662	1199.17	8662.23	10704.5	9577.04	10.5992	0.00121364	up
hsa-circRNA13103-42	60.4458	55.5376	44.2644	480.272	426.559	454.024	10.5855	0.00102439	up
hsa_circ_0121766	90.3017	85.8481	101.547	727.358	841.344	804.341	10.5817	0.00118883	up
hsa_circ_0130535	98.9475	65.7413	64.4453	607.146	665.766	645.41	10.5651	0.00154207	up
hsa_circ_0102481	18.0749	36.5752	19.9438	134.113	229.289	266.363	10.5589	0.00792419	up
hsa_circ_0028109	413.702	383.264	337.476	3073.58	3411.61	3159.85	10.5475	0.000568764	up
hsa-circRNA6337	69.7726	65.5341	59.1001	549.682	540.811	562.504	10.545	0.000568764	up
hsa-circRNA15050	16.9938	7.76793	12.0659	72.4591	139.555	97.302	10.5391	0.00834416	up
hsa-circRNA5363-7	209.226	248.945	241.932	1783.09	2360.48	1847.05	10.5345	0.00157044	up
hsa_circ_0077209	387.295	386.008	288.792	3216.1	2803.96	2953.55	10.5344	0.00116217	up
hsa_circ_0137471	22.8671	28.8538	19.1973	124.484	314.241	199.041	10.5218	0.00676736	up
hsa_circ_0075501	19.5253	19.6646	8.51885	106.599	173.314	108.794	10.5207	0.00812823	up
hsa_circ_0132999	85.2756	62.3687	66.9986	553.805	604.587	653.987	10.5207	0.00104193	up
hsa-circRNA840-10	129.359	121.424	145.411	1104.15	1153.07	1100.35	10.5141	0.00132236	up
hsa_circ_0056651	2.68262	2.47674	4.04523	16.4996	32.9308	30.3356	10.5135	0.00752608	up
hsa_circ_0071541	1379.85	1245.3	1115.61	9262.89	11622.2	10919.4	10.5133	0.000568764	up
hsa-circRNA5494-6	2.79456	2.62803	3.86417	27.68	20.2262	31.0184	10.5059	0.00481703	up
hsa_circ_0127597	2.46239	3.93677	3.51897	18.2583	33.8249	33.6922	10.4947	0.00577544	up
hsa_circ_0126739	2.7168	2.49019	4.09231	26.1702	27.491	23.4731	10.4947	0.00463826	up
hsa_circ_0121469	16.6808	12.6304	8.6044	64.5601	97.3966	175.597	10.4896	0.00947774	up
hsa_circ_0084552	18.1358	35.7939	25.9044	207.579	194.401	253.554	10.4861	0.00518982	up
hsa_circ_0050583	620.963	490.483	615.867	4936.96	4355.09	5286.46	10.4717	0.00171203	up
hsa-circRNA15174-11	36.4187	35.2001	45.8322	360.326	272.235	362.092	10.4634	0.00309609	up
hsa-circRNA9053	20.6193	40.0854	27.76	250.329	208.742	262.856	10.4293	0.00511621	up
hsa-circRNA5847-5	18.6891	22.8249	19.6457	132.036	190.619	198.634	10.4172	0.00152294	up
hsa_circ_0103095	215.415	230.279	178.975	1441.18	1610.63	2274.09	10.4056	0.00152775	up
hsa_circ_0127587	67.0905	65.0632	53.2132	527.85	455.892	573.869	10.4054	0.00100931	up
hsa_circ_0060878	118.525	128.794	80.0416	878.404	839.674	984.242	10.4031	0.00154015	up
hsa_circ_0051416	143.698	143.991	93.8124	797.668	1187.47	1217.32	10.4024	0.00201138	up
hsa_circ_0124880	105.552	93.6786	68.1551	668.913	867.886	686.421	10.3866	0.00148226	up
hsa_circ_0116569	21.7163	15.5438	13.3995	113.039	165.413	142.355	10.37	0.00191833	up
hsa_circ_0115722	92.1527	68.3691	74.8382	690.457	524.679	762.36	10.3538	0.0023503	up
hsa_circ_0065614	110.348	108.759	124.153	763.907	1049.62	1081.26	10.3309	0.00148402	up
hsa_circ_0028099	232.841	210.226	224.348	1707.86	1945.09	1919.18	10.3232	0.000663725	up
hsa_circ_0133345	40.0166	34.6912	17.4844	250.541	269.804	208.385	10.322	0.00572779	up
hsa-circRNA10051-9	31.2005	21.5599	20.3001	139.203	189.158	299.532	10.3055	0.00487121	up
hsa_circ_0028118	822.818	846.924	705.837	6169.14	6973.05	6589.62	10.298	0.000537474	up
hsa-circRNA14084-6	47.155	58.2545	36.0734	333.11	393.109	435.434	10.2927	0.00147911	up
hsa_circ_0112071	25.912	18.635	17.8712	156.828	162.856	194.2	10.2888	0.00129049	up
hsa_circ_0139125	2.52741	2.47278	3.51662	25.0543	22.1252	22.7846	10.2883	0.00330097	up
hsa_circ_0124388	36.5192	19.1442	24.2919	167.506	215.853	269.607	10.2841	0.00445623	up
hsa_circ_0098299	60.0959	64.6728	63.0969	473.274	541.31	547.696	10.2733	0.000687826	up
hsa-circRNA9807-51	5.15248	5.40942	6.30123	48.8926	47.6947	42.9101	10.2588	0.00191389	up
hsa_circ_0072392	206.74	113.722	83.8778	675.02	1191.87	1394.8	10.2545	0.00929212	up
hsa-circRNA958-4	51.3066	40.6489	36.362	316.098	363.774	373.117	10.2347	0.000808357	up
hsa-circRNA12807-4	27.3985	27.2129	20.451	175.831	250.955	195.489	10.2345	0.00128308	up
hsa_circ_0004650	11.5558	14.2037	11.8754	147.056	92.3407	81.0857	10.2296	0.00582836	up
hsa-circRNA4696-9	3.9295	5.86775	3.96647	41.9153	34.9578	35.2463	10.2284	0.00271935	up
hsa_circ_0135144	48.6398	32.4104	24.5999	205.099	287.983	370.658	10.2274	0.00451735	up
hsa_circ_0115027	45.5802	42.7971	30.1339	347.799	296.19	321.937	10.2253	0.00158123	up
hsa-circRNA3279-16	38.5344	27.2442	20.2247	255.473	217.968	214.527	10.2158	0.00321614	up
hsa_circ_0102269	2.35818	2.25314	3.66093	22.7914	26.3291	18.2112	10.2109	0.00599597	up
hsa_circ_0048882	2011.29	1807.22	1770.59	14248.5	17216.9	14686	10.1986	0.000722794	up
hsa_circ_0060885	74.6928	85.2142	75.9684	590.313	699.061	654.937	10.1936	0.000717353	up
hsa_circ_0068513	19.1755	22.413	8.61133	133.921	129.217	119.438	10.1906	0.00757138	up
hsa_circ_0004770	428.363	299.976	273.414	2435.73	2610.43	3083.53	10.1881	0.00152775	up
hsa_circ_0060872	36.4211	29.5266	22.6625	250.987	232.273	231.199	10.1575	0.00157271	up
hsa_circ_0124989	95.9868	80.1095	68.0197	646.974	661.701	674.113	10.1497	0.000801339	up
hsa-circRNA10861-13	10.1309	4.52217	3.61409	42.3102	42.2641	51.0814	10.1492	0.00893985	up
hsa_circ_0070521	95.8088	89.2387	51.8156	561.512	686.856	631.159	10.1356	0.00247762	up
hsa_circ_0113445	20.165	22.2383	17.3316	136.192	165.411	188.805	10.122	0.000843065	up
hsa_circ_0070517	69.8775	60.2362	44.2964	428.184	494.563	481.672	10.1208	0.0011242	up
hsa-circRNA4585-13	16.2308	7.74211	15.1434	89.8806	97.622	118.135	10.1063	0.00732038	up
hsa_circ_0060853	25.9781	14.4126	9.83199	135.156	127.058	116.759	10.106	0.00718846	up
hsa_circ_0060876	102.494	102.821	76.5577	744.317	790.758	745.51	10.101	0.0007916	up
hsa_circ_0115455	326.257	286.231	222.193	2181.69	2336.3	2206.22	10.0892	0.000919067	up
hsa_circ_0002935	38.6507	26.2623	33.4665	199.27	273.353	337.671	10.0861	0.0029443	up
hsa_circ_0021371	13.4269	11.4202	7.01233	86.4654	73.6611	91.3143	10.0826	0.00307592	up
hsa-circRNA466-4	10.0095	8.07927	4.39325	42.859	49.0209	91.1085	10.0694	0.00922027	up
hsa_circ_0066885	16.274	13.1479	8.44804	111.1	88.7421	98.6957	10.0665	0.00341452	up
hsa_circ_0099190	79.2798	82.3734	64.0977	601.431	610.382	609.593	10.0434	0.000632396	up
hsa_circ_0107870	21.5178	15.0307	26.6846	139.539	184.956	177.707	10.0233	0.00468219	up
hsa_circ_0070519	125.601	120.167	101.973	919.465	994.001	894.52	10.0219	0.000632396	up
hsa_circ_0050584	593.845	432.506	590.676	4952.08	3783.75	4284.33	10.0091	0.00317533	up
hsa_circ_0130281	5.54777	4.51451	4.31951	49.0312	24.965	46.6539	10.001	0.00653348	up
hsa_circ_0077802	270.525	219.874	178.063	1629.02	1811.36	1892.79	9.99757	0.000961934	up
hsa_circ_0115457	334.176	299.219	306.767	2677.07	2161.89	2769.53	9.96728	0.00138565	up
hsa_circ_0060899	514.44	382.058	381.144	3354.53	3594.52	3243.93	9.9647	0.00117767	up
hsa_circ_0094966	15.0917	27.696	19.1708	126.787	163.99	200.806	9.95768	0.00469934	up
hsa_circ_0016420	2.99255	4.15358	4.42444	42.1451	23.6687	28.7172	9.95669	0.00763963	up
hsa_circ_0130788	22.3771	17.0776	19.0953	162.208	134.109	173.76	9.93824	0.00171551	up
hsa_circ_0042378	28.1903	19.9086	28.6421	196.405	238.622	177.252	9.93047	0.00321716	up
hsa_circ_0137744	13.0916	11.0636	13.7689	103.809	108.205	91.6497	9.92681	0.00182165	up
hsa_circ_0115441	21.3983	22.5523	17.1057	167.856	157.094	161.36	9.9219	0.000890697	up
hsa_circ_0006245	25.6301	45.4715	19.3708	270.254	173.944	246.37	9.90631	0.00870798	up
hsa_circ_0086192	47.6073	41.422	54.2075	354.958	436.771	351.887	9.88911	0.00206576	up
hsa-circRNA10283-5	3.04321	5.57049	4.30048	26.5949	36.8325	37.8948	9.88151	0.00464369	up
hsa_circ_0095396	167.873	139.104	150.471	1107.53	1344.72	1200.77	9.88002	0.000890697	up
hsa_circ_0042379	199.863	159.432	131.211	1176.5	1293.65	1387.05	9.85392	0.00101454	up
hsa-circRNA7452-8	78.2536	83.4511	83.1138	596.282	666.782	688.673	9.851	0.000749543	up
hsa_circ_0060901	625.48	613.435	564.812	4810.43	4699.11	4803.45	9.82855	0.000614336	up
hsa-circRNA14820-13	311.789	296.724	211.346	2250.4	1896.47	2279.64	9.80595	0.00153285	up
hsa_circ_0096118	349.339	290.061	269.953	2529.12	2139.39	2514.45	9.80454	0.00119578	up
hsa_circ_0089563	240.973	235.696	175.167	1874.23	1698.47	1549.53	9.79422	0.00151129	up
hsa_circ_0060902	465.379	371.268	293.269	2782.65	2807.1	3206.96	9.78476	0.00127317	up
hsa-circRNA7603-4	7.05787	17.7204	11.0727	77.437	86.5877	102.043	9.78281	0.00917487	up
hsa-circRNA3479-3	14.7713	8.77201	6.74952	72.902	83.7658	70.4786	9.76994	0.0044866	up
hsa_circ_0134260	6.27555	10.7026	9.93257	74.9998	59.2894	73.8096	9.769	0.00538754	up
hsa_circ_0087238	28.762	45.4973	38.0774	176.493	370.152	374.67	9.76403	0.0076222	up
hsa_circ_0130275	2.36139	5.79812	3.99896	31.2047	27.3811	31.4084	9.75675	0.00952881	up
hsa_circ_0115442	62.9662	70.6514	68.7804	600.797	517.193	481.643	9.75	0.00187118	up
hsa_circ_0070706	13.3328	11.3027	7.87685	90.5898	78.9107	81.0959	9.74509	0.00212023	up
hsa-circRNA1967-15	430.348	432.615	430.498	3170.42	3625.68	3400.37	9.7405	0.00064335	up
hsa_circ_0048875	728.912	653.017	558.268	4750.14	5369.22	5045.8	9.71784	0.000609408	up
hsa_circ_0086387	12.2665	14.4099	6.89896	71.5538	93.7054	88.0592	9.71709	0.00384391	up
hsa_circ_0127188	100.241	69.2136	73.9028	505.058	629.274	780.415	9.71414	0.00201827	up
hsa_circ_0070620	57.9058	38.9561	38.4328	319.43	324.576	404.158	9.7114	0.00178493	up
hsa_circ_0128226	7.18528	13.0721	8.36866	69.3487	88.9044	61.5338	9.70683	0.00510617	up
hsa_circ_0068480	51.6102	39.2079	31.3745	306.327	330.281	301.582	9.69311	0.00155574	up
hsa_circ_0137686	504.681	402.661	430.496	3158.09	3737.29	3558.89	9.69002	0.000843065	up
hsa_circ_0084547	2.713	5.47059	3.8641	22.5829	31.1033	39.1955	9.68941	0.00694544	up
hsa_circ_0123930	4.63963	3.48023	3.94711	31.3549	29.2767	33.2527	9.68194	0.00131937	up
hsa-circRNA6621-4	5.72757	5.83308	3.95457	37.8479	44.5654	37.4535	9.67659	0.00132411	up
hsa-circRNA5363-3	128.772	156.166	123.96	983.224	1034.9	1167.15	9.66492	0.000867526	up
hsa_circ_0138426	25.1563	14.6681	16.1356	136.519	122.898	168.15	9.64739	0.00328784	up
hsa_circ_0086196	2.38146	2.99202	3.70561	20.2165	21.0063	29.4133	9.64223	0.00431131	up
hsa_circ_0023826	41.8909	39.1261	29.1917	269.238	296.295	281.146	9.61278	0.000872667	up
hsa_circ_0135141	2.48818	2.43958	3.7268	17.1469	23.46	26.2424	9.59833	0.00465753	up
hsa-circRNA15976-1	28.0732	35.7395	22.2953	238.836	183.106	238.307	9.59317	0.00262681	up
hsa_circ_0022212	3.41668	4.71277	4.19324	33.2873	26.691	35.3295	9.58631	0.00269522	up
hsa_circ_0019255	21.2573	12.3494	10.5615	102.668	111.183	112.9	9.58586	0.00352883	up
hsa_circ_0116757	108.985	108.315	114.401	742.259	873.314	966.878	9.58088	0.00091727	up
hsa_circ_0134909	20.4358	26.2086	11.4652	117.912	148.679	162.56	9.5808	0.00506078	up
hsa_circ_0130611	20.6316	19.2688	17.1607	155.973	133.574	150.787	9.55592	0.000983399	up
hsa_circ_0126495	32.0106	19.8249	14.6448	177.158	110.896	217.443	9.55018	0.00923116	up
hsa_circ_0126439	10.781	9.65961	6.96423	55.4892	76.2873	78.5873	9.54351	0.00152775	up
hsa_circ_0078604	13.1619	13.9849	10.7619	98.7287	93.9351	97.7844	9.53729	0.000808357	up
hsa-circRNA840-8	289.433	326.009	286.782	1842.53	2645.43	2530.63	9.52367	0.00114498	up
hsa-circRNA14363-14	2.96181	2.73951	4.06261	23.3557	23.6506	27.1761	9.52058	0.00321716	up
hsa_circ_0080832	9.5525	18.3689	13.3557	87.4302	94.054	129.309	9.50899	0.00569241	up
hsa_circ_0075635	117.954	82.7748	66.9055	654.586	717.877	627.711	9.49371	0.00218706	up
hsa_circ_0043705	40.2329	32.969	22.9035	219.214	261.77	238.152	9.48167	0.00183778	up
hsa_circ_0048864	307.308	271.407	190.228	1996.16	2187.55	1633.36	9.47959	0.00243601	up
hsa_circ_0060304	26.6982	36.9593	29.4811	244.317	262.161	203.753	9.47313	0.00238633	up
hsa_circ_0119737	5.65497	2.34049	3.62964	25.7506	29.1219	28.6954	9.46834	0.00736301	up
hsa_circ_0137675	33.8975	30.5428	32.5402	260.885	241.021	239.827	9.46606	0.00112908	up
hsa-circRNA16206-2	56.4581	66.3875	48.7466	467.726	350.524	498.256	9.46243	0.00220405	up
hsa-circRNA15174-6	14.7227	13.4481	7.23914	76.6341	83.7934	99.7562	9.4612	0.00377486	up
hsa_circ_0009942	7.01758	7.36435	3.9199	37.5705	50.598	47.417	9.44727	0.00315775	up
hsa_circ_0113441	15.5382	14.2895	7.13167	83.0762	84.1012	100.684	9.44228	0.00483143	up
hsa_circ_0042371	157.237	147.006	136.117	1182.84	1071.72	1096.99	9.42621	0.000888911	up
hsa-circRNA5847-6	185.602	157.061	173.232	1748.64	834.311	1526.78	9.41981	0.00797302	up
hsa_circ_0127602	27.1703	15.1015	19.0084	177.318	127.902	151.572	9.41738	0.00497161	up
hsa_circ_0060871	48.9637	55.1765	42.9658	353.044	380.274	379.587	9.40508	0.000631797	up
hsa_circ_0060855	19.5465	16.3512	13.1906	150.605	124.428	98.551	9.39821	0.00351587	up
hsa-circRNA5363-4	139.814	134.863	118.622	915.348	1067.37	999.112	9.3865	0.000537474	up
hsa_circ_0084551	19.9068	33.8595	29.2585	213.323	190.506	210.837	9.37245	0.00431782	up
hsa_circ_0116334	103.42	82.9632	67.0134	498.056	695.598	720.28	9.36907	0.00160015	up
hsa_circ_0050967	75.0742	73.676	87.7011	563.063	621.074	600.783	9.36267	0.00138694	up
hsa_circ_0078607	6.8613	5.19056	4.08492	47.6032	36.0203	36.6675	9.35595	0.00328952	up
hsa-circRNA5147-1	14.1629	13.705	5.87958	74.271	67.6588	97.8712	9.34706	0.00819291	up
hsa_circ_0106024	2.48152	2.31854	3.7778	16.6538	26.7659	20.995	9.34431	0.00590831	up
hsa_circ_0077215	651.473	530.742	518.173	3979.53	3893.89	4974.05	9.34166	0.00106106	up
hsa_circ_0127065	70.0753	57.723	62.7168	372.351	534.065	543.427	9.31103	0.00140775	up
hsa-circRNA1967-12	90.007	84.9516	75.9285	598.521	673.884	612.204	9.30615	0.000568764	up
hsa_circ_0119103	37.9454	29.2767	28.8242	253.202	229.416	234.194	9.30272	0.0013042	up
hsa_circ_0125517	61.5033	39.1997	31.5604	346.168	280.224	332.811	9.29872	0.00389207	up
hsa_circ_0060888	32.7256	30.0695	22.9144	202.508	201.663	234.211	9.29791	0.000919032	up
hsa_circ_0130113	5.38727	3.48523	3.90693	35.1489	33.514	26.0535	9.2553	0.00345137	up
hsa_circ_0079895	24.8057	29.8882	16.4874	171.783	231.54	128.103	9.2439	0.00605466	up
hsa_circ_0067411	147.824	130.76	123.364	1000.43	859.759	1155.04	9.2424	0.00125113	up
hsa_circ_0004207	796.705	601.662	559.613	4983.07	4589.3	4880.01	9.23796	0.00131406	up
hsa_circ_0112069	6.34087	10.135	3.64963	47.1798	44.7906	46.1159	9.23405	0.00850774	up
hsa_circ_0002991	88.9047	76.4343	44.964	525.285	440.442	548.282	9.23147	0.00379622	up
hsa_circ_0060860	46.8011	59.0253	40.6551	379.463	397.856	307.79	9.22108	0.0021613	up
hsa_circ_0095397	9.78372	7.82977	5.74226	55.0079	59.6822	55.2202	9.20898	0.00170345	up
hsa_circ_0137679	76.8303	75.642	64.0992	534.372	547.187	520.128	9.18011	0.000625747	up
hsa_circ_0057330	18.2152	11.7578	19.2121	101.007	116.853	142.276	9.17904	0.00430491	up
hsa_circ_0102116	7.43312	11.7982	13.9236	97.5424	70.1131	72.7817	9.17543	0.00890912	up
hsa-circRNA11940-59	1820.22	1620.56	1634.24	9020.31	15204.7	14292.6	9.16791	0.0020587	up
hsa_circ_0070619	303.8	259.324	285.275	1816.55	2188.31	2293.06	9.15995	0.00088685	up
hsa_circ_0049172	95.3655	92.1884	73.9258	692.3	588.758	646.255	9.1578	0.00116519	up
hsa-circRNA11758-16	4.45057	3.78129	3.66947	41.7543	23.4734	25.5077	9.15441	0.00591487	up
hsa_circ_0115448	236.934	190.936	197.747	1418.96	1546.59	1635.89	9.12766	0.000749543	up
hsa_circ_0075632	14.7211	18.0079	15.3591	100.939	139.695	115.874	9.12752	0.00135419	up
hsa_circ_0124755	5.38296	7.1457	3.72589	47.789	30.6088	39.3112	9.12709	0.00589346	up
hsa_circ_0035614	3.86879	4.25077	3.9681	26.3196	32.3292	30.4593	9.09614	0.000758408	up
hsa-circRNA13103-20	485.977	361.024	398.651	2924.76	2977	3189.75	9.09554	0.00115061	up
hsa_circ_0076097	35.421	34.7627	29.9219	161.013	312.772	288.844	9.07815	0.00337617	up
hsa_circ_0025004	309.457	277.452	280.505	2082.31	2224.51	2049.02	9.07262	0.000749543	up
hsa_circ_0025002	133.534	134.385	138.87	980.715	957.007	1045.38	9.06974	0.000897165	up
hsa_circ_0112061	42.4325	19.7613	25.3294	219.689	185.62	204.502	9.06147	0.0062766	up
hsa_circ_0005021	4.60691	6.19603	3.6135	39.9052	38.1888	26.3471	9.03545	0.00506322	up
hsa_circ_0126741	2.4916	5.63203	3.4927	26.6498	31.7677	22.4592	9.02522	0.00905133	up
hsa-circRNA9266	11.1245	13.5412	9.72581	62.7912	94.9002	95.2452	9.0209	0.00183133	up
hsa_circ_0075841	8.16412	4.40068	3.74118	39.1163	35.3161	37.6067	9.01406	0.0054751	up
hsa_circ_0023984	5.1108	3.87996	4.66143	34.5292	32.2415	32.0724	9.01226	0.00168184	up
hsa_circ_0060890	117.386	118.687	78.1334	732.899	778.032	736.265	9.00757	0.00135419	up
hsa_circ_0007920	32.043	47.9501	32.5153	243.411	270.269	291.889	8.99737	0.00197859	up
hsa_circ_0034189	18.5752	34.8495	18.33	141.692	211.251	152.243	8.9949	0.00622414	up
hsa_circ_0029358	2628.99	2639.13	3245.39	16936.1	19187.9	26546.1	8.98758	0.00285966	up
hsa-circRNA3279-12	96.2449	73.4947	60.1736	501.209	598.268	543.812	8.98757	0.0014011	up
hsa_circ_0129635	53.2165	43.5868	40.0972	366.033	269.433	361.032	8.98535	0.00214922	up
hsa_circ_0080828	32.5034	30.1589	17.7476	152.375	193.183	225.238	8.97181	0.00312613	up
hsa_circ_0096079	20.8359	17.2776	11.4477	99.6386	126.306	124.777	8.97138	0.00223931	up
hsa_circ_0065239	11.8901	8.3023	10.0889	71.6933	58.5519	90.3444	8.96943	0.00324099	up
hsa-circRNA9703-11	197.925	149.1	93.479	712.877	1230.28	1184.51	8.93627	0.00586966	up
hsa-circRNA840-3	554.882	650.044	643.063	4479.16	3975.86	4891.13	8.92786	0.00163312	up
hsa_circ_0080826	48.9193	60.933	35.2443	367.672	313.465	341.25	8.91868	0.00262671	up
hsa-circRNA9222-3	3932.49	3349.94	3581.68	24220.6	25769.4	28222.3	8.9104	0.000774626	up
hsa_circ_0016418	12.7935	11.1068	4.66352	61.0781	64.4661	62.7638	8.90727	0.0092631	up
hsa_circ_0081948	144.363	111.431	68.3929	726.908	684.13	824.588	8.90557	0.00397392	up
hsa_circ_0006341	150.431	127.306	141.266	902.519	1106.72	1006.37	8.89632	0.000966188	up
hsa_circ_0115449	161.554	118.58	97.5991	784.643	912.782	965.318	8.88203	0.00158646	up
hsa_circ_0130058	50.8394	39.7535	36.8696	304.566	293.517	307.234	8.87254	0.00105812	up
hsa_circ_0098063	155.845	194.81	82.7245	1001.81	923.981	989.147	8.84012	0.00607237	up
hsa_circ_0115721	74.0367	77.6341	60.2465	450.882	468.066	595.482	8.8268	0.000961216	up
hsa_circ_0102121	16.4458	9.62676	7.678	74.1371	65.7422	90.3193	8.82049	0.00532807	up
hsa-circRNA7915-1	13.892	16.9188	12.563	81.6733	106.634	122.558	8.81517	0.00147455	up
hsa_circ_0113002	17.3391	21.3153	13.514	119.542	122.944	122.814	8.81436	0.00146586	up
hsa_circ_0017608	385.212	418.334	382.24	2730.64	2842.28	2867.48	8.8137	0.000646311	up
hsa_circ_0097200	442.368	496.941	323.976	2352.23	3661.44	2972.19	8.79839	0.00213678	up
hsa_circ_0060861	132.688	101.122	69.0296	616.324	818.721	658.557	8.7931	0.00316564	up
hsa_circ_0051417	476.291	441.556	354.171	2893.64	3176.38	2903.45	8.78903	0.000757144	up
hsa_circ_0019030	53.2835	41.1423	52.073	277.02	336.461	436.682	8.77485	0.0025012	up
hsa-circRNA9967	112.409	100.803	78.9046	616.084	728.611	709.814	8.77341	0.000791726	up
hsa-circRNA13044	9.81111	7.59356	4.77852	68.1281	35.6643	52.2126	8.77325	0.00971371	up
hsa_circ_0073401	85.1599	100.79	92.1073	778.95	575.793	626.108	8.76381	0.0026532	up
hsa_circ_0025009	75.9137	61.4579	52.2442	416.101	411.835	505.104	8.76308	0.00117038	up
hsa_circ_0014039	2.56893	2.35435	4.12675	17.6737	19.6169	25.4901	8.75454	0.00674422	up
hsa_circ_0046348	175.566	149.931	141.672	1069.48	1092.77	1129.02	8.75249	0.000625747	up
hsa_circ_0048887	1339.88	1074.29	1034.95	8094.81	8511.79	7643.05	8.74978	0.00104293	up
hsa-circRNA958-5	130.72	160.889	118.239	911.488	1060.23	909.035	8.7479	0.00120527	up
hsa_circ_0067118	80.7704	92.3454	51.6445	547.803	469.281	528.519	8.74333	0.00292128	up
hsa_circ_0107788	248.218	253.079	187.909	1530.96	1551.25	1737.03	8.71646	0.00079075	up
hsa-circRNA6322-1	30.398	30.0312	18.5718	205.738	152.663	188.305	8.71126	0.00335439	up
hsa_circ_0011173	234.148	188.266	134.515	933.693	1480.99	1488.58	8.69693	0.00324111	up
hsa_circ_0084777	324.219	280.932	324.82	2186.09	2161.36	2173.46	8.69673	0.0012168	up
hsa_circ_0131457	342.416	329.36	284.461	2132.21	2655.77	1960.47	8.68785	0.00132902	up
hsa_circ_0139146	3.30495	5.60689	4.15398	29.8012	27.8726	32.0335	8.68472	0.00362333	up
hsa-circRNA3835-5	39.8587	38.8588	30.8933	233.404	286.656	246.542	8.67685	0.00079075	up
hsa-circRNA14084-3	73.7527	53.5387	38.3696	293.455	428.116	415.259	8.67357	0.00339864	up
hsa_circ_0075887	49.2676	57.812	43.7728	277.395	395.611	390.649	8.66945	0.0013229	up
hsa_circ_0060895	243.22	202.542	168.841	1217.39	1594	1465.72	8.65353	0.00104193	up
hsa_circ_0073576	4.77893	3.8353	6.8277	29.6998	34.4983	41.7324	8.65116	0.00595364	up
hsa_circ_0025008	530.654	409.599	294.353	2479.94	2697.09	3243.64	8.62935	0.00232261	up
hsa_circ_0121769	62.0537	86.0879	61.3195	495.707	441.142	507.7	8.62783	0.00193171	up
hsa-circRNA6345-26	4.32408	3.40515	3.6371	20.4146	30.4529	29.116	8.61999	0.00162646	up
hsa-circRNA1881-10	2.6753	5.39972	3.81885	21.4942	26.5239	32.5805	8.60888	0.00675542	up
hsa_circ_0060866	42.8567	30.716	19.3558	187.037	223.903	204.762	8.60759	0.0044137	up
hsa_circ_0063698	293.026	366.417	216.419	1832.81	2200.99	1922.52	8.58378	0.00202643	up
hsa_circ_0073581	71.74	71.2678	54.6123	432.8	466.28	461.59	8.58254	0.000632396	up
hsa_circ_0115462	53.4419	39.8813	32.756	291.24	277.151	287.927	8.57636	0.00173687	up
hsa_circ_0132347	15.1172	13.8943	15.6662	93.7121	116.176	100.31	8.56767	0.0012096	up
hsa_circ_0104690	9.33615	10.9079	6.4876	75.8082	41.6172	69.3195	8.56021	0.00732334	up
hsa_circ_0111892	23.5681	19.8754	10.8514	121.473	100.257	138.111	8.5592	0.00576316	up
hsa_circ_0049060	431.419	551.97	339.068	2564.06	3190.7	3258.57	8.55292	0.00174305	up
hsa_circ_0121669	45.2279	39.0997	30.1698	236.853	324.456	228.752	8.54707	0.00214302	up
hsa_circ_0006774	707.259	799.105	784.112	5298.86	5904	4654.25	8.539	0.00172759	up
hsa_circ_0094208	30.162	24.428	13.0718	173.596	144.952	125.403	8.53095	0.00771119	up
hsa_circ_0056731	5.12827	4.35013	3.77507	29.6513	29.215	31.8227	8.52833	0.000798759	up
hsa_circ_0088286	58.5912	44.8041	62.2414	316.34	411.165	411.139	8.52794	0.00244598	up
hsa_circ_0074208	37.6209	21.9782	28.6682	117.057	273.545	241.909	8.52354	0.00989167	up
hsa_circ_0069026	14.092	17.1243	13.0867	130.51	96.6776	81.0384	8.49735	0.00460827	up
hsa_circ_0121623	20.0034	14.3948	12.6049	96.3423	125.712	96.8895	8.49326	0.00216993	up
hsa_circ_0122634	8.40929	8.32415	3.65831	46.4389	46.7422	38.0035	8.48292	0.00816628	up
hsa_circ_0046329	57.9656	50.3727	52.1626	362.731	353.417	382.2	8.47905	0.00080861	up
hsa_circ_0130599	2.50604	2.49135	3.70947	16.8194	21.2829	20.7894	8.47587	0.0041137	up
hsa-circRNA14157-119	53.3219	73.5148	39.9326	318.969	384.387	407.465	8.4567	0.00276883	up
hsa-circRNA6015-13	4.03993	6.71563	4.13548	33.973	24.9854	41.944	8.44051	0.0062347	up
hsa_circ_0133643	18.0726	16.5695	22.0847	84.2744	146.665	169.439	8.43477	0.00585862	up
hsa_circ_0024296	137.108	100.866	94.4588	561.749	938.838	780.57	8.42103	0.00262671	up
hsa-circRNA12421-47	2.58436	2.51211	3.48736	12.8627	22.652	24.365	8.40697	0.0062253	up
hsa_circ_0112068	8.62729	5.62548	4.06795	49.807	39.8576	31.0805	8.39771	0.00813464	up
hsa_circ_0046344	283.065	293.734	263.19	1950.23	1834.99	1910.65	8.39715	0.00079075	up
hsa_circ_0095912	570.343	543.26	499.793	3272.14	3583.99	4123.89	8.39572	0.000594253	up
hsa_circ_0016521	23.8453	31.082	14.6499	159.418	137.9	154.219	8.39523	0.00491512	up
hsa_circ_0034727	61.6868	58.3731	59.8361	428.271	412.377	380.236	8.39009	0.0011917	up
hsa_circ_0066477	9.04516	4.6432	3.54282	28.5184	42.2652	38.289	8.37659	0.00860148	up
hsa_circ_0098296	49.4295	57.4376	47.8395	289.685	378.904	383.184	8.37205	0.000960329	up
hsa-circRNA7480-2	217.892	190.454	187.639	1246.05	1353.39	1429.76	8.37191	0.000568764	up
hsa_circ_0127189	100.267	55.9255	60.1879	394.98	463.801	568.203	8.36076	0.00398124	up
hsa-circRNA9834-3	66.6666	74.9784	68.1119	423.981	483.059	512.224	8.35822	0.000727637	up
hsa_circ_0025003	251.789	184.875	144.895	1322.59	1045.46	1502.22	8.35667	0.00345097	up
hsa-circRNA5844-2	51.5264	50.1697	68.8349	361.291	386.69	390.189	8.34204	0.00278646	up
hsa-circRNA10625-5	46.7185	40.6711	38.5705	247.378	325.033	278.711	8.33691	0.00086394	up
hsa_circ_0031998	5.91384	6.29746	9.04177	49.6399	43.579	47.5762	8.33561	0.00476059	up
hsa_circ_0103737	8.20265	12.4187	6.02406	71.1529	59.217	44.3916	8.32801	0.00835492	up
hsa_circ_0111893	15.5081	27.6321	20.4031	116.504	141.436	161.371	8.32186	0.00453677	up
hsa_circ_0046347	193.929	159.238	165.613	1126.22	1188.87	1156.46	8.30938	0.000841812	up
hsa_circ_0007067	173.725	177.486	155.47	1026.9	1228.06	1148.88	8.30458	0.000537474	up
hsa_circ_0072157	98.4476	86.9917	87.6	678.34	556.923	600.197	8.30457	0.00152775	up
hsa_circ_0113468	21.3864	21.1184	14.6657	127.584	105.211	147.094	8.26639	0.00217616	up
hsa_circ_0060886	141.837	110.07	126.473	754.972	845.435	919.282	8.25789	0.00117101	up
hsa-circRNA14157-145	85.0601	96.478	69.4627	511.051	548.608	604.069	8.25727	0.000872667	up
hsa_circ_0046342	93.2512	77.2718	84.3272	598.809	524.661	574.152	8.25501	0.00137927	up
hsa-circRNA14207-6	2707.16	2428.53	2073.59	15846.6	15573.6	16392.1	8.25395	0.000681589	up
hsa_circ_0075503	23.1728	23.233	14.1637	87.4906	166.22	155.256	8.24794	0.00531361	up
hsa_circ_0066470	115.287	135.31	147.833	787.688	937.69	924.483	8.24793	0.00184989	up
hsa_circ_0019073	58.6816	33.8326	34.4776	328.777	247.701	248.754	8.24661	0.00554031	up
hsa-circRNA13726-1	139.916	94.044	100.882	757.609	765.601	676.386	8.24288	0.00216828	up
hsa_circ_0060889	122.637	119.518	79.0319	660.196	725.444	714.811	8.24275	0.001397	up
hsa_circ_0043721	184.256	262.762	174.328	951.845	1519.51	1721	8.23697	0.00418783	up
hsa_circ_0107873	53.5519	36.0395	41.181	293.252	281.98	283.041	8.23291	0.00198214	up
hsa-circRNA3628-7	29.959	33.905	24.9921	167.284	175.409	254.454	8.22952	0.0019772	up
hsa-circRNA4672	2.63338	5.18112	3.73434	20.7434	28.0864	25.7211	8.22947	0.00614293	up
hsa_circ_0040839	58.3545	59.5736	41.6815	378.412	336.427	334.667	8.22874	0.00163348	up
hsa_circ_0021958	199.402	245.89	232.469	1592.1	1311.53	1597.3	8.2155	0.0021606	up
hsa_circ_0019072	51.6806	50.35	26.0763	234.848	265.455	318.366	8.21444	0.00450268	up
hsa-circRNA15567-2	42.6041	55.3055	31.6813	252.026	292.133	296.024	8.20941	0.00215385	up
hsa-circRNA11733-37	142.309	139.916	118.418	870.058	870.51	908.344	8.20768	0.000568764	up
hsa_circ_0031940	86.3003	55.6332	64.7429	486.127	395.778	470.606	8.20303	0.0029764	up
hsa_circ_0138942	192.137	178.445	146.542	771.555	1328.41	1427.02	8.20134	0.00317997	up
hsa_circ_0130283	10.1104	7.16967	5.07183	56.4836	39.5161	47.9263	8.20001	0.00566737	up
hsa_circ_0046340	144.443	154.02	119.743	828.799	830.177	1124.07	8.19402	0.00127772	up
hsa_circ_0119862	5.06662	2.39683	3.82744	20.2274	23.6776	27.9888	8.17585	0.00700337	up
hsa_circ_0093828	399.74	437.556	345.726	2480.93	2660.82	2634.48	8.16823	0.000614336	up
hsa_circ_0111987	64.3916	35.4272	38.9261	283.81	317.367	282.642	8.15969	0.00383815	up
hsa_circ_0017653	11.1557	5.37427	8.73671	46.0017	46.9787	69.4836	8.15953	0.00826835	up
hsa_circ_0108448	8.66388	7.44738	4.82143	54.9028	43.4536	37.3778	8.15922	0.0052333	up
hsa_circ_0021527	62.9116	67.3198	38.0678	331.916	356.714	390.083	8.15753	0.00247612	up
hsa-circRNA13103-44	477.7	411.292	362.232	2669.92	2709.57	2817.48	8.15687	0.000667534	up
hsa_circ_0112076	4.91957	2.76907	4.15682	24.6871	23.356	28.0336	8.14784	0.00463174	up
hsa_circ_0089561	580.994	553.443	422.001	3736.3	3015.08	3436.7	8.14659	0.00168948	up
hsa_circ_0115437	53.689	48.9023	48.2661	429.265	265.674	316.076	8.13837	0.00424371	up
hsa-circRNA4632-2	30.2662	22.504	20.2617	135.196	189.606	151.091	8.10192	0.00189568	up
hsa_circ_0051431	46.7076	44.6445	38.6395	278.437	253.811	319.189	8.09531	0.000921152	up
hsa_circ_0040841	53.4376	36.2394	46.0855	368.334	269.225	250.611	8.08083	0.0053082	up
hsa_circ_0024578	796.452	647.847	734.413	4338.91	4680.49	5194.91	8.08029	0.00107106	up
hsa-circRNA14157-194	45.0079	45.3403	30.6506	249.454	255.106	273.304	8.07698	0.0012452	up
hsa_circ_0094768	11.7838	25.2255	18.3311	93.7943	138.826	116.26	8.0746	0.00868332	up
hsa_circ_0136794	15.349	12.0291	6.33631	56.8558	82.5859	68.9136	8.06268	0.00725071	up
hsa_circ_0046349	251.139	176.73	171.646	1179.73	1283.78	1391.15	8.06241	0.00142118	up
hsa_circ_0052002	34.1378	20.5901	22.929	171.232	163.193	158.302	8.04204	0.00304667	up
hsa_circ_0117956	61.1945	105.685	79.6998	538.671	397.409	655.386	8.01974	0.00703841	up
hsa_circ_0139544	31.1831	54.2522	36.2765	236.476	257.383	274.361	8.01882	0.00372545	up
hsa_circ_0105716	16.9987	19.7761	9.67596	112.353	95.6774	81.5534	7.99335	0.00650019	up
hsa_circ_0100188	21.7718	17.531	13.232	89.2083	129.607	117.437	7.98676	0.00213551	up
hsa_circ_0112998	154.15	141.859	106.799	555.268	991.305	1130.28	7.96241	0.00474463	up
hsa_circ_0025323	2206.55	1959.66	2040.33	12609.6	13156	14134.4	7.95616	0.000687826	up
hsa_circ_0078541	1301.09	1455.2	1151.67	7739.65	8256.39	9054.13	7.95184	0.000634638	up
hsa_circ_0074395	22.0532	23.7794	23.7653	151.044	165.354	131.874	7.94125	0.00169208	up
hsa-circRNA840-2	728.26	842.779	689.564	5144.68	4546.97	4774.22	7.93726	0.00129276	up
hsa_circ_0017607	117.835	130.2	103.935	711.366	752.952	778.711	7.91403	0.000614336	up
hsa-circRNA6082-6	1408.71	1169.44	1031.73	7818.34	7390.61	7668.58	7.90525	0.00104193	up
hsa_circ_0099193	58.8206	60.7019	67.2427	290.305	408.221	528.115	7.905	0.00341135	up
hsa_circ_0024295	257.344	212.081	187.538	1142.89	1699.53	1372.07	7.90197	0.00158463	up
hsa_circ_0123084	76.7293	51.3269	61.3603	409.085	356.762	427.211	7.87797	0.00251081	up
hsa_circ_0121535	5.49941	6.27225	3.61732	34.7216	32.5112	28.4965	7.8759	0.00329317	up
hsa_circ_0009552	47.2411	47.147	34.0986	282.889	254.382	269.966	7.8554	0.00133925	up
hsa-circRNA6988-106	33.3985	34.5252	20.7445	178.26	173.347	195.908	7.82745	0.00220544	up
hsa-circRNA1714-11	6.81036	3.42186	5.7776	30.2313	37.586	29.7741	7.80875	0.0074093	up
hsa-circRNA12844-8	9.78262	5.21514	4.17899	31.3833	37.3096	45.6752	7.80435	0.0074186	up
hsa_circ_0071236	156.644	156.746	117.112	786.042	863.616	1053.73	7.7827	0.00107106	up
hsa_circ_0087728	52.5591	49.6624	39.9844	280.356	314.913	293.618	7.77869	0.000640265	up
hsa-circRNA15685-16	6.0168	7.75823	4.47492	26.4576	50.0319	39.1832	7.77789	0.00530695	up
hsa_circ_0125111	92.9662	91.2899	73.6902	476.8	596.039	546.307	7.77734	0.000632396	up
hsa_circ_0098300	35.4444	39.3792	40.8353	223.3	269.728	234.472	7.77236	0.0014392	up
hsa_circ_0078646	119.771	136.075	87.9884	551.83	746.676	858.627	7.76121	0.00224323	up
hsa-circRNA7141-16	4.9473	2.91845	3.64338	17.5162	32.8262	22.5135	7.75461	0.00644924	up
hsa-circRNA1541-7	71.9642	70.0687	57.3497	404.121	364.76	481.752	7.74922	0.00119482	up
hsa_circ_0127192	372.558	325.406	268.365	2085.68	1876.18	2041.27	7.74866	0.00117814	up
hsa_circ_0016394	21.5219	22.7343	29.3641	124.529	139.242	203.355	7.7477	0.00472514	up
hsa_circ_0130598	7.16409	9.15995	4.37906	35.647	44.9863	43.7842	7.73623	0.00451465	up
hsa-circRNA10719-2	35.422	36.0879	50.4215	210.486	290.047	257.41	7.73077	0.00406197	up
hsa-circRNA9232-4	21.2962	12.0624	9.99662	92.1863	89.2218	76.0644	7.72877	0.00638571	up
hsa_circ_0011322	70.1732	49.3373	44.5991	305.794	374.08	327.987	7.72195	0.00186071	up
hsa_circ_0103705	22.2457	25.4567	18.2017	114.755	135.165	161.343	7.71987	0.00130942	up
hsa-circRNA11372-5	408.109	422.122	371.638	2470.48	2335.2	2654.86	7.68196	0.000717353	up
hsa-circRNA173-12	87.4588	120.855	104.4	382.311	763.092	901.93	7.67362	0.00897168	up
hsa_circ_0046351	89.2244	78.9429	86.7966	523.088	486.497	572.29	7.67111	0.00121683	up
hsa-circRNA9702-10	102.718	105.003	101.992	482.757	670.275	808.016	7.66531	0.00200486	up
hsa_circ_0070707	23.0058	22.7426	13.0327	128.562	110.117	114.171	7.65841	0.00379391	up
hsa_circ_0104768	11.6464	12.9733	12.5428	69.915	79.0985	80.8443	7.64629	0.000906912	up
hsa_circ_0033578	55.8611	64.9109	52.1761	341.488	345.009	378.759	7.64582	0.000814204	up
hsa_circ_0091328	97.3798	114.661	69.0096	458.007	513.484	768.751	7.63245	0.00395479	up
hsa-circRNA9423-9	49.8538	45.6279	57.0035	311.048	299.067	325.631	7.62134	0.00193171	up
hsa-circRNA5363-1	399.714	427.929	340.27	2116.35	2725.51	2349.68	7.61319	0.000864335	up
hsa-circRNA9232-2	15.8843	19.5935	8.87924	67.5926	82.2174	114.633	7.58764	0.00757175	up
hsa_circ_0128422	109.863	78.728	126.144	631.876	681.275	581.318	7.57487	0.00477916	up
hsa_circ_0102268	5.42227	4.15595	7.05682	23.731	41.9872	36.4767	7.56596	0.00789815	up
hsa_circ_0032811	28.5133	20.2873	16.4653	150.776	105.194	137.247	7.56595	0.00468106	up
hsa_circ_0025433	8.53363	5.75671	3.75739	24.3775	44.1422	39.0576	7.55648	0.00845218	up
hsa_circ_0060013	303.019	223.936	232.545	1174.07	1675.79	1826.16	7.55646	0.00216437	up
hsa-circRNA15976-2	75.1625	58.4624	73.4058	424.33	405.953	426.274	7.55592	0.00189262	up
hsa_circ_0006934	23.6536	22.0088	12.0152	120.877	105.813	111.127	7.55139	0.00484302	up
hsa_circ_0040633	16.8076	16.7169	8.47996	63.1418	83.6074	102.481	7.5495	0.00615179	up
hsa_circ_0098298	196.668	188.854	155.155	896.504	1084.53	1343.8	7.54575	0.00124246	up
hsa_circ_0060894	444.334	347.979	291.715	2091.13	2020.37	2406.75	7.53139	0.00147209	up
hsa_circ_0051539	96.6774	66.1119	65.7615	447.199	404.016	522.062	7.51997	0.00233845	up
hsa_circ_0046357	240.632	224.642	235.393	1447.3	1368.63	1427.28	7.49502	0.00104293	up
hsa-circRNA10283-4	3.01661	2.57287	4.09024	14.8637	22.3134	21.207	7.48795	0.00566112	up
hsa-circRNA12146-4	40.4495	27.4344	25.2149	151.542	207.212	197.257	7.4858	0.00236946	up
hsa-circRNA6167-8	19.1253	11.533	9.96439	73.9892	83.5576	78.5817	7.48213	0.00384731	up
hsa_circ_0051402	191.256	193.959	154.773	849.616	1384.72	1077.73	7.47985	0.00198063	up
hsa-circRNA13321-35	8.3092	5.03029	4.29075	30.7073	39.8395	32.343	7.47742	0.00448627	up
hsa_circ_0043200	34.61	39.1232	31.6303	227.587	199.225	208.298	7.47618	0.00132939	up
hsa_circ_0024268	253.138	206.31	203.419	1180.56	1517.73	1306.59	7.47455	0.00104293	up
hsa-circRNA12268-5	8.08719	8.35935	4.17834	47.2026	32.8737	40.1022	7.47372	0.00756146	up
hsa_circ_0055983	281.139	303.022	159.592	1092.88	1845.96	1483.6	7.47199	0.00563879	up
hsa_circ_0054100	9.5385	10.7402	4.82915	40.488	47.7006	56.2581	7.46605	0.00658883	up
hsa_circ_0019246	2.73108	2.63649	3.8771	15.7426	18.3143	21.2342	7.46243	0.00440009	up
hsa_circ_0089974	71.2872	44.6843	57.2537	317.216	358.302	351.552	7.46006	0.00267434	up
hsa_circ_0072384	66.7864	47.5095	58.4408	300.454	390.492	345.729	7.45615	0.00203819	up
hsa_circ_0012962	86.1671	73.0201	55.947	421.4	382.055	477.6	7.45262	0.0017093	up
hsa_circ_0001680	7.21898	9.2666	4.85111	42.4719	46.9361	35.549	7.4519	0.00474043	up
hsa_circ_0127601	41.1908	27.5955	17.7439	153.037	166.249	173.056	7.45107	0.00574806	up
hsa_circ_0094979	263.04	230.816	176.157	1109.09	1500.83	1400.6	7.44748	0.00135419	up
hsa-circRNA7736-3	62.1112	65.0044	44.8564	321.761	374.716	326.114	7.43745	0.00131141	up
hsa_circ_0066479	52.1795	62.5941	39.1325	297.335	319.902	291.22	7.43313	0.00183916	up
hsa_circ_0056124	12.0189	5.88772	7.66245	59.3387	47.1977	41.9388	7.43188	0.00895894	up
hsa_circ_0099208	28.8236	18.0183	13.2235	92.9976	102.036	156.094	7.4211	0.0076507	up
hsa_circ_0048898	1023.49	1006.44	1029.95	5973.73	6748.73	5671.18	7.41911	0.0011926	up
hsa-circRNA12585	58.612	46.2081	62.3403	372.038	339.769	287.75	7.41831	0.00393541	up
hsa-circRNA3279-1	10.4699	6.05864	4.42933	30.499	46.3772	42.7608	7.41641	0.00783423	up
hsa-circRNA13692-2	27.3801	18.4878	17.8573	141.416	94.4741	145.053	7.4063	0.00528987	up
hsa_circ_0046940	7.10519	3.45859	3.96229	28.6334	25.487	28.5706	7.40339	0.00659801	up
hsa_circ_0016393	28.9779	26.0937	15.2132	143.969	111.71	152.985	7.40051	0.0051787	up
hsa-circRNA11733-51	265.438	277.67	332.769	2041.27	1692.33	1514.06	7.39319	0.00426081	up
hsa_circ_0056015	299.441	242.856	217.796	1513.36	1608.88	1379.36	7.37925	0.00134873	up
hsa_circ_0027745	49.8751	52.9561	35.7299	215.751	347.796	265.202	7.36561	0.0026967	up
hsa_circ_0095398	271.718	228.925	217.867	1411.47	1528.78	1323.61	7.36421	0.00106106	up
hsa_circ_0110764	18.9806	10.8326	11.7338	64.7355	91.4606	85.628	7.35707	0.00413637	up
hsa_circ_0115453	586.791	597.702	371.498	2549.54	3190.56	3361.26	7.35365	0.00207492	up
hsa_circ_0048872	2307.74	1778.41	2242.99	11876.4	13774.1	11770.3	7.34567	0.00205432	up
hsa-circRNA14157-158	142.574	174.897	109.805	687.49	820.521	1014.66	7.34421	0.00234609	up
hsa_circ_0080311	1446.78	1313.91	856.454	7115.08	7397.64	6459.34	7.3417	0.00258375	up
hsa_circ_0070350	331.82	246.444	285.756	1521.07	1932.49	1660.02	7.34156	0.00168948	up
hsa_circ_0112087	272.735	241.269	267.097	1545.47	1517.06	1557.3	7.32896	0.00113851	up
hsa_circ_0017431	28.0502	17.166	25.8756	133.674	136.339	141.927	7.32737	0.00416952	up
hsa_circ_0102408	29.1856	14.7607	14.3935	93.3731	133.784	102.907	7.32391	0.00735828	up
hsa_circ_0091321	76.0813	101.965	87.7584	369.28	640.432	595.119	7.31709	0.00408258	up
hsa_circ_0071305	9.77231	14.9713	11.2107	63.6783	70.3021	75.5266	7.31012	0.00260569	up
hsa_circ_0058196	421.936	481.938	398.657	2582.72	2678.4	2415.21	7.30956	0.00108423	up
hsa-circRNA1628-10	1240.94	1196.08	995.002	6709.24	6412.03	7070.63	7.30801	0.000695691	up
hsa_circ_0066401	170.888	122.131	142.966	720.289	829.029	1028.14	7.30556	0.00215837	up
hsa-circRNA7603-9	199.346	165.855	136.85	775.232	1113.99	1076.85	7.30292	0.00161267	up
hsa-circRNA37-4	31.3059	37.7897	20.7599	175.384	169.323	169.709	7.299	0.00313728	up
hsa_circ_0062139	7.87978	10.4341	9.0282	60.538	45.1457	55.6948	7.29733	0.00341135	up
hsa_circ_0097149	5.97082	10.1819	4.63991	32.3696	38.3468	46.5199	7.2931	0.00702222	up
hsa_circ_0025423	62.7207	61.2755	81.7948	328.641	481.757	405.097	7.28499	0.00370081	up
hsa_circ_0082173	19.0638	25.0705	13.3383	94.2464	102.401	134.466	7.27955	0.00405926	up
hsa-circRNA173-10	68.4927	75.7345	66.3209	483.324	360.654	400.819	7.27384	0.0024906	up
hsa-circRNA6096-13	77.7486	110.051	81.8179	513.323	542.015	510.66	7.27222	0.0020137	up
hsa_circ_0086454	257.768	239.072	235.872	1387.08	1328.17	1599.59	7.26961	0.000882317	up
hsa_circ_0039724	39.2838	45.6181	44.634	188.336	297.469	288.283	7.25984	0.0026532	up
hsa_circ_0046936	11.8676	9.38173	6.88473	40.1412	58.9845	65.085	7.24926	0.00350686	up
hsa_circ_0046346	246.827	188.439	195.539	1133.86	1254.9	1284.31	7.24796	0.00102404	up
hsa_circ_0050603	10.9243	7.41239	8.16394	51.6628	50.6213	50.7563	7.24632	0.00201019	up
hsa-circRNA173-27	80.6636	99.5548	79.0418	385.366	581.651	568.334	7.24517	0.00202643	up
hsa_circ_0127187	401.595	352.455	329.353	1814.28	2375.62	2164.65	7.23835	0.00079075	up
hsa-circRNA8990-15	26.203	25.7887	18.9943	131.662	174.607	111.566	7.23467	0.00325398	up
hsa_circ_0056121	61.1798	62.7216	50.451	359.321	325.765	329.31	7.22603	0.00112853	up
hsa_circ_0080312	1114.08	1157.49	874.939	5343.19	6707.79	6227.4	7.2104	0.000813049	up
hsa_circ_0113000	77.4176	93.6733	82.4845	488.021	481.243	503.101	7.20683	0.00122033	up
hsa_circ_0047671	247.945	195.785	135.912	810.405	1149.27	1397.81	7.20435	0.00460593	up
hsa-circRNA11512-7	2244	2064.13	2101.89	11158	12589.4	13664.5	7.20233	0.000660421	up
hsa_circ_0135300	8.31546	9.67261	3.88587	31.9307	41.9661	45.9809	7.20205	0.00959606	up
hsa-circRNA4698-1	2.69281	3.3187	4.39857	17.1618	21.8996	20.5296	7.1917	0.00544253	up
hsa_circ_0067037	50.5358	40.1296	25.3246	179.929	256.67	217.712	7.18542	0.0044606	up
hsa_circ_0093390	265.488	372.131	196.884	1507.12	1419.64	1774.81	7.17867	0.00399654	up
hsa-circRNA3105-3	708.143	835.086	695.871	4031.28	4457.47	4466.79	7.17656	0.000813277	up
hsa_circ_0102417	25.9412	18.556	23.5284	142.199	116.519	133.206	7.17439	0.0030932	up
hsa_circ_0078645	207.88	199.408	134.124	889.53	1034.27	1175.71	7.17045	0.00168948	up
hsa_circ_0013434	214.79	206.255	186.651	1115.24	1265.31	1139.46	7.16925	0.000614336	up
hsa-circRNA2380-2	1696.66	1556.09	2196.51	10588.9	8343.58	12746.9	7.16609	0.0056401	up
hsa_circ_0114226	2.76017	2.68908	3.926	15.845	17.4177	20.4732	7.16242	0.00446417	up
hsa_circ_0101407	20.3494	17.935	12.6766	91.8557	98.2663	98.723	7.14648	0.00154559	up
hsa_circ_0078552	581.3	432.712	467.394	3016.85	2775.53	2700.75	7.14334	0.00187458	up
hsa_circ_0042377	32.4953	32.286	35.2497	196.37	185.012	195.702	7.14213	0.001397	up
hsa_circ_0075634	27.7822	15.871	13.053	90.7101	107.382	113.571	7.14156	0.00554968	up
hsa-circRNA173-20	81.2974	78.8421	84.4562	377.246	478.137	576.647	7.1407	0.00175705	up
hsa-circRNA7763-2	1126.46	1090.92	1110.78	5751.48	6760.79	6738.95	7.13857	0.000683285	up
hsa-circRNA1916-1	4.06905	7.56804	3.59377	27.0996	27.23	28.5568	7.1192	0.00698956	up
hsa_circ_0125074	72.6024	100.991	95.342	461.826	603.647	476.471	7.11423	0.00340237	up
hsa_circ_0117860	19.2735	18.9942	18.0111	73.1484	107.514	159.152	7.11195	0.00532614	up
hsa_circ_0121689	11.0589	12.7194	11.0168	71.3054	68.1903	60.433	7.10935	0.00165685	up
hsa_circ_0114707	8.72027	5.53825	5.41405	36.1303	27.3043	50.2215	7.10761	0.00711253	up
hsa_circ_0082469	6.10748	8.74821	3.89484	29.7929	32.2712	40.9629	7.10477	0.00668591	up
hsa_circ_0098301	382.07	386.198	400.411	2563.09	1883.94	2311.71	7.10073	0.00275232	up
hsa_circ_0012964	75.3438	70.815	52.8218	370.756	380.883	376.545	7.09749	0.00105107	up
hsa_circ_0121763	65.2589	62.6486	64.2697	403.738	309.347	396.858	7.09701	0.00217725	up
hsa_circ_0082174	34.8433	46.075	20.2476	168.168	181.618	200.746	7.09682	0.00628343	up
hsa_circ_0080831	2.43876	2.3535	3.74914	12.1608	18.4946	17.9938	7.08989	0.00724708	up
hsa-circRNA11434-24	430.116	402.964	318.451	2093.62	2210.55	2236.94	7.0836	0.000694583	up
hsa_circ_0099198	49.8075	29.1878	33.1082	221.625	197.845	205.652	7.08081	0.00397834	up
hsa_circ_0071243	39.3191	49.156	23.0251	178.987	172.809	269.268	7.07834	0.00762061	up
hsa_circ_0102123	44.534	23.2491	25.1632	159.514	160.595	189.695	7.07036	0.00535759	up
hsa_circ_0046932	43.8802	32.0402	31.1179	168.481	231.805	208.78	7.06855	0.00171779	up
hsa-circRNA11124-10	100.816	99.2128	70.3054	416.233	601.973	521.963	7.06356	0.00171976	up
hsa_circ_0139477	5.77011	2.97864	3.78882	19.9807	19.9313	30.3017	7.0551	0.00737076	up
hsa-circRNA885-9	240.932	202.843	166.52	1176.27	948.039	1351.88	7.05424	0.00247096	up
hsa_circ_0111904	10.6117	7.60546	8.63417	55.3866	48.7378	47.8112	7.05381	0.00250833	up
hsa-circRNA12675-3	685.851	783.666	565.872	2851.38	4550.2	4338.2	7.0519	0.00238077	up
hsa_circ_0098903	5.27904	6.57743	3.67376	26.4558	21.7551	41.0088	7.05147	0.00756575	up
hsa_circ_0062059	46.5579	36.4641	32.1827	214.086	215.978	218.385	7.04877	0.00122089	up
hsa_circ_0070702	69.5866	63.3536	74.8507	390.119	385.082	405.425	7.04569	0.00153609	up
hsa-circRNA13692-1	41.7723	34.8337	38.5974	216.76	208.343	229.044	7.04061	0.0012009	up
hsa_circ_0078551	591.266	435.262	487.394	2982.7	2914.92	2654.87	7.03865	0.00199404	up
hsa_circ_0023829	50.7688	44.2402	55.2344	294.122	312.228	248.243	7.03534	0.00288221	up
hsa_circ_0096531	69.7606	49.2202	44.3999	281.212	351.903	282.741	7.03241	0.00238316	up
hsa_circ_0105710	222.483	208.963	256.82	1187.01	1354.23	1362.89	7.03189	0.00175807	up
hsa_circ_0121285	18.6071	14.307	12.6825	85.6083	56.2819	128.362	7.02799	0.0098904	up
hsa-circRNA11434-7	124.48	145.178	137.135	772.83	711.494	825.315	7.02712	0.00148226	up
hsa_circ_0133444	9.5556	9.20843	4.35246	35.0838	39.4317	50.5162	7.0189	0.00779535	up
hsa_circ_0043264	24.9966	34.3647	25.1354	183.666	114.474	187.332	7.01816	0.0064765	up
hsa_circ_0024269	189.149	208.166	184.836	945.832	1185.18	1183.29	7.01612	0.00078557	up
hsa_circ_0128540	106.645	90.9097	102.9	423.396	668.699	641.652	7.01409	0.0025012	up
hsa-circRNA6949-2	428.142	515.192	497.764	2876.46	2359.71	2940.61	7.01012	0.00248539	up
hsa-circRNA11733-28	146.823	143.624	138.256	726.197	858.202	848.667	7.0053	0.000568764	up
hsa-circRNA4585-10	89.8333	97.0817	41.5219	399.625	375.087	437.434	7.00083	0.00854215	up
hsa_circ_0070703	100.855	111.938	99.7518	563.836	592.295	609.629	6.99715	0.000700211	up
hsa-circRNA13222-2	969.363	922.033	903.789	5034.94	5432.67	5333.87	6.99494	0.000613263	up
hsa_circ_0060891	467.536	390.167	227.184	1976.14	1853.19	2043.47	6.99449	0.00481182	up
hsa_circ_0064435	32.7972	27.8777	15.439	99.2149	156.576	163.722	6.9893	0.00739276	up
hsa_circ_0043741	91.2083	100.337	102.371	629.434	538.996	496.962	6.98655	0.00274316	up
hsa_circ_0062057	89.3693	77.6857	56.5358	332.299	433.272	490.02	6.98368	0.00209411	up
hsa-circRNA173-19	236.175	179.793	133.799	707.452	1142.39	1262.62	6.98194	0.0051189	up
hsa_circ_0017997	282.746	289.469	215.144	1502.92	1209.17	1737.32	6.97792	0.00233495	up
hsa_circ_0094359	58.5566	73.032	39.8229	274.082	334.719	331.384	6.96773	0.00304708	up
hsa_circ_0024739	24.4279	13.8363	17.7781	94.6596	109.757	103.126	6.96509	0.00397389	up
hsa_circ_0027581	105.252	95.4105	86.936	644.25	437.716	550.659	6.95936	0.00324252	up
hsa-circRNA10625-13	173.408	154.77	141.415	739.812	1003.24	905.619	6.94928	0.00088685	up
hsa_circ_0131491	18.603	9.72115	9.94566	80.545	58.6405	67.4369	6.94919	0.00819081	up
hsa_circ_0065891	2.71312	5.26108	3.49936	17.844	20.2974	24.4138	6.94831	0.00675449	up
hsa_circ_0074899	95.1707	85.8839	60.9841	433.711	421.611	482.166	6.94641	0.00160311	up
hsa_circ_0135985	16.4185	18.0601	20.226	98.5971	78.4966	136.572	6.93807	0.0054521	up
hsa_circ_0106689	153.132	181.654	169.865	774.536	1025.88	1047.71	6.93727	0.00155061	up
hsa_circ_0094972	99.2493	98.7686	70.2289	415.191	490.351	594.211	6.93126	0.00157271	up
hsa_circ_0025321	122.426	96.9714	92.8341	535.433	605.994	596.678	6.93048	0.000882317	up
hsa_circ_0013759	41.6339	40.6788	25.5422	207.753	180.006	202.721	6.92502	0.00280798	up
hsa_circ_0071239	107.886	126.312	81.1424	560.017	483.257	715.142	6.92213	0.00315328	up
hsa_circ_0017806	11.6801	10.3523	7.21286	49.626	50.4916	60.8738	6.92028	0.00191807	up
hsa_circ_0102124	28.0392	23.2754	26.4616	139.274	127.028	170.603	6.91872	0.00193855	up
hsa_circ_0091733	124.034	98.4976	69.6392	505.736	507.75	578.951	6.91831	0.00254283	up
hsa_circ_0139916	219.528	194.721	184.85	917.136	1217.42	1236.22	6.91752	0.000907497	up
hsa_circ_0010520	30.7458	19.867	15.9118	121.159	116.457	120.259	6.9162	0.00405633	up
hsa_circ_0133096	29.743	20.883	21.0706	96.4699	176.112	134.187	6.9111	0.00450608	up
hsa_circ_0098303	156.174	182.835	134.379	929.615	753.851	950.053	6.90208	0.00201477	up
hsa_circ_0025751	166.855	129.653	141.176	825.063	769.184	833.459	6.89776	0.00141921	up
hsa_circ_0137162	36.7266	26.8982	30.878	147.348	202.475	176.433	6.88941	0.00195151	up
hsa-circRNA14157-123	44.8588	41.0225	42.3249	206.096	247.935	262.78	6.88725	0.000808357	up
hsa_circ_0096545	90.9909	96.9271	62.6518	410.548	527.167	439.996	6.88646	0.00194743	up
hsa-circRNA12915	9.4921	10.9033	12.4755	63.8525	43.6257	79.7374	6.88232	0.00763356	up
hsa_circ_0131458	18.5132	11.4251	7.60991	65.512	60.019	70.2596	6.877	0.00793849	up
hsa_circ_0083084	40.1422	44.4504	23.1104	138.523	197.176	258.755	6.87376	0.0072282	up
hsa_circ_0041051	23.2548	31.5933	12.936	106.821	117.606	129.62	6.87307	0.00802326	up
hsa-circRNA13103-72	231.201	224.882	248.139	1375.59	1150.47	1396.76	6.87305	0.00201477	up
hsa-circRNA16245-1	3.7275	2.61991	5.19859	19.2176	19.4914	23.1054	6.86155	0.00932367	up
hsa_circ_0046354	892.353	859.866	823.578	5053.32	4619.4	4609.5	6.85882	0.00114498	up
hsa_circ_0001711	3392.09	2918.02	3228.14	15272.2	19577.2	18195.2	6.85859	0.00115335	up
hsa-circRNA5147-13	15.5947	26.4331	15.5717	114.913	105.343	90.246	6.85775	0.00616844	up
hsa_circ_0139128	4.59773	7.05766	3.7281	33.8927	22.5624	26.9172	6.85717	0.00804832	up
hsa_circ_0067512	653.801	571.945	651.331	3195.05	3724.84	3478.13	6.85453	0.0011893	up
hsa_circ_0127196	68.6149	34.1895	30.5557	214.388	251.757	225.396	6.85134	0.0081132	up
hsa_circ_0083466	3340.16	2701.21	2903.7	18487.4	15135.8	15886.4	6.85086	0.00220231	up
hsa-circRNA15425-4	3167.56	2498.62	2472.69	17321.6	12896.6	14860.7	6.8502	0.00282562	up
hsa_circ_0002235	14.1983	10.2952	11.055	62.935	72.6705	59.7631	6.84363	0.00194174	up
hsa_circ_0123992	26.3164	30.6575	21.1217	132.001	134.776	161.615	6.83797	0.00136547	up
hsa_circ_0059220	25.0791	17.892	25.7323	118.516	138.462	118.696	6.83752	0.0035598	up
hsa_circ_0115445	255.226	202.445	182.183	1144.57	1208.51	1146.03	6.83361	0.00114292	up
hsa_circ_0010012	229.805	234.759	209.467	875.187	1395.23	1556.74	6.83109	0.00288345	up
hsa_circ_0125061	196.944	198.597	215.306	1131.01	1040.39	1202.14	6.82782	0.00153609	up
hsa-circRNA9702-2	170.065	181.387	163.421	824.304	1067.18	962.195	6.82684	0.000832867	up
hsa_circ_0078553	112.362	116.716	124.044	726.622	539.774	695.011	6.82228	0.00305157	up
hsa-circRNA1721-23	963.931	557.423	712.1	3542.02	4472.77	4044.97	6.82115	0.00395479	up
hsa_circ_0071246	216.53	280.208	186.351	970.757	1261.63	1542.46	6.81568	0.00281306	up
hsa_circ_0071225	63.6962	81.9234	52.9648	335.25	371.57	370.465	6.81423	0.00167314	up
hsa_circ_0135142	16.3823	15.2313	9.68485	70.2966	67.8713	84.498	6.81221	0.00271167	up
hsa-circRNA1541-3	341.178	335.011	244.252	1471.05	2182.95	1447.55	6.80784	0.00311297	up
hsa-circRNA11809-3	397.339	317.431	385.159	2085.53	1854.4	2087.96	6.804	0.00207459	up
hsa_circ_0043743	496.631	465.498	410.846	2200.17	2783.61	2576.65	6.80295	0.000614336	up
hsa-circRNA1893-7	81.493	60.4793	56.9567	394.027	295.756	400.166	6.80263	0.00321982	up
hsa_circ_0137805	43.0318	29.0938	16.2637	150.56	140.881	159.282	6.79998	0.00981138	up
hsa_circ_0032943	9.09144	5.74746	4.3375	32.7481	36.3799	31.5489	6.79875	0.00535836	up
hsa_circ_0046330	171.837	128.359	114.909	758.592	734.661	754.109	6.79848	0.00163199	up
hsa_circ_0071238	190.736	218.864	228.892	1222.97	1137.6	1138.39	6.79758	0.00215438	up
hsa_circ_0035433	37.6305	22.5613	17.3452	143.936	147.469	114.868	6.79511	0.00762948	up
hsa_circ_0048853	2145.07	2087.73	1388.2	9477.47	12456.8	8702.53	6.7909	0.0032789	up
hsa_circ_0055977	129.347	149.16	156.266	719.098	988.123	700.018	6.78702	0.00325711	up
hsa_circ_0036324	110.674	89.0324	78.4533	482.333	495.058	531.318	6.77514	0.00101454	up
hsa-circRNA8990-17	22.538	23.6606	18.6704	82.7639	160.524	122.457	6.76535	0.00412725	up
hsa_circ_0045871	346.712	342.982	239.702	1543.8	1689.8	1782.3	6.76133	0.00115392	up
hsa_circ_0046343	539.569	519.311	533.228	3071.51	2640.49	2993.62	6.75278	0.0014586	up
hsa-circRNA13725-1	51.4184	42.964	28.2831	207.791	195.501	249.714	6.75083	0.00339983	up
hsa-circRNA10050	374.421	398.159	325.552	1645.89	2288.87	2086.62	6.74544	0.00102439	up
hsa_circ_0091329	40.9173	37.5312	23.0508	159.556	202.469	176.914	6.7383	0.00310917	up
hsa_circ_0002970	11.3215	13.7108	9.48486	46.8847	85.0359	59.619	6.73814	0.00433799	up
hsa-circRNA9645-30	21.581	16.0977	14.1159	76.1752	90.9953	114.126	6.73636	0.00235044	up
hsa-circRNA6158-14	37.2887	38.5072	38.1162	205.41	188.968	225.669	6.71871	0.00120882	up
hsa_circ_0121767	71.4801	51.7353	34.3605	255.315	240.997	330.417	6.718	0.00566695	up
hsa-circRNA14056	163.772	122.105	130.254	682.186	751.56	811.196	6.71342	0.00125797	up
hsa-circRNA14157-161	220.148	271.729	188.057	1214.13	1145.82	1287.1	6.70633	0.00155846	up
hsa_circ_0006432	201.926	181.392	107.332	726.926	965.284	890.552	6.7033	0.00387385	up
hsa-circRNA14157-6	308.85	372.993	345.037	1948.01	1629.2	1990.67	6.70324	0.00220239	up
hsa_circ_0007075	84.2205	83.2854	69.4211	414.923	442.17	420.79	6.69754	0.000614336	up
hsa_circ_0062067	1535.44	1356.69	1348.74	7026.83	8588.71	7359.58	6.69115	0.00091727	up
hsa-circRNA10237-2	14.1455	14.1974	9.19837	71.5022	53.4297	76.4247	6.69064	0.0040027	up
hsa_circ_0043717	774.556	914.811	661.691	3759.02	4079.34	4830.02	6.68949	0.0012366	up
hsa_circ_0094968	675.981	767.667	661.498	3742.01	3767.77	3842.56	6.68743	0.000882317	up
hsa_circ_0133438	33.1816	20.1906	26.4724	144.77	124.329	155.415	6.68604	0.00438913	up
hsa_circ_0071237	206.022	204.262	144.119	914.68	914.234	1143.11	6.68443	0.00152775	up
hsa_circ_0042339	235.956	201.5	209.547	1267.46	1082.73	1141.35	6.67876	0.00167535	up
hsa_circ_0070704	118.741	136.04	104.264	677.602	594.061	656.378	6.67402	0.00140775	up
hsa_circ_0096471	81.386	83.0533	56.5136	379.013	359.939	439.142	6.67334	0.00167312	up
hsa_circ_0083081	167.726	157.961	134.547	787.785	910.716	778.627	6.67164	0.000864335	up
hsa_circ_0056117	84.1188	39.0932	54.2646	282.235	314.33	315.111	6.67089	0.00760502	up
hsa_circ_0115152	19.1185	12.7635	18.6424	82.7433	78.2097	109.787	6.66409	0.00500187	up
hsa_circ_0109195	25.5126	18.5027	16.4112	114.618	98.3867	106.995	6.65798	0.00255307	up
hsa_circ_0046350	484.062	388.455	423.263	2436.04	2203.88	2304.29	6.65355	0.00158456	up
hsa_circ_0105706	195.438	159.072	118.694	720.662	851.653	933.114	6.65019	0.00189922	up
hsa_circ_0083759	34.505	26.6675	24.0825	157.606	146.385	148.976	6.64876	0.0016192	up
hsa_circ_0128421	117.712	85.445	104.12	584.733	497.473	555.826	6.63858	0.00272482	up
hsa_circ_0060907	186.468	150.55	135.162	783.083	884.174	846.053	6.63849	0.000923173	up
hsa_circ_0111888	52.9123	62.1117	35.3721	250.215	225.867	317.19	6.63589	0.00398023	up
hsa_circ_0025007	156.55	153.734	94.9719	602.434	744.96	783.569	6.63083	0.00249125	up
hsa-circRNA8492-2	46.7326	53.2427	35.6653	273.553	224.494	221.472	6.62238	0.0029443	up
hsa_circ_0046328	567.978	512.768	725.118	3309.9	2951.82	3309.05	6.61988	0.00410187	up
hsa_circ_0046331	381.193	387.757	353.995	2035.97	1977.14	1987.85	6.61757	0.000809725	up
hsa_circ_0001956	19.7421	18.0465	16.107	90.1066	92.6302	104.628	6.60674	0.000609408	up
hsa_circ_0025749	55.1543	42.1357	51.257	247.898	263.153	277.581	6.60435	0.00165914	up
hsa_circ_0121707	11.9932	10.4944	10.0759	59.9473	46.6225	68.8265	6.59955	0.00258402	up
hsa_circ_0060903	706.549	714.651	535.811	3207.26	3549	3599.88	6.59621	0.000727637	up
hsa_circ_0133442	16.6018	11.5038	7.84565	59.2942	57.6181	66.4008	6.5954	0.00518015	up
hsa_circ_0137519	19.7611	11.1095	10.6886	65.1533	62.2665	87.2169	6.5865	0.00611562	up
hsa_circ_0043722	837.176	899.792	602.789	3388.58	4258.81	4738.57	6.58381	0.00171332	up
hsa_circ_0114111	77.5502	72.9036	67.3733	382.966	348.037	429.98	6.58172	0.00102404	up
hsa_circ_0115454	306.462	228.102	211.224	1290.34	1238.85	1388.63	6.57991	0.00157271	up
hsa-circRNA10720	13.956	13.9026	8.59656	45.2648	85.8853	64.47	6.57888	0.00601726	up
hsa-circRNA13222-10	731.192	559.456	516.937	3089.82	3442.28	2983.94	6.57626	0.00153609	up
hsa_circ_0043198	433.89	348.058	448.734	2190.23	1990.22	2332.13	6.5752	0.00255056	up
hsa_circ_0046371	1094.8	948.185	961.714	5186.13	5297.99	5447.1	6.5738	0.000774626	up
hsa-circRNA173-40	214.86	186.122	179.452	993.837	1086.36	993.97	6.56832	0.000808357	up
hsa_circ_0125048	57.8677	63.5818	55.5788	303.992	309.359	325.133	6.56805	0.000700211	up
hsa_circ_0140194	4.71718	2.52774	3.60432	13.9021	17.8218	25.6813	6.54641	0.00918512	up
hsa_circ_0096532	76.6384	75.7408	57.3658	360.951	377.895	358.967	6.53154	0.000939705	up
hsa-circRNA13222-8	1417.08	1259.55	1433.14	7004.81	7936.08	6746.93	6.52536	0.00160407	up
hsa_circ_0085424	69.2274	73.8189	52.704	246.91	384.065	416.361	6.52492	0.00299743	up
hsa_circ_0132346	22.5379	14.4982	20.9414	100.367	120.317	83.0173	6.52357	0.00629137	up
hsa_circ_0024298	978.298	771.333	781.837	3890.61	5194.5	4276.61	6.52346	0.00150414	up
hsa_circ_0126157	16.5677	13.5102	8.7457	72.7999	55.7608	70.5515	6.52054	0.00531361	up
hsa-circRNA14213-15	274.588	523.253	342.043	1389.02	2093.68	2468.52	6.51722	0.00943524	up
hsa_circ_0046921	44.0604	33.3143	41.5566	215.07	198.63	207.221	6.503	0.0023733	up
hsa_circ_0060882	62.2147	54.3434	52.7428	329.037	271.234	289.368	6.4985	0.00177533	up
hsa_circ_0094992	162.02	167.554	122.259	734.827	926.131	705.957	6.49747	0.00180511	up
hsa_circ_0128184	19.4111	16.3893	25.8778	106.013	86.3337	129.985	6.49381	0.00756575	up
hsa_circ_0124494	169.9	204.016	204.795	1007.74	1105.56	914.798	6.4798	0.00251487	up
hsa_circ_0124491	151.421	154.274	143.036	681.912	898.78	781.308	6.47581	0.000914124	up
hsa_circ_0035125	47.248	62.6919	45.3706	232.538	266.371	310.49	6.47273	0.00183079	up
hsa_circ_0011177	206.868	198.513	183.169	974.013	1083.97	1017.4	6.46816	0.000568764	up
hsa_circ_0051540	37.5745	33.5569	19.1992	143.883	134.079	178.668	6.46182	0.00532376	up
hsa_circ_0116496	47.9486	63.0352	29.1757	178.963	225.122	310.337	6.45276	0.00867678	up
hsa_circ_0095399	171.809	164.206	115.297	680.551	844.38	797.049	6.4379	0.00138663	up
hsa_circ_0060880	198.531	184.227	193.698	921.356	985.784	1098.1	6.43747	0.000872667	up
hsa_circ_0023526	65.1278	59.0818	57.8532	287.51	321.816	337.595	6.43039	0.000568764	up
hsa_circ_0105709	255.548	221.051	211.317	1114.48	1112.82	1347.04	6.42482	0.000916598	up
hsa_circ_0042338	206.831	167.047	171.774	960.542	905.743	953.823	6.42284	0.00123535	up
hsa_circ_0010015	84.3963	74.795	48.3043	318.94	338.225	395.12	6.42226	0.00275395	up
hsa-circRNA2694-20	17.3454	16.4185	9.46479	71.0721	73.2302	72.3891	6.42214	0.00376087	up
hsa_circ_0131529	16.9404	15.209	9.48683	73.1378	74.4354	62.7493	6.42189	0.00403249	up
hsa_circ_0025006	1039.88	1042.89	735.587	4756.11	4389.32	5333.73	6.41914	0.00158506	up
hsa_circ_0107789	1314.04	1141.65	1334.9	6761.69	6450.94	6406.77	6.41863	0.00176343	up
hsa_circ_0049061	1747.49	1923.2	1382.67	8228	9785.42	8001.66	6.40473	0.00149432	up
hsa_circ_0021960	1267.93	1114.36	1070.2	5460.86	5618.06	6827.35	6.40285	0.00088685	up
hsa_circ_0019065	416.768	495.828	286.914	1831.83	2431.66	1840.31	6.39884	0.00372075	up
hsa_circ_0025750	65.6031	72.8265	68.9441	328.518	340.75	406.363	6.39637	0.0011567	up
hsa-circRNA11762-6	49.6212	40.618	57.0935	234.597	310.238	218.314	6.39601	0.00501885	up
hsa_circ_0001485	66.1512	78.5392	38.5551	335.438	277.18	297.367	6.39521	0.00655473	up
hsa_circ_0023971	254.662	249.28	192.276	1106.2	1164.11	1302.88	6.38635	0.00078557	up
hsa_circ_0011321	94.3677	103.432	50.0425	323.949	450.255	460.047	6.3852	0.00666228	up
hsa_circ_0010022	713.974	548.438	741.875	3461.4	3204.13	3586.45	6.37817	0.00302739	up
hsa_circ_0060857	40.9774	46.2106	26.0615	198.398	185.15	183.261	6.37014	0.00363335	up
hsa_circ_0019870	466.123	446.123	459.703	2241.06	2569.07	2263.55	6.36889	0.00102439	up
hsa_circ_0090498	179.019	188.701	157.516	938.64	801.714	963.088	6.36693	0.00132387	up
hsa-circRNA5147-33	141.761	172.126	123.891	738.408	677.79	821.375	6.36352	0.00162447	up
hsa_circ_0051542	94.035	82.0273	67.0705	466.051	331.252	452.202	6.34721	0.00342457	up
hsa_circ_0043738	2316.5	2059.77	2436.9	11170.4	10977.9	12793	6.34682	0.00169219	up
hsa_circ_0120712	38.5343	50.8112	42.4412	163.672	248.387	275.062	6.34133	0.00376322	up
hsa_circ_0134261	65.0229	54.8051	81.0563	352.022	342.274	322.505	6.34068	0.00469162	up
hsa_circ_0058197	204.615	206.451	183.5	967.228	1058.79	1013.87	6.33157	0.000568764	up
hsa_circ_0099479	170.764	230.454	132.081	709.099	1030.94	951.739	6.33014	0.00380934	up
hsa_circ_0048854	2078.47	1933.25	1678.12	9148.06	11291.4	8722.93	6.32648	0.00136561	up
hsa_circ_0011168	190.285	134.035	173.597	970.275	766.029	795.953	6.32636	0.00458719	up
hsa-circRNA12675-1	168.052	184.297	132.077	595.865	1064.19	861.487	6.32524	0.00367217	up
hsa_circ_0072390	122.785	94.194	101.595	483.01	601.203	539.733	6.32275	0.00136228	up
hsa_circ_0094971	578.732	625.052	636.611	3257.11	2879.37	3270.91	6.31992	0.00174369	up
hsa_circ_0135293	7.32956	11.6777	5.95055	35.4818	47.217	40.4945	6.3198	0.00578328	up
hsa-circRNA14157-117	35.5323	34.0305	17.6439	101.893	154.065	180.904	6.31834	0.00873405	up
hsa-circRNA3239-4	21.9839	24.5653	26.4967	138.527	122.593	112.073	6.31677	0.00334946	up
hsa_circ_0061603	33.1706	36.7637	20.6418	166.697	135.737	147.94	6.31633	0.0046803	up
hsa-circRNA971	54.2185	43.4303	35.1211	283.8	172.668	224.293	6.31506	0.00660934	up
hsa_circ_0097547	35.1395	48.4071	33.454	169.99	208.226	213.638	6.31484	0.00202356	up
hsa-circRNA1506-21	10.8479	17.8672	17.7272	81.0923	68.9192	81.6625	6.31394	0.00794949	up
hsa-circRNA840-7	778.907	839.12	764.517	3983.88	3719.92	4478.28	6.31373	0.00109457	up
hsa_circ_0102111	47.7362	35.5362	37.3603	172.882	231.692	210.097	6.31323	0.00164434	up
hsa_circ_0094358	29.8958	43.3853	20.4163	154.158	149.119	152.345	6.30473	0.00622513	up
hsa_circ_0043235	41.8895	37.7352	33.1176	165.973	181.117	229.635	6.29857	0.0011543	up
hsa_circ_0105714	394.159	354.138	285.456	1378.16	1862.15	2033.43	6.28427	0.00155926	up
hsa_circ_0074754	248.394	160.766	147.623	948.513	874.525	929.344	6.28109	0.00343736	up
hsa_circ_0106703	128.802	155.849	88.7959	450.379	651.793	791.854	6.27536	0.00543124	up
hsa_circ_0105708	264.385	229.24	278.225	1236.39	1162.46	1529.42	6.27451	0.00244961	up
hsa_circ_0046327	755.019	738.212	683.519	3760.87	3468.05	3804.93	6.27304	0.000892384	up
hsa_circ_0091581	37.857	29.6329	19.8219	148.339	117.208	166.16	6.26747	0.00573689	up
hsa_circ_0082550	25.0601	19.92	12.2624	85.3928	98.9957	94.0394	6.26663	0.00471633	up
hsa-circRNA4585-19	76.9158	59.8145	59.6679	326.109	298.39	366.133	6.2653	0.00156807	up
hsa_circ_0114109	151.748	152.047	121.21	646.907	647.235	866.751	6.26498	0.00138565	up
hsa-circRNA11809-4	93.7471	72.6332	57.4646	370.974	320.225	427.334	6.26457	0.00298806	up
hsa_circ_0091731	1213.79	1077.15	1005.63	4821.53	5649.84	6247.22	6.25966	0.000681589	up
hsa_circ_0077958	95.5687	78.5503	93.564	430.429	469.442	448.621	6.25362	0.00155846	up
hsa_circ_0125057	162.531	139.355	136.832	707.049	736.804	764.32	6.24421	0.000670239	up
hsa-circRNA13537-1	348.888	236.631	297.867	1398.63	1497.44	1507.83	6.24323	0.00250568	up
hsa_circ_0062058	291.059	235.392	205.026	1217.15	1174.71	1260.24	6.24094	0.00125278	up
hsa_circ_0055399	268.298	238.283	240.817	1176.67	1490.04	1125.88	6.23999	0.00169518	up
hsa_circ_0100083	57.8451	79.1248	62.7278	216.906	424.326	399.878	6.23956	0.00712324	up
hsa-circRNA7686-3	6.30325	7.7017	3.6945	22.8585	32.1663	31.1532	6.23183	0.00638103	up
hsa_circ_0051429	33.9436	41.874	35.3839	204.048	151.487	207.723	6.23107	0.00344209	up
hsa_circ_0102881	24.1464	17.1783	13.393	94.2898	80.5445	93.055	6.22363	0.00393884	up
hsa-circRNA734-2	218.037	151.322	193.422	813.641	854.467	1166.04	6.22064	0.00369998	up
hsa_circ_0096692	286.566	269.24	223.956	1272.33	1260.7	1367.63	6.21946	0.000670782	up
hsa_circ_0106837	1080.51	1170.68	973.467	4859.14	5178.45	6204.16	6.2166	0.000872667	up
hsa_circ_0098256	53.3141	83.392	50.6503	212.988	409.374	326.533	6.21087	0.00810907	up
hsa_circ_0071341	10.0543	16.3584	9.01356	46.7304	72.3887	55.3564	6.20893	0.00663396	up
hsa-circRNA11470-10	96.5052	77.0525	69.007	500.497	347.017	373.118	6.20855	0.00468471	up
hsa_circ_0024299	200.266	181.341	136.549	814.506	945.532	811.261	6.20365	0.0014612	up
hsa_circ_0050966	59.9383	62.574	49.3615	273.281	292.58	291.276	6.20048	0.000621149	up
hsa_circ_0125060	69.3577	56.9768	57.5992	300.069	301.715	316.268	6.20043	0.000923173	up
hsa_circ_0000403	692.903	699.395	753.609	3834.52	3675.07	3257.05	6.19851	0.00221943	up
hsa_circ_0071224	61.009	66.1242	52.3975	255.874	288.613	359.393	6.19654	0.0012388	up
hsa_circ_0133002	81.1961	84.478	78.3322	341.768	438.236	450.399	6.1964	0.000882317	up
hsa_circ_0083083	693.916	575.872	508.346	2734.56	3129.72	2973.85	6.19213	0.000882317	up
hsa-circRNA14157-65	374.188	383.252	328.887	1865.46	1781.72	1767.85	6.18042	0.000919032	up
hsa_circ_0056119	52.697	67.949	57.6114	272.382	296.577	318.118	6.1803	0.00153082	up
hsa_circ_0046938	44.8275	37.3034	28.9462	160.61	192.132	194.576	6.17153	0.00142607	up
hsa-circRNA6167-12	74.1218	57.7895	72.372	289.104	368.842	359.915	6.16752	0.00210181	up
hsa-circRNA11434-21	261.425	178.864	154.994	759.096	932.46	1265.83	6.16462	0.00477916	up
hsa_circ_0024293	827.086	716.249	570.138	3445.74	3918.55	3083.11	6.15841	0.00201139	up
hsa_circ_0097861	157.934	145.524	91.1959	705.447	655.526	558.305	6.15717	0.00467847	up
hsa_circ_0112565	21.6636	21.7091	14.1147	88.3208	100.139	92.4364	6.15683	0.00191396	up
hsa-circRNA11470-74	764.803	647.987	768.888	3789.05	3273.05	3781.52	6.15542	0.00225989	up
hsa_circ_0102115	10.2425	11.5497	5.06254	34.5838	47.4158	44.7688	6.14718	0.00895416	up
hsa_circ_0127589	103.836	87.3273	87.9094	446.442	449.322	486.73	6.14554	0.000861343	up
hsa-circRNA173-13	366.175	260.132	278.83	1122.2	1683.42	1721.87	6.14536	0.00312866	up
hsa_circ_0008224	95.4253	70.0656	80.1869	420.514	388.715	401.692	6.14533	0.0021248	up
hsa_circ_0043253	196.517	178.9	140.365	675.466	889.397	1005.53	6.14437	0.00167235	up
hsa_circ_0027758	9.62505	15.6034	10.5854	66.5726	61.1488	47.6322	6.13695	0.00719115	up
hsa_circ_0062068	448.995	415.005	450.9	2344.41	2009.17	2172.51	6.13403	0.00190391	up
hsa_circ_0070700	303.865	290.353	265.558	1388.08	1364.95	1505.86	6.13362	0.000621149	up
hsa_circ_0043700	250.603	294.095	188.21	995.837	1248.93	1350.89	6.1227	0.00202878	up
hsa_circ_0056014	911.957	930.725	790.107	4526.24	4687.52	3826.91	6.12186	0.00160407	up
hsa_circ_0043702	164.685	170.675	165.676	686.444	800.476	1025.38	6.12049	0.00169318	up
hsa_circ_0057225	23.3669	18.6096	15.8869	96.5037	86.0804	100.593	6.11993	0.00178493	up
hsa_circ_0105018	117.006	149.856	86.6642	445.707	633.898	649.342	6.11609	0.00379928	up
hsa_circ_0042341	73.8461	66.1943	63.2982	359.445	317.028	327.6	6.11475	0.00135419	up
hsa_circ_0125050	143.298	180.446	144.901	745.007	736.335	822.166	6.11008	0.00140041	up
hsa-circRNA15693-4	4.79165	4.23411	3.69924	17.7709	22.7302	22.2495	6.09947	0.000808357	up
hsa_circ_0039721	499.931	461.282	382.017	1988.32	2288.66	2317.15	6.09848	0.000609408	up
hsa_circ_0133744	567.681	549.876	411.207	2354.97	2855.64	2283.85	6.09785	0.00160424	up
hsa_circ_0043240	221.317	227.971	203.933	1026.33	994.359	1201.34	6.08937	0.000882317	up
hsa-circRNA3398	57.9417	32.346	47.7144	229.843	213.611	216.449	6.08393	0.00642649	up
hsa_circ_0094993	204.666	182.912	142.124	790.709	903.525	884.582	6.08295	0.000985035	up
hsa-circRNA11480-14	196.039	220.139	201.489	854.304	1042.15	1158.52	6.08023	0.00119578	up
hsa_circ_0021356	22.0081	16.135	8.82382	69.8577	68.8072	77.2107	6.07724	0.0094927	up
hsa-circRNA11372-9	161.005	125.406	136.035	747.803	673.19	644.205	6.07083	0.00221963	up
hsa_circ_0087664	39.5356	32.2081	23.5993	155.997	151.643	149.798	6.06827	0.00248379	up
hsa_circ_0114107	289.097	212.537	198.434	1251.59	1010.79	1134.68	6.06503	0.00293712	up
hsa_circ_0046367	1091.06	1027.79	1140.21	5410.84	5192.6	5343.82	6.05974	0.00149918	up
hsa_circ_0114110	59.1083	58.6676	37.8271	255.117	220.299	273.646	6.05663	0.00289722	up
hsa_circ_0013272	6.63234	6.70508	5.05835	40.3886	25.6682	25.4356	6.05629	0.00723241	up
hsa-circRNA13098	17.3942	24.6658	13.41	80.0279	92.8666	90.6055	6.05308	0.00383815	up
hsa-circRNA15186-18	25.7538	22.0166	12.622	90.9767	99.2874	92.622	6.05071	0.00536194	up
hsa_circ_0005382	1131.51	900.571	894.729	5142.72	4338.31	4771.9	6.04849	0.00194099	up
hsa_circ_0084870	31.3509	33.425	37.8245	114.153	173.504	232.979	6.04237	0.00695204	up
hsa-circRNA11372-1	217.487	213.312	193.469	1150.21	929.92	975.797	6.04008	0.00201019	up
hsa_circ_0113258	15.0247	10.1519	8.41931	48.078	49.6079	62.581	6.03908	0.00379642	up
hsa_circ_0006244	239.673	216.946	190.516	1025.13	1042.21	1076.74	6.03738	0.000625747	up
hsa_circ_0027746	45.2468	42.6366	55.9384	201.107	312.75	199.026	6.03511	0.00646592	up
hsa_circ_0125078	56.8094	76.1369	50.8437	260.374	307.732	318.297	6.03463	0.00194912	up
hsa_circ_0125051	210.224	189.17	138.72	827.638	821.71	939.952	6.03297	0.00152371	up
hsa_circ_0110719	91.4493	86.23	78.1878	405.285	389.406	452.658	6.03281	0.000749543	up
hsa_circ_0000042	486.34	387	393.846	2039.07	2187.08	1922.34	6.02908	0.00140766	up
hsa_circ_0061596	10.857	10.2317	6.80185	47.4169	35.1788	52.374	6.0286	0.00489203	up
hsa_circ_0071300	26.3423	41.6688	37.1204	126.683	188.211	197.519	6.0279	0.00663396	up
hsa_circ_0009311	55.951	49.3089	45.2011	272.907	243.973	216.413	6.02727	0.00219199	up
hsa_circ_0046359	2485.4	2259.41	2754.8	11171.8	12420.7	12864.2	6.02454	0.00181145	up
hsa_circ_0039723	215.961	201.636	183.946	862.369	1069.63	995.166	6.01077	0.000613263	up
hsa-circRNA11434-5	164.018	154.677	170.891	942.697	680.512	772.247	6.00496	0.00397212	up
hsa_circ_0017432	68.7963	59.41	62.6703	309.704	289.82	324.161	5.99309	0.0012009	up
hsa_circ_0046920	29.4866	19.0221	18.1203	100.508	116.754	98.1892	5.98913	0.00346961	up
hsa_circ_0055393	393.128	333.238	315.447	1591.93	1662.32	1765.99	5.98418	0.000685709	up
hsa-circRNA7015	41.1924	35.6422	20.5612	136.166	172.437	145.084	5.97994	0.00552405	up
hsa_circ_0114153	52.0693	42.878	42.5079	247.142	158.09	273.495	5.97547	0.00645105	up
hsa_circ_0106688	552.294	721.226	564.242	2640.42	2905.36	3293.66	5.97241	0.00162848	up
hsa_circ_0137482	71.1143	64.2793	46.3201	307.115	263.079	293.911	5.96764	0.00237416	up
hsa_circ_0134262	79.6635	73.7549	89.8789	404.578	402.846	363.363	5.9675	0.00267022	up
hsa_circ_0091323	361.375	401.103	285.028	1493.17	1708.28	1809.95	5.96045	0.00104863	up
hsa_circ_0067038	187.437	201.196	186.241	979.244	873.098	917.058	5.95847	0.00141559	up
hsa_circ_0019868	577.791	563.077	515.552	2199.59	2771.19	3071.36	5.95813	0.000921152	up
hsa-circRNA1628-5	1288.46	1136.99	835.909	5197.02	4752.77	5528.53	5.95628	0.00192808	up
hsa_circ_0091728	1382.46	1185.96	1374.45	5568.92	6157.37	7326.15	5.95568	0.00167168	up
hsa_circ_0024297	998.388	931.719	810.438	4169.77	4879.71	4128.25	5.95466	0.00092166	up
hsa-circRNA7329-3	97.7792	105.491	95.0082	524.919	432.502	479.945	5.95045	0.00185212	up
hsa_circ_0114118	71.7006	75.2482	66.3436	369.114	297.574	362.268	5.95009	0.00182222	up
hsa_circ_0043724	1175.67	1057.88	1097.91	5383.16	5323.89	5285.57	5.94598	0.00105633	up
hsa_circ_0001552	33.6161	42.4795	32.0478	149.783	215.18	157.394	5.94442	0.00285963	up
hsa-circRNA173-18	182.723	142.304	163.448	661.116	794.289	888.928	5.92624	0.00171295	up
hsa_circ_0071190	36.5808	35.7106	22.543	139.506	129.006	179.26	5.9212	0.00368267	up
hsa_circ_0016391	102.766	98.9106	90.7091	514.485	400.936	489.116	5.91889	0.00205069	up
hsa_circ_0055394	439.07	312.512	323.411	1545.82	1815.35	1730.37	5.91882	0.00168015	up
hsa_circ_0116326	409.254	451.383	499.905	2162.89	2030.66	2299.83	5.91809	0.00241888	up
hsa_circ_0117955	155.051	124.486	157.376	618.913	544.573	982.893	5.91226	0.00706975	up
hsa_circ_0120708	408.43	385.944	318.221	1652.91	1751.02	1890.09	5.91223	0.000609408	up
hsa_circ_0125052	148.752	139.408	93.3811	558.684	596.107	630.969	5.90243	0.00190813	up
hsa_circ_0133745	1144.5	1197.6	941.478	5007.28	5501.81	5082.74	5.90231	0.000791726	up
hsa_circ_0036420	43.9748	33.8205	30.0418	146.342	191.208	172.817	5.89727	0.00162963	up
hsa-circRNA15868-19	8.58983	6.20791	8.53293	29.986	48.7032	33.602	5.89031	0.00615903	up
hsa_circ_0046915	42.4895	26.3669	29.3579	143.783	183.74	134.253	5.89012	0.00482705	up
hsa-circRNA1541-14	1015.46	963.124	824.182	3904.65	5523.73	4020.32	5.88531	0.0019592	up
hsa_circ_0025326	3602.82	2605.07	3177.85	13807.9	15225.4	15238.8	5.88235	0.00203534	up
hsa_circ_0125567	26.8751	42.1957	39.313	116.803	209.549	195.227	5.87817	0.00958093	up
hsa_circ_0024271	65.9402	76.1803	44.6799	270.641	296.909	298.969	5.87553	0.00261945	up
hsa_circ_0040560	34.3398	23.3918	27.6371	125.356	137.588	137.131	5.86637	0.00225772	up
hsa_circ_0001318	41.0163	47.5452	50.5423	213.655	241.589	203.112	5.86323	0.00271693	up
hsa-circRNA13222-1	1506.06	1268.26	1291.88	6355.9	6253.52	6582.53	5.857	0.000978577	up
hsa_circ_0023670	103.025	108.152	113.273	480.755	542.773	511.952	5.85361	0.00130707	up
hsa_circ_0071233	37.5546	67.0735	34.6356	159.793	239.94	240.704	5.85243	0.00883687	up
hsa_circ_0071342	67.2096	59.0597	29.7062	215.5	243.197	237.656	5.84965	0.00821869	up
hsa_circ_0134252	22.5396	17.3494	12.8568	85.1545	77.5294	80.1274	5.84204	0.00339983	up
hsa_circ_0006335	541.035	502.768	411.689	2174.05	2113.91	2556.2	5.83621	0.00101413	up
hsa_circ_0113009	239.616	216.891	131.971	932.242	971.675	794.144	5.83586	0.00497883	up
hsa_circ_0051428	59.7055	64.8256	65.2099	299.504	307.082	286.129	5.82437	0.0015377	up
hsa_circ_0137897	31.2574	28.1857	21.2532	109.679	147.207	120.713	5.82105	0.00182781	up
hsa_circ_0043251	25.2645	28.3512	20.5721	108.02	91.278	155.455	5.81976	0.00469778	up
hsa_circ_0064403	3.90559	6.30166	4.04382	22.8633	21.0713	21.4506	5.81629	0.0048442	up
hsa-circRNA15792-3	57.8278	57.0536	28.5443	195.714	217.362	229.593	5.81401	0.00664182	up
hsa_circ_0125082	49.6535	49.8167	38.8199	219.878	221.884	203.696	5.80993	0.00119137	up
hsa_circ_0005720	17.6084	15.7952	20.0752	85.4546	72.5167	93.1433	5.80774	0.00357799	up
hsa_circ_0072532	32.609	38.3978	27.1211	135.567	138.444	186.959	5.80687	0.00218189	up
hsa-circRNA1541-16	557.714	549.387	370.875	2247.81	2546.77	2051.06	5.80681	0.00255585	up
hsa_circ_0043262	53.0079	54.8081	43.0646	236.144	228.855	238.473	5.80084	0.000891952	up
hsa_circ_0067665	137.698	126.47	99.3891	534.53	564.317	590.808	5.80003	0.000867245	up
hsa-circRNA14157-89	151.265	133.381	117.378	602.99	624.004	647.221	5.79754	0.000646311	up
hsa_circ_0016411	50.9417	48.1523	27.5369	195.789	153.991	230.321	5.79702	0.00715763	up
hsa_circ_0010023	489.809	423.488	492.935	2169.39	2185.56	2212.41	5.79301	0.00157881	up
hsa_circ_0131369	652.608	526.406	444.822	2382.59	2410.66	2722.59	5.78811	0.0013403	up
hsa_circ_0094969	420.68	382.28	232.929	1602.06	1581.29	1512.04	5.78673	0.00404878	up
hsa-circRNA13222-18	1476.85	1189.92	1178.26	6274.41	5806.25	5807.27	5.78516	0.00154965	up
hsa-circRNA11762-8	66.6927	43.9842	50.5666	234.382	261.741	246.554	5.78128	0.00260626	up
hsa_circ_0127807	18.236	10.7472	10.1168	59.1458	59.7375	57.1692	5.77948	0.0051058	up
hsa_circ_0109723	45.8523	37.2814	29.747	156.952	163.929	200.896	5.77519	0.00187254	up
hsa_circ_0088093	45.1877	36.0988	18.7171	134.021	137.601	167.894	5.77069	0.00997311	up
hsa_circ_0137928	54.9833	61.5714	60.999	275.016	211.496	359.787	5.76933	0.00539623	up
hsa_circ_0057329	59.8933	61.7584	43.6318	225.708	284.236	254.602	5.76683	0.00134873	up
hsa_circ_0055982	253.718	236.175	176.56	1057.24	1051.87	962.145	5.76544	0.00169574	up
hsa_circ_0079190	26.2	27.9798	24.283	112.823	129.917	122.799	5.76508	0.000614336	up
hsa-circRNA13990-41	27.0479	30.3845	16.4267	108.401	98.6254	127.622	5.76419	0.00502521	up
hsa_circ_0135146	8.63275	8.76929	4.06773	29.0644	33.6485	31.8225	5.76412	0.00853858	up
hsa_circ_0043730	2881.95	2452.07	2299.9	10912.1	12663.6	11851.8	5.75849	0.000733976	up
hsa-circRNA4519-6	120.515	115.554	92.7802	518.515	539.68	465.165	5.75805	0.00136547	up
hsa_circ_0098491	45.4952	37.907	24.3122	137.259	170.424	180.343	5.75556	0.00397834	up
hsa_circ_0000963	1762.57	2314.74	1597.92	9752.54	7580.95	8837.94	5.74818	0.00369998	up
hsa_circ_0016397	52.8644	38.0395	47.0058	199.285	215.438	220.487	5.7466	0.00218721	up
hsa-circRNA7252-2	40.048	35.8414	23.4724	173.305	135.614	143.48	5.74552	0.0049859	up
hsa_circ_0006239	16.2773	9.80203	9.8748	62.3711	51.0167	49.51	5.74366	0.00639921	up
hsa_circ_0039720	962.74	733.735	937.179	3770.13	4505.94	3886.32	5.73857	0.00266557	up
hsa-circRNA14513-22	576.805	467.644	469.289	2265.09	2416.75	2305.48	5.73806	0.00103888	up
hsa-circRNA12216	12.1506	11.4584	15.7867	58.5949	62.8462	59.4909	5.73755	0.00406901	up
hsa_circ_0046373	2757.64	1998.17	2832.66	11702.4	11651.1	11408	5.73715	0.00398305	up
hsa_circ_0096689	754.22	818.884	613.355	3548.62	3212.52	3283.86	5.72119	0.00153609	up
hsa_circ_0071166	106.78	115.385	71.8924	464.243	453.113	415.985	5.72053	0.0029398	up
hsa_circ_0078816	1760.49	1470.76	1299.89	6775.94	6626.65	7404.86	5.72048	0.00105393	up
hsa_circ_0006891	144.901	109.194	107.618	576.233	449.799	647.813	5.71704	0.00360699	up
hsa_circ_0071313	22.8524	35.5641	20.6628	115.951	122.61	116.447	5.71654	0.00446258	up
hsa-circRNA2539-6	90.1561	87.4408	66.1954	394.66	369.858	352.277	5.7157	0.00166064	up
hsa_circ_0024737	142.393	116.822	101.49	521.035	582.912	547.293	5.71415	0.00109353	up
hsa_circ_0137685	401.186	351.099	352.226	1616.83	1731.87	1743.19	5.71273	0.000681589	up
hsa_circ_0024281	232.017	226.43	213.37	1051.13	1017.03	1031.63	5.71273	0.000877105	up
hsa_circ_0043731	3012.33	2787.3	2534.27	11794	12590.5	14095.9	5.71242	0.000568764	up
hsa_circ_0124833	8.78895	6.4018	4.93482	32.733	26.2166	31.7712	5.70903	0.00475041	up
hsa-circRNA1541-9	824.274	753.716	605.074	2992.41	3979.23	3097.72	5.70767	0.00170659	up
hsa_circ_0042337	99.8191	93.0686	89.9377	444.158	417.144	442.276	5.70672	0.00095148	up
hsa_circ_0043762	11.8468	9.90928	6.02707	35.0604	37.2886	53.052	5.7058	0.00673226	up
hsa_circ_0009994	312.959	302.969	249	851.508	1665.92	1630.97	5.70518	0.00633666	up
hsa-circRNA7603-11	536.583	442.455	460.333	2299.81	2282.74	2038.62	5.70387	0.00170331	up
hsa-circRNA14207-1	789.505	721.747	616.465	3394.76	2693.5	3753.43	5.69949	0.00245113	up
hsa_circ_0096472	154.754	115.141	113.799	603.679	482.954	678.216	5.69583	0.00337381	up
hsa_circ_0071408	30.7099	20.4134	18.7634	90.7593	118.566	106.519	5.69454	0.00320734	up
hsa-circRNA11434-85	139.685	164.12	92.613	503.14	597.023	688.58	5.694	0.00370911	up
hsa_circ_0082895	102.688	103.841	84.7402	409.5	498.783	430.539	5.69202	0.000872667	up
hsa_circ_0043701	141.491	173.812	102.937	652.61	628.535	600.581	5.69193	0.00330405	up
hsa_circ_0112080	19.5242	18.7292	15.8381	86.4962	65.8679	98.7156	5.68794	0.00316457	up
hsa_circ_0137481	80.9243	82.9413	58.9078	370.68	322.192	320.09	5.67966	0.00236852	up
hsa_circ_0095439	100.15	78.7821	57.9209	289.602	413.2	369.174	5.67929	0.00341521	up
hsa_circ_0121690	17.5909	16.4409	14.3165	70.7138	79.3246	71.3454	5.67907	0.000717353	up
hsa_circ_0121025	8.56882	14.3759	10.146	46.0746	40.7721	64.304	5.67899	0.00804151	up
hsa_circ_0067127	152.12	138.445	92.8515	534.956	646.15	546.147	5.67681	0.00266885	up
hsa_circ_0079480	24.7182	26.5067	20.6719	82.0461	101.789	156.299	5.67356	0.00491964	up
hsa_circ_0074914	684.583	642.206	621.934	2791.94	3435.8	2738.87	5.66789	0.00132889	up
hsa-circRNA5555-2	154.11	176.327	126.67	655.464	718.149	701.448	5.66473	0.00109353	up
hsa_circ_0033580	34.6336	45.5656	46.7018	219.373	176.157	182.738	5.66259	0.00564484	up
hsa-circRNA11733-54	2337.89	1833.82	2269.44	8802.65	8952.94	11823.6	5.66168	0.00291618	up
hsa_circ_0121762	175.637	139.966	150.209	579.868	722.656	843.74	5.66124	0.00184462	up
hsa_circ_0094980	298.554	265.771	294.837	1127.1	1296.59	1532.47	5.66086	0.00154315	up
hsa-circRNA16206-19	251.401	292.874	301.577	1159.39	1555.93	1177.49	5.65948	0.00322027	up
hsa_circ_0043725	951.156	857.726	862.666	3942.71	3876.26	4401.74	5.65801	0.000885078	up
hsa_circ_0041057	18.3417	21.5248	24.8471	79.1002	111.069	106.63	5.65631	0.00420681	up
hsa_circ_0046333	337.663	334.633	322.458	1574.92	1439.4	1532.58	5.65345	0.00117144	up
hsa-circRNA11470-63	1762.67	1806.77	1917.97	8624.58	7626	8844.61	5.65111	0.00193712	up
hsa_circ_0046336	2280.71	1978.1	2091.68	10199.4	9096.38	9667.24	5.64735	0.00160097	up
hsa_circ_0008590	30.8016	31.6296	29.5648	137.167	143.658	138.453	5.6409	0.000777403	up
hsa_circ_0105712	322.334	276.322	312.651	1265.22	1502.54	1385.56	5.63828	0.0013414	up
hsa_circ_0089782	38.9059	34.324	26.0049	138.93	163.884	144.216	5.63759	0.00154554	up
hsa_circ_0016392	117.946	120.633	112.675	538.56	501.415	560.975	5.63638	0.00100743	up
hsa_circ_0080947	13.842	11.9502	8.31764	60.4529	40.7767	52.6336	5.63258	0.00634232	up
hsa_circ_0071198	45.5001	63.0908	37.1339	189.16	211.806	250.878	5.63242	0.00357161	up
hsa_circ_0125564	59.8465	65.2781	48.0362	248.975	265.023	267.981	5.63107	0.000917179	up
hsa_circ_0116147	520.665	509.052	405.148	2460.28	2024.99	2030.48	5.63064	0.00239247	up
hsa_circ_0091730	80.0909	81.1037	63.1272	295.239	355.574	367.648	5.62901	0.000739839	up
hsa_circ_0010020	357.936	309.286	289.622	1396.53	1398.97	1544.62	5.62896	0.000773477	up
hsa_circ_0123931	21.0346	30.0768	15.8583	88.8942	100.493	105.627	5.62758	0.00466997	up
hsa_circ_0091732	715.534	567.786	543.362	2626.33	2856.78	2767.04	5.62748	0.00105831	up
hsa_circ_0125064	163.588	161.893	126.539	600.898	761.564	686.591	5.62171	0.00091727	up
hsa-circRNA16206-14	268.346	322.126	219.369	929.747	1492.89	1277.24	5.61638	0.00329518	up
hsa_circ_0053155	8.93452	8.4309	4.30864	26.2738	36.6107	31.5285	5.61544	0.00792218	up
hsa-circRNA11470-6	517.633	621.763	566.992	2699.52	2700.53	2337.27	5.61404	0.00239928	up
hsa-circRNA11480-12	182.563	194.542	146.647	565.068	852.54	1009.11	5.6133	0.00370385	up
hsa-circRNA4456-27	154.442	165.566	98.6404	492.827	671.219	711.032	5.6116	0.00369452	up
hsa_circ_0070701	99.2166	96.1651	81.8545	434.341	404.152	414.051	5.60785	0.00102439	up
hsa-circRNA11470-22	1187.24	942.928	1204.31	4879.93	5136.3	4998.11	5.60496	0.00241888	up
hsa_circ_0084128	99.9912	75.4253	87.2265	288.902	428.592	493.358	5.60373	0.00421102	up
hsa_circ_0092532	1477.07	1209.95	1089.96	4902.71	6724.25	5484.09	5.60277	0.00168993	up
hsa_circ_0121716	245.016	222.107	209.858	652.104	1202.86	1344.18	5.59289	0.00675535	up
hsa_circ_0046341	364.895	476.43	295.933	1532.6	1654.37	1873.24	5.59285	0.00250153	up
hsa_circ_0102125	24.7145	39.2124	26.6016	150.213	99.5246	159.162	5.59242	0.00956761	up
hsa-circRNA11470-51	1746.15	1808.6	1766.51	7173.89	8480.49	8456.36	5.59081	0.000813049	up
hsa_circ_0125109	232.361	283.81	238.91	1059.72	1143.79	1197.9	5.58957	0.00119291	up
hsa-circRNA9277-1	618.942	602.206	623.389	2590.96	3042.94	2708.65	5.58451	0.00112225	up
hsa_circ_0109298	124.237	110.184	81.7447	318.865	589.331	546.357	5.58133	0.005845	up
hsa_circ_0125821	47.5956	28.3651	30.0672	112.501	158.99	207.691	5.57659	0.00797734	up
hsa-circRNA11434-76	215.459	281.633	180.542	684.958	983.757	1487.24	5.57575	0.0093159	up
hsa_circ_0046353	1391.43	1335.2	1283.62	5490.66	6138.14	6468.34	5.57447	0.000568764	up
hsa_circ_0113010	365.432	360.642	332.346	1548.93	1625.25	1587.3	5.57074	0.000614336	up
hsa_circ_0087308	4.31426	4.01952	3.64895	15.4968	19.781	18.8226	5.56983	0.000646311	up
hsa-circRNA15051-5	24.4499	22.2732	29.2478	79.0397	123.633	148.476	5.56794	0.00728628	up
hsa-circRNA10826-3	256.06	203.042	214.507	986.443	976.244	1054.33	5.5669	0.00127308	up
hsa-circRNA13774-3	310.437	347.962	367.585	1622.79	1536.61	1449.24	5.56633	0.0026967	up
hsa_circ_0096546	24.5219	16.0266	14.3545	87.2629	71.7915	81.8899	5.56481	0.00490716	up
hsa_circ_0006894	229.356	285.249	245.682	1283.53	1010.75	1123.49	5.55952	0.00333912	up
hsa-circRNA11434-39	44.814	45.0907	25.533	171.739	158.907	171.292	5.55796	0.00464147	up
hsa_circ_0025327	3863.37	3598.29	3418.91	15570.5	17076.2	16187.3	5.557	0.000614336	up
hsa_circ_0079900	101.731	82.6448	96.9879	395.136	462.421	403.877	5.55584	0.00185212	up
hsa_circ_0114117	110.826	107.177	97.0046	530.185	355.555	552.338	5.55311	0.00486104	up
hsa_circ_0094963	275.007	226.283	224.844	1040.49	1230.15	984.772	5.54737	0.0016749	up
hsa-circRNA1893-11	144.406	102.829	114.301	565.25	507.603	532.574	5.54625	0.00264572	up
hsa_circ_0094988	438.951	398.304	361.387	1748.2	1737.36	1872.46	5.5458	0.00064335	up
hsa_circ_0086200	62.8913	60.4413	58.5518	269.55	298.786	248.25	5.54212	0.00133021	up
hsa_circ_0139545	93.887	157.106	114.157	459.997	590.972	556.02	5.54078	0.00527837	up
hsa_circ_0105717	144.399	121.019	108.105	501.063	556.96	607.577	5.54056	0.000861343	up
hsa-circRNA11470-14	448.93	391.443	373.91	1821.04	1704.95	1895.68	5.53684	0.00100931	up
hsa_circ_0043739	3145.82	2467.43	2667.85	12214.3	11744.8	12893	5.5315	0.00148914	up
hsa_circ_0134784	329.14	318.853	338.805	1401.76	1543.46	1467.75	5.5314	0.00112908	up
hsa_circ_0005487	224.931	212.054	188.117	951.604	910.757	924.48	5.5311	0.000886696	up
hsa_circ_0098485	33.5514	44.6331	39.1549	149.383	166.156	210.797	5.52982	0.0030757	up
hsa_circ_0133871	17.7005	20.4694	9.44172	56.5436	74.8009	72.1686	5.52968	0.00819898	up
hsa_circ_0070705	89.324	85.8099	63.914	302.984	394.166	364.948	5.52429	0.00129105	up
hsa-circRNA14157-110	46.2186	55.776	28.5215	201.431	179.063	181.204	5.52275	0.00627506	up
hsa_circ_0043708	1335.68	1472.87	1025.13	5006.16	6386.57	5603	5.5214	0.00153609	up
hsa_circ_0113011	123.544	125.474	118.525	580.703	486.999	574.339	5.51259	0.00168674	up
hsa-circRNA16038-5	56.0402	42.4752	38.3826	214.647	191.066	196.78	5.51114	0.00238704	up
hsa_circ_0123085	90.4886	85.8598	61.2372	368.002	348.132	327.776	5.50965	0.00222374	up
hsa_circ_0113005	552.685	482.004	447.983	2057.05	2151.68	2376.27	5.50693	0.000646311	up
hsa_circ_0043236	257.841	232.407	181.12	974.063	996.865	984.317	5.50551	0.0011926	up
hsa_circ_0043261	44.9303	53.3786	34.6034	186.395	180.704	216.918	5.50502	0.00216687	up
hsa_circ_0010016	56.5042	57.2566	46.1177	213.956	196.32	312.071	5.5012	0.00333693	up
hsa_circ_0024591	85.7022	59.4969	55.2359	303.804	323.453	251.111	5.49611	0.00419102	up
hsa_circ_0045265	378.209	366.978	402.784	1591.58	1810.06	1699.43	5.49534	0.00134418	up
hsa_circ_0016395	88.5457	122.218	112.571	402.825	490.029	540.061	5.49396	0.00344366	up
hsa_circ_0127052	21.9375	25.5296	19.9703	84.5609	123.685	93.5601	5.49358	0.00237759	up
hsa_circ_0043737	3752.77	3600.07	3812.33	16616.3	16794.6	16147	5.49348	0.00132122	up
hsa_circ_0094209	229.98	238.793	192.568	971.039	954.922	997.735	5.49342	0.000791726	up
hsa_circ_0001678	208.936	243.119	180.757	868.229	942.771	981.011	5.49283	0.000978505	up
hsa_circ_0015889	87.9626	74.432	81.7623	346.647	428.176	315.307	5.49218	0.00266809	up
hsa-circRNA5147-27	102.337	127.033	93.5756	471.621	487.942	461.101	5.48803	0.00159887	up
hsa_circ_0043740	3568.85	3504.48	3509.45	15826.6	15495.2	15610.6	5.4879	0.00108126	up
hsa_circ_0071159	37.8694	57.6495	36.6652	205.447	162.245	209.224	5.48591	0.00569477	up
hsa_circ_0134787	296.64	256.702	218.562	1094.2	1159.45	1141.33	5.48332	0.000882317	up
hsa_circ_0098486	115.751	94.7108	89.141	358.59	486.128	487.135	5.48108	0.00141283	up
hsa_circ_0127370	43.9678	31.2515	25.0744	125.81	133.626	177.965	5.47987	0.00434595	up
hsa_circ_0133089	9.58629	12.4381	11.1748	46.4672	42.5637	58.4443	5.47808	0.00342359	up
hsa_circ_0043734	2477.86	2166.13	2258.03	9985.44	9578.34	10985.3	5.4768	0.00114409	up
hsa-circRNA11733-61	4802.76	4697.41	5239.75	20283	21562.7	23397.3	5.47412	0.00146287	up
hsa_circ_0016726	6.87928	5.93421	6.42251	26.6769	31.5745	26.8963	5.47081	0.0014278	up
hsa_circ_0034338	160.088	102.786	121.727	453.408	711.316	536.345	5.46982	0.00535305	up
hsa-circRNA6148-22	49.8875	78.8731	57.1352	237.901	304.166	267.55	5.46467	0.00440744	up
hsa_circ_0066457	25.1708	21.6189	12.9801	70.5555	81.5922	105.567	5.46303	0.00623307	up
hsa_circ_0106840	3012.33	2208.65	2583.02	10301.2	11198.6	12795.9	5.45995	0.00203627	up
hsa_circ_0067041	219.355	205.181	221.98	1049.33	852.063	959.003	5.45845	0.00258375	up
hsa_circ_0112067	41.3146	38.4586	29.9917	162.656	138.18	181.819	5.45698	0.00210469	up
hsa-circRNA10976	143.704	136.418	134.307	610.403	602.078	613.822	5.45538	0.000885078	up
hsa_circ_0043728	2909.28	2501.43	2753.12	11234.9	11198	13630	5.45343	0.00149766	up
hsa_circ_0115921	13.3928	10.2619	11.7291	49.8805	51.1425	54.0323	5.45176	0.00162941	up
hsa_circ_0116896	45.0074	48.7739	38.1073	167.836	211.638	201.115	5.44941	0.000864335	up
hsa_circ_0062062	673.528	565.53	600.551	2417.36	3002.64	2689.59	5.44825	0.00119498	up
hsa_circ_0088092	221.197	280.226	202.367	1211.69	819.394	1077.36	5.44678	0.00554033	up
hsa_circ_0125058	66.0175	63.5057	59.6244	266.557	286.89	278.225	5.44338	0.000609408	up
hsa-circRNA16245-5	22.9273	30.1198	24.2724	116.886	88.9487	137.041	5.44101	0.00514099	up
hsa_circ_0129943	13.0237	11.1371	6.61469	50.3511	34.4089	47.0111	5.43862	0.00964512	up
hsa_circ_0074868	3813.01	4114.3	2535.05	13305.9	20158.7	12574.7	5.4369	0.00655411	up
hsa_circ_0019874	862.299	818.135	859.187	3642.86	3806.21	3701.78	5.43407	0.00108722	up
hsa_circ_0094987	1245.7	978.544	1133.16	5269.6	4783.41	4639.78	5.43388	0.00263806	up
hsa_circ_0106392	7.36019	8.64653	7.84889	29.1543	36.0514	40.117	5.4284	0.00162941	up
hsa_circ_0024585	80.8922	72.5309	47.1565	286.862	301.841	269.245	5.42512	0.00345781	up
hsa_circ_0072523	26.8666	22.4455	17.8417	96.3393	100.984	93.1338	5.42412	0.00170871	up
hsa_circ_0046941	61.095	67.6806	37.7104	264.517	233.593	212.314	5.42236	0.00602822	up
hsa_circ_0129088	1068.85	715.513	674.169	3656.41	3525.18	3356.54	5.41762	0.00349231	up
hsa_circ_0019873	474.977	451.639	431.074	1979.23	2045.94	1916.2	5.41759	0.000882317	up
hsa_circ_0126442	29.6779	21.878	15.9736	92.0981	89.9053	104.959	5.41507	0.00410357	up
hsa-circRNA11434-68	138.347	148.709	131.766	690.667	411.954	798.294	5.41492	0.00979702	up
hsa_circ_0105705	182.292	185.019	161.056	760.411	740.917	805.596	5.40993	0.000682825	up
hsa_circ_0085114	29.9554	28.6516	34.7616	125.968	164.837	120.046	5.4098	0.00405048	up
[truncated: 2,082 more rows]
